# Supplementary material for: The “chemical tug-of-war” in carborane clusters: distinct tuning on different sides of the cluster
Source: Royal Society of Chemistry journal article supplement (doi:10.1039/d4qi02566k), 2024-10-31
Supplement: d4qi02566k1.pdf [file d4qi02566k1.pdf]

Electronic Supporting Information for

**The „chemical tug-of-war” in carborane clusters: distinct tuning on different sides of the cluster**

**Dániel Buzsáki,<sup>a#</sup> Dalma Gál,<sup>b#</sup> Balázs Szathmári,<sup>b</sup> Tamás Holczbauer,<sup>c</sup> Antal Udvardy,<sup>d</sup> Júlia Kertész Szilágyiné,<sup>b</sup> Denis Kargin,<sup>e</sup> Clemens Bruhn,<sup>e</sup> Rudolf Pietschnig,<sup>e</sup> Zsolt Kelemen<sup>\*b</sup>**

- 
- a.* Wigner Research Centre for Physics, P.O. Box 49, H-1525 Budapest, Hungary
- b.* Department of Inorganic and Analytical Chemistry Budapest University of Technology and Economics, Műegyetem Rkp 3., 1111 Budapest, Hungary
- c.* Chemical Crystallography Research Laboratory and Stereochemistry Research Group, Institute for Organic Chemistry, HUN-REN Research Centre for Natural Sciences, Magyar tudósok krt. 2, 1117 Budapest, Hungary
- d.* Department of Physical Chemistry, Institute of Chemistry, University of Debrecen, Faculty of Science and Technology, Egyetem tér 1., 4032 Debrecen, Hungary
- e.* Institute for Chemistry and CINSat University of Kassel, Heinrich-Plett-Straße 40, 34132 Kassel, Germany

## Table of Contents

|                                                                                                                                                                                                                |     |
|----------------------------------------------------------------------------------------------------------------------------------------------------------------------------------------------------------------|-----|
| Computational results and details.....                                                                                                                                                                         | S1  |
| Table S1. ....                                                                                                                                                                                                 | S1  |
| Table S2. ....                                                                                                                                                                                                 | S1  |
| Table S3. ....                                                                                                                                                                                                 | S2  |
| Table S4. ....                                                                                                                                                                                                 | S2  |
| Table S5. ....                                                                                                                                                                                                 | S3  |
| Table S6. ....                                                                                                                                                                                                 | S3  |
| Figure S1. ....                                                                                                                                                                                                | S4  |
| Figure S2. ....                                                                                                                                                                                                | S4  |
| Table S7. ....                                                                                                                                                                                                 | S4  |
| Table S8. ....                                                                                                                                                                                                 | S5  |
| Table S9. ....                                                                                                                                                                                                 | S5  |
| Table S10. ....                                                                                                                                                                                                | S5  |
| Table S11. ....                                                                                                                                                                                                | S6  |
| Table S12. ....                                                                                                                                                                                                | S7  |
| Table S13. ....                                                                                                                                                                                                | S8  |
| Table S14. ....                                                                                                                                                                                                | S9  |
| Table S15. ....                                                                                                                                                                                                | S10 |
| Table S16. ....                                                                                                                                                                                                | S11 |
| Table S17. ....                                                                                                                                                                                                | S12 |
| Table S18. ....                                                                                                                                                                                                | S13 |
| Table S19. ....                                                                                                                                                                                                | S14 |
| Table S20. ....                                                                                                                                                                                                | S15 |
| Table S21. ....                                                                                                                                                                                                | S16 |
| Table S22. ....                                                                                                                                                                                                | S17 |
| Table S23. ....                                                                                                                                                                                                | S18 |
| Table S24. ....                                                                                                                                                                                                | S19 |
| Table S25. ....                                                                                                                                                                                                | S20 |
| Table S26. ....                                                                                                                                                                                                | S21 |
| Figure S3. ....                                                                                                                                                                                                | S22 |
| Figure S4. ....                                                                                                                                                                                                | S22 |
| Synthetic protocols and characterization .....                                                                                                                                                                 | S23 |
| Synthesis of 9,12-(SH) <sub>2</sub> -1,2- <i>closo</i> -C <sub>2</sub> B <sub>10</sub> H <sub>10</sub> (1) and 9,10-(SH) <sub>2</sub> -1,7- <i>closo</i> -C <sub>2</sub> B <sub>10</sub> H <sub>10</sub> (2) . | S24 |

|                                                                                                                               |     |
|-------------------------------------------------------------------------------------------------------------------------------|-----|
| Synthesis of 9,10-(NH <sub>2</sub> ) <sub>2</sub> -1,7- <i>closo</i> -C <sub>2</sub> B <sub>10</sub> H <sub>10</sub> (3)..... | S25 |
| Synthesis and characterization of 4.....                                                                                      | S25 |
| Synthesis of 5.....                                                                                                           | S26 |
| Synthesis of 6.....                                                                                                           | S26 |
| NMR spectra of the compounds.....                                                                                             | S28 |
| Figure S5.....                                                                                                                | S28 |
| Figure S6.....                                                                                                                | S28 |
| Figure S7.....                                                                                                                | S29 |
| Figure S8.....                                                                                                                | S29 |
| Figure S9.....                                                                                                                | S30 |
| Figure S10.....                                                                                                               | S30 |
| Figure S11.....                                                                                                               | S31 |
| Figure S12.....                                                                                                               | S31 |
| Figure S13.....                                                                                                               | S32 |
| Figure S14.....                                                                                                               | S32 |
| Figure S15.....                                                                                                               | S33 |
| Figure S16.....                                                                                                               | S33 |
| Figure S17.....                                                                                                               | S34 |
| Figure S18.....                                                                                                               | S34 |
| Figure S19.....                                                                                                               | S35 |
| Figure S20.....                                                                                                               | S35 |
| Figure S21.....                                                                                                               | S36 |
| Figure S22.....                                                                                                               | S36 |
| Figure S23.....                                                                                                               | S37 |
| Figure S24.....                                                                                                               | S37 |
| Figure S25.....                                                                                                               | S38 |
| Figure S26.....                                                                                                               | S38 |
| Figure S27.....                                                                                                               | S39 |
| Figure S28.....                                                                                                               | S39 |
| Figure S29.....                                                                                                               | S40 |
| Figure S30.....                                                                                                               | S40 |
| Figure S31.....                                                                                                               | S41 |
| Figure S32.....                                                                                                               | S41 |
| Figure S33.....                                                                                                               | S42 |
| Figure S34.....                                                                                                               | S42 |

|                                                         |     |
|---------------------------------------------------------|-----|
| Figure S35.....                                         | S43 |
| Figure S36.....                                         | S43 |
| Figure S37.....                                         | S44 |
| Figure S38.....                                         | S44 |
| Figure S39.....                                         | S45 |
| Figure S40.....                                         | S45 |
| Figure S41.....                                         | S46 |
| IR and UV spectra of compound 4 .....                   | S47 |
| Figure S42.....                                         | S47 |
| Figure S43.....                                         | S47 |
| Single Crystal X-ray Diffraction (SC-XRD) studies ..... | S48 |
| Compound 1 .....                                        | S48 |
| Compound 2 .....                                        | S49 |
| Compound 3 .....                                        | S50 |
| Compound 4.....                                         | S51 |
| Compound 5 .....                                        | S52 |
| Compound 5' .....                                       | S53 |
| Compound 6.....                                         | S54 |
| Table S28. ....                                         | S55 |
| Table S29. ....                                         | S56 |
| Table S30. ....                                         | S57 |
| XYZ Geometries and Energies.....                        | S58 |

## Computational results and details

**Table S1.** Test of different method, using def2-TZVP basis set.

| X               | B3LYP | $\omega$ B97X-D | M06-2X | BP86 | PBEh1BE | PW6B95 | B3LYP-D3 | B3PW91 | B3PW91-D3 | LNO-CCSD (T) |
|-----------------|-------|-----------------|--------|------|---------|--------|----------|--------|-----------|--------------|
| SH              | 15.4  | 15.8            | 16.1   | 14.3 | 15.0    | 15.4   | 15.2     | 15.2   | 14.9      | 15.2         |
| S <sup>-</sup>  | 18.6  | 19.0            | 19.2   | 17.1 | 18.1    | 18.6   | 18.4     | 18.2   | 18.0      | 12.7         |
| NH <sub>2</sub> | 15.3  | 15.4            | 15.7   | 14.3 | 14.8    | 15.3   | 15.1     | 15.0   | 14.8      | 15.0         |

**Table S2.** Test of different method, using aug-cc-pVTZ basis set.

| X               | B3LYP | $\omega$ B97X-D | M06-2X | BP86 | PBEh1BE | PW6B95 | B3LYP-D3 | B3PW91 | B3PW91-D3 | LNO-CCSD (T) |
|-----------------|-------|-----------------|--------|------|---------|--------|----------|--------|-----------|--------------|
| SH              | 15.4  | 15.8            | 15.9   | 14.3 | 14.9    | 15.3   | 15.2     | 15.1   | 15.0      | 15.2         |
| S <sup>-</sup>  | 18.5  | 19.0            | 19.2   | 16,5 | 18.0    | 18.5   | 18.4     | 18.2   | 18.0      | 18.7         |
| NH <sub>2</sub> | 15.3  | 15.3            | 15.7   | 14.2 | 14.8    | 15.2   | 15.1     | 15.0   | 14.9      | 15.0         |

**Table S3.** Test of different method for the B-B bond length in *o*-carborane, using def2-TZVP basis set.

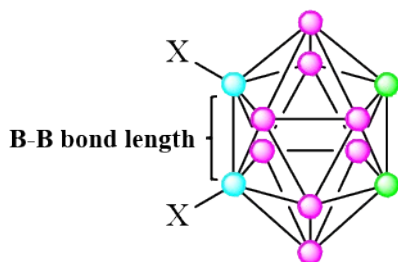

| X               | B3LYP | $\omega$ B97X-D | M06-2X | BP86  | PBEh1BE | PW6B95 | B3LYP-D3 | B3PW91 | B3PW91-D3 |
|-----------------|-------|-----------------|--------|-------|---------|--------|----------|--------|-----------|
| SH              | 1.786 | 1.780           | 1.785  | 1.794 | 1.793   | 1.785  | 1.801    | 1.796  | 1.797     |
| S <sup>-</sup>  | 1.950 | 1.926           | 1.915  | 1.960 | 1.931   | 1.924  | 1.949    | 1.936  | 1.939     |
| NH <sub>2</sub> | 1.822 | 1.812           | 1.806  | 1.830 | 1.812   | 1.807  | 1.820    | 1.818  | 1.818     |

**Table S4.** Test of different method for the B-B bond length in *m*-carborane, using def2-TZVP basis set

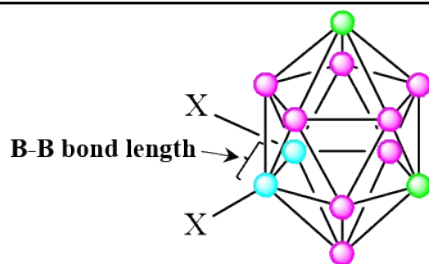

| X               | B3LYP | $\omega$ B97X-D | M06-2X | BP86  | PBEh1BE | PW6B95 | B3LYP-D3 | B3PW91 | B3PW91-D3 |
|-----------------|-------|-----------------|--------|-------|---------|--------|----------|--------|-----------|
| SH              | 1.797 | 1.789           | 1.791  | 1.803 | 1.805   | 1.799  | 1.816    | 1.808  | 1.808     |
| S <sup>-</sup>  | 1.982 | 1.956           | 1.938  | 1.992 | 1.957   | 1.951  | 1.980    | 1.966  | 1.966     |
| NH <sub>2</sub> | 1.844 | 1.828           | 1.822  | 1.851 | 1.833   | 1.827  | 1.842    | 1.836  | 1.837     |

**Table S5.** Test of different method for the B-B bond length in *o*-carborane, using aug-cc-pVTZ basis set

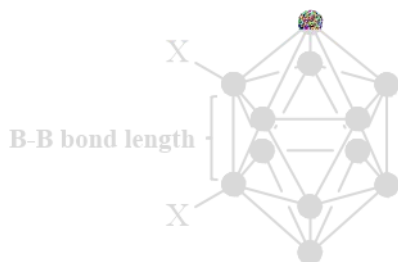

| X               | B3LYP | $\omega$ B97X-D | M06-2X | BP86  | PBEh1BE | PW6B95 | B3LYP-D3 | B3PW91 | B3PW91-D3 |
|-----------------|-------|-----------------|--------|-------|---------|--------|----------|--------|-----------|
| SH              | 1.799 | 1.790           | 1.778  | 1.806 | 1.792   | 1.784  | 1.800    | 1.796  | 1.796     |
| S <sup>-</sup>  | 1.942 | 1.917           | 1.909  | 1.943 | 1.926   | 1.918  | 1.941    | 1.931  | 1.930     |
| NH <sub>2</sub> | 1.823 | 1.810           | 1.806  | 1.831 | 1.816   | 1.808  | 1.820    | 1.819  | 1.816     |

**Table S6.** Test of different method for the B-B bond length in *m*-carborane, using aug-cc-pVTZ basis set

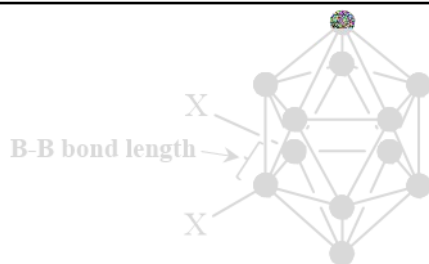

| X               | B3LYP | $\omega$ B97X-D | M06-2X | BP86  | PBEh1BE | PW6B95 | B3LYP-D3 | B3PW91 | B3PW91-D3 |
|-----------------|-------|-----------------|--------|-------|---------|--------|----------|--------|-----------|
| SH              | 1.814 | 1.798           | 1.790  | 1.820 | 1.804   | 1.792  | 1.815    | 1.808  | 1.809     |
| S <sup>-</sup>  | 1.975 | 1.945           | 1.931  | 1.984 | 1.953   | 1.947  | 1.974    | 1.958  | 1.960     |
| NH <sub>2</sub> | 1.845 | 1.828           | 1.824  | 1.852 | 1.835   | 1.828  | 1.843    | 1.838  | 1.835     |

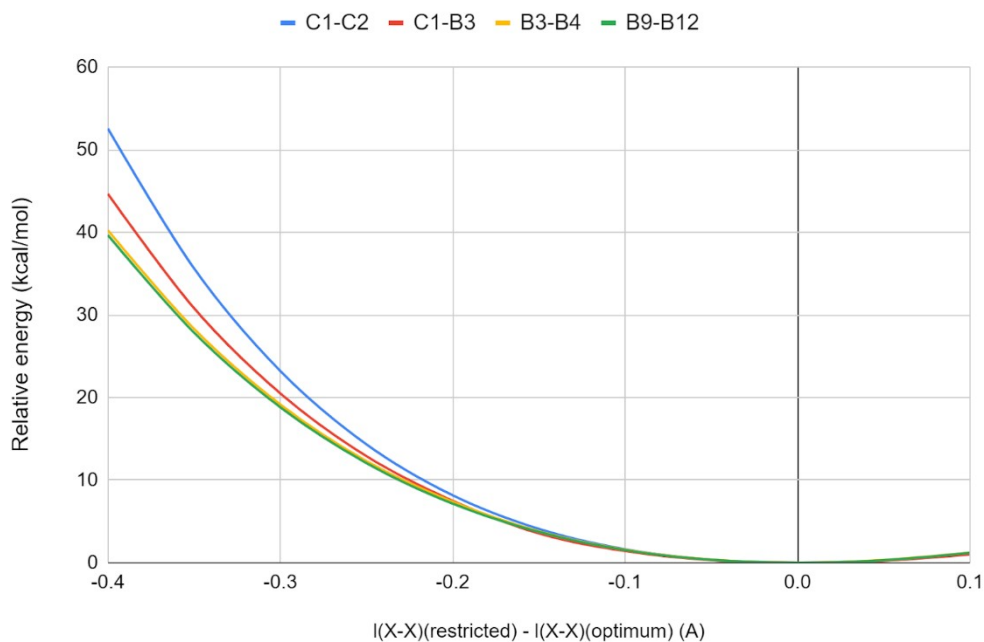

**Figure S1.** The difference in the energy compared to the optimized structure depending on the amount of shrinking in different bonds of *o*-carboranes. The trend is the opposite compared to the bond elongation, possibly due to the increasing distortion compared to the regular icosahedral geometry and the higher electronic repulsion in the more electronegative carbon atoms.

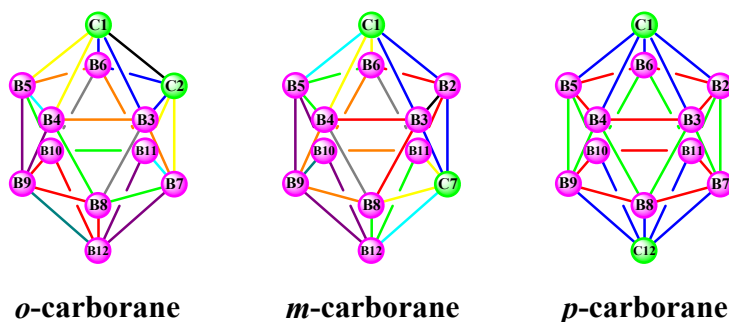

**Figure S2.** The chemically different bonds in the three different isomers of *closo*-dicarbododecaboranes.

**Table S7.** The Bader analysis of the restricted systems at the B3LYP/aug-cc-pVTZ level of theory

| C1-C2 | electron density | type | B9-B12 | electron density | type | C1-B4 | electron density | type | B4-B5 | electron density | type |
|-------|------------------|------|--------|------------------|------|-------|------------------|------|-------|------------------|------|
| opt   | 0.1866           | BCP  | opt    | 0.1197           | BCP  | opt   | 0.1239           | BCP  | opt   | 0.1165           | BCP  |
| 0.1   | 0.1534           | BCP  | 0.1    | 0.1031           | BCP  | 0.1   | 0.1063           | BCP  | 0.1   | 0.09914          | RCP  |
| 0.2   | 0.1277           | BCP  | 0.2    | 0.08947          | BCP  | 0.2   | 0.09196          | RCP  | 0.2   | 0.08642          | RCP  |
| 0.3   | 0.108            | BCP  | 0.3    | 0.07835          | RCP  | 0.3   | 0.08024          | RCP  | 0.3   | 0.07671          | RCP  |
| 0.4   | 0.09295          | RCP  | 0.4    | 0.06936          | RCP  | 0.4   | 0.0704           | RCP  | 0.4   | 0.06728          | RCP  |
| 0.5   | 0.08155          | RCP  | 0.5    | 0.06213          | RCP  | 0.5   | 0.06172          | RCP  | 0.5   | 0.06037          | RCP  |



**Table S8.** The difference in the energy (in kcal/mol) compared to the optimized structure depending on the amount of elongation in different bonds of the restricted systems in *ortho*-carborane.

| Elongation    | -0.15 | -0.10 | -0.05 | 0.00 | 0.05 | 0.10 | 0.15 | 0.20 | 0.25 | 0.30 | 0.40 | 0.50 |
|---------------|-------|-------|-------|------|------|------|------|------|------|------|------|------|
| Bond          |       |       |       |      |      |      |      |      |      |      |      |      |
| <b>C1-C2</b>  | 4.1   | 1.6   | 0.4   | 0.0  | 0.3  | 1.0  | 2.1  | 3.4  | 4.8  | 6.4  | 9.5  | 12.6 |
| <b>C1-B3</b>  | 3.5   | 1.4   | 0.3   | 0.0  | 0.2  | 1.0  | 2.3  | 3.7  | 5.4  | 7.3  | 11.6 | 16.3 |
| <b>C1-B4</b>  | 3.8   | 1.5   | 0.4   | 0.0  | 0.3  | 1.1  | 2.3  | 3.9  | 5.6  | 7.5  | 11.7 | 16.2 |
| <b>B3-B4</b>  | 3.8   | 1.6   | 0.4   | 0.0  | 0.3  | 1.2  | 2.6  | 4.4  | 6.5  | 8.9  | 14.2 | 20.3 |
| <b>B3-B8</b>  | 3.9   | 1.6   | 0.4   | 0.0  | 0.3  | 1.2  | 2.5  | 4.3  | 6.3  | 8.6  | 13.6 | 19.1 |
| <b>B4-B5</b>  | 3.8   | 1.6   | 0.4   | 0.0  | 0.3  | 1.2  | 2.6  | 4.4  | 6.5  | 8.9  | 14.3 | 20.5 |
| <b>B4-B8</b>  | 3.8   | 1.6   | 0.3   | 0.0  | 0.3  | 1.2  | 2.5  | 4.1  | 6.2  | 8.4  | 13.4 | 19.1 |
| <b>B4-B9</b>  | 3.7   | 1.6   | 0.3   | 0.0  | 0.3  | 1.1  | 2.5  | 4.1  | 6.1  | 8.2  | 13.3 | 18.8 |
| <b>B8-B9</b>  | 3.6   | 1.5   | 0.3   | 0.0  | 0.3  | 1.1  | 2.4  | 4.0  | 6.0  | 8.2  | 13.2 | 18.7 |
| <b>B9-B12</b> | 3.7   | 1.5   | 0.3   | 0.0  | 0.3  | 1.2  | 2.5  | 4.3  | 6.3  | 8.6  | 13.7 | 19.3 |

**Table S9.** The difference in the energy (in kcal/mol) compared to the optimized structure depending on the amount of elongation in different bonds of the restricted systems in *meta*-carborane.

| Elongation    | -0.15 | -0.10 | -0.05 | 0.00 | 0.05 | 0.10 | 0.15 | 0.20 | 0.25 | 0.30 | 0.40 | 0.50 |
|---------------|-------|-------|-------|------|------|------|------|------|------|------|------|------|
| Bond          |       |       |       |      |      |      |      |      |      |      |      |      |
| <b>C1-B2</b>  | 4.1   | 1.7   | 0.4   | 0.0  | 0.3  | 1.1  | 2.4  | 4.0  | 5.9  | 7.9  | 12.4 | 17.0 |
| <b>C1-B4</b>  | 3.7   | 1.6   | 0.3   | 0.0  | 0.3  | 1.2  | 2.3  | 3.8  | 5.6  | 7.4  | 11.7 | 16.3 |
| <b>C1-B5</b>  | 3.7   | 1.5   | 0.3   | 0.0  | 0.3  | 1.0  | 2.3  | 3.8  | 5.5  | 7.3  | 11.4 | 15.9 |
| <b>B2-B3</b>  | 3.8   | 1.5   | 0.3   | 0.0  | 0.3  | 1.2  | 2.6  | 4.5  | 6.8  | 9.3  | 15.2 | 22.0 |
| <b>B2-B6</b>  | 4.0   | 1.7   | 0.4   | 0.0  | 0.4  | 1.3  | 2.8  | 4.7  | 6.9  | 9.3  | 15.0 | 21.4 |
| <b>B4-B5</b>  | 3.8   | 1.6   | 0.4   | 0.0  | 0.4  | 1.3  | 2.7  | 4.5  | 6.6  | 9.0  | 14.4 | 20.6 |
| <b>B4-B8</b>  | 3.9   | 1.5   | 0.4   | 0.0  | 0.3  | 1.3  | 2.7  | 4.5  | 6.5  | 8.8  | 14.0 | 19.8 |
| <b>B4-B9</b>  | 3.8   | 1.5   | 0.4   | 0.0  | 0.4  | 1.2  | 2.5  | 4.2  | 6.2  | 8.5  | 13.6 | 19.2 |
| <b>B5-B9</b>  | 3.8   | 1.7   | 0.4   | 0.0  | 0.3  | 1.2  | 2.5  | 4.3  | 6.3  | 8.6  | 13.7 | 19.4 |
| <b>B9-B10</b> | 3.6   | 1.4   | 0.4   | 0.0  | 0.3  | 1.1  | 2.5  | 4.2  | 6.2  | 8.4  | 13.5 | 19.2 |

**Table S10.** The difference in the energy (in kcal/mol) compared to the optimized structure depending on the amount of elongation in different bonds of the restricted systems in *para*-carborane.

| Elongation   | -0.15 | -0.10 | -0.05 | 0.00 | 0.05 | 0.10 | 0.15 | 0.20 | 0.25 | 0.30 | 0.40 | 0.50 |
|--------------|-------|-------|-------|------|------|------|------|------|------|------|------|------|
| Bond         |       |       |       |      |      |      |      |      |      |      |      |      |
| <b>C1-B2</b> | 3.7   | 1.6   | 0.2   | 0.0  | 0.3  | 1.1  | 2.3  | 3.8  | 5.6  | 7.5  | 11.8 | 16.5 |
| <b>B2-B3</b> | 3.7   | 1.5   | 0.3   | 0.0  | 0.3  | 1.2  | 2.6  | 4.4  | 6.5  | 8.9  | 14.4 | 20.6 |
| <b>B2-B7</b> | 3.9   | 1.6   | 0.3   | 0.0  | 0.2  | 1.1  | 2.7  | 4.3  | 6.3  | 8.6  | 13.9 | 19.5 |

**Table S11.** The length of the different bonds in case of substitution on boron atom 3 (in Å) in *o*-carborane at the B3LYP/aug-cc-pVTZ level of theory

| <b>Substituent</b> | <b>H</b> | <b>NH<sub>2</sub></b> | <b>PH<sub>2</sub></b> | <b>CH<sub>3</sub></b> | <b>SiH<sub>3</sub></b> | <b>OH</b> | <b>SH</b> | <b>Cl</b> | <b>O<sup>-</sup></b> | <b>S<sup>-</sup></b> |
|--------------------|----------|-----------------------|-----------------------|-----------------------|------------------------|-----------|-----------|-----------|----------------------|----------------------|
| <b>Bond</b>        |          |                       |                       |                       |                        |           |           |           |                      |                      |
| <b>1-2</b>         | 1.62     | 1.60                  | 1.61                  | 1.62                  | 1.62                   | 1.63      | 1.62      | 1.62      | 1.56                 | 1.55                 |
| <b>1-3</b>         | 1.72     | 1.78                  | 1.74                  | 1.74                  | 1.73                   | 1.74      | 1.73      | 1.73      | 2.49                 | 2.20                 |
| <b>1-4</b>         | 1.69     | 1.69                  | 1.69                  | 1.69                  | 1.69                   | 1.69      | 1.69      | 1.69      | 1.63                 | 1.66                 |
| <b>1-5</b>         | 1.69     | 1.68                  | 1.69                  | 1.69                  | 1.69                   | 1.70      | 1.69      | 1.69      | 1.70                 | 1.68                 |
| <b>1-6</b>         | 1.72     | 1.72                  | 1.72                  | 1.72                  | 1.72                   | 1.71      | 1.72      | 1.72      | 1.71                 | 1.72                 |
| <b>2-3</b>         | 1.72     | 1.78                  | 1.73                  | 1.74                  | 1.73                   | 1.74      | 1.73      | 1.73      | 2.49                 | 2.20                 |
| <b>2-6</b>         | 1.72     | 1.72                  | 1.72                  | 1.72                  | 1.72                   | 1.71      | 1.72      | 1.72      | 1.71                 | 1.72                 |
| <b>2-7</b>         | 1.69     | 1.69                  | 1.69                  | 1.69                  | 1.69                   | 1.68      | 1.69      | 1.69      | 1.63                 | 1.66                 |
| <b>2-11</b>        | 1.69     | 1.68                  | 1.69                  | 1.69                  | 1.69                   | 1.70      | 1.69      | 1.69      | 1.70                 | 1.68                 |
| <b>3-4</b>         | 1.77     | 1.78                  | 1.78                  | 1.79                  | 1.78                   | 1.80      | 1.78      | 1.78      | 2.04                 | 1.89                 |
| <b>3-7</b>         | 1.77     | 1.78                  | 1.78                  | 1.79                  | 1.78                   | 1.80      | 1.78      | 1.78      | 2.04                 | 1.89                 |
| <b>3-8</b>         | 1.76     | 1.77                  | 1.77                  | 1.77                  | 1.77                   | 1.76      | 1.76      | 1.76      | 1.68                 | 1.72                 |
| <b>4-5</b>         | 1.78     | 1.78                  | 1.78                  | 1.78                  | 1.78                   | 1.78      | 1.78      | 1.78      | 1.80                 | 1.80                 |
| <b>4-8</b>         | 1.78     | 1.78                  | 1.78                  | 1.77                  | 1.77                   | 1.78      | 1.78      | 1.78      | 1.83                 | 1.80                 |
| <b>4-9</b>         | 1.77     | 1.78                  | 1.78                  | 1.77                  | 1.78                   | 1.77      | 1.77      | 1.77      | 1.77                 | 1.79                 |
| <b>5-6</b>         | 1.77     | 1.77                  | 1.77                  | 1.77                  | 1.77                   | 1.78      | 1.78      | 1.78      | 1.76                 | 1.76                 |
| <b>5-9</b>         | 1.77     | 1.78                  | 1.77                  | 1.77                  | 1.77                   | 1.77      | 1.78      | 1.78      | 1.76                 | 1.76                 |
| <b>5-10</b>        | 1.78     | 1.78                  | 1.78                  | 1.78                  | 1.78                   | 1.77      | 1.78      | 1.78      | 1.77                 | 1.77                 |
| <b>6-10</b>        | 1.76     | 1.75                  | 1.76                  | 1.76                  | 1.76                   | 1.76      | 1.76      | 1.76      | 1.77                 | 1.76                 |
| <b>6-11</b>        | 1.77     | 1.77                  | 1.77                  | 1.77                  | 1.77                   | 1.78      | 1.78      | 1.78      | 1.76                 | 1.76                 |
| <b>7-8</b>         | 1.78     | 1.78                  | 1.77                  | 1.77                  | 1.77                   | 1.78      | 1.78      | 1.78      | 1.83                 | 1.80                 |
| <b>7-11</b>        | 1.78     | 1.78                  | 1.78                  | 1.78                  | 1.78                   | 1.78      | 1.78      | 1.78      | 1.80                 | 1.80                 |
| <b>7-12</b>        | 1.77     | 1.78                  | 1.78                  | 1.77                  | 1.78                   | 1.77      | 1.77      | 1.77      | 1.77                 | 1.79                 |
| <b>8-9</b>         | 1.79     | 1.78                  | 1.79                  | 1.79                  | 1.79                   | 1.79      | 1.79      | 1.79      | 1.78                 | 1.78                 |
| <b>8-12</b>        | 1.79     | 1.78                  | 1.79                  | 1.79                  | 1.79                   | 1.79      | 1.79      | 1.79      | 1.78                 | 1.78                 |
| <b>9-10</b>        | 1.79     | 1.79                  | 1.79                  | 1.79                  | 1.79                   | 1.79      | 1.79      | 1.79      | 1.79                 | 1.79                 |
| <b>9-12</b>        | 1.78     | 1.78                  | 1.78                  | 1.78                  | 1.78                   | 1.78      | 1.78      | 1.78      | 1.82                 | 1.79                 |
| <b>10-11</b>       | 1.78     | 1.78                  | 1.78                  | 1.78                  | 1.78                   | 1.77      | 1.78      | 1.78      | 1.77                 | 1.77                 |
| <b>10-12</b>       | 1.79     | 1.79                  | 1.79                  | 1.79                  | 1.79                   | 1.79      | 1.79      | 1.79      | 1.79                 | 1.79                 |
| <b>11-12</b>       | 1.77     | 1.78                  | 1.78                  | 1.77                  | 1.77                   | 1.77      | 1.78      | 1.78      | 1.76                 | 1.76                 |

**Table S12.** The length of the different bonds in case of substitution on boron atom 4 (in Å) in *o*-carborane at the B3LYP/aug-cc-pVTZ level of theory

| <b>Substituent</b> | <b>H</b> | <b>NH<sub>2</sub></b> | <b>PH<sub>2</sub></b> | <b>CH<sub>3</sub></b> | <b>SiH<sub>3</sub></b> | <b>OH</b> | <b>SH</b> | <b>Cl</b> | <b>O<sup>-</sup></b> | <b>S<sup>-</sup></b> |
|--------------------|----------|-----------------------|-----------------------|-----------------------|------------------------|-----------|-----------|-----------|----------------------|----------------------|
| <b>Bond</b>        |          |                       |                       |                       |                        |           |           |           |                      |                      |
| <b>1-2</b>         | 1.62     | 1.61                  | 1.62                  | 1.62                  | 1.62                   | 1.61      | 1.62      | 1.62      | 1.62                 | 1.63                 |
| <b>1-3</b>         | 1.72     | 1.70                  | 1.71                  | 1.71                  | 1.71                   | 1.72      | 1.71      | 1.72      | 1.64                 | 1.67                 |
| <b>1-4</b>         | 1.69     | 1.76                  | 1.71                  | 1.71                  | 1.70                   | 1.74      | 1.72      | 1.70      | 2.36                 | 1.85                 |
| <b>1-5</b>         | 1.69     | 1.69                  | 1.69                  | 1.69                  | 1.69                   | 1.68      | 1.69      | 1.69      | 1.66                 | 1.68                 |
| <b>1-6</b>         | 1.72     | 1.71                  | 1.72                  | 1.72                  | 1.72                   | 1.72      | 1.71      | 1.72      | 1.72                 | 1.72                 |
| <b>2-3</b>         | 1.72     | 1.72                  | 1.72                  | 1.71                  | 1.72                   | 1.71      | 1.72      | 1.71      | 1.75                 | 1.73                 |
| <b>2-6</b>         | 1.72     | 1.71                  | 1.72                  | 1.72                  | 1.71                   | 1.72      | 1.71      | 1.72      | 1.71                 | 1.71                 |
| <b>2-7</b>         | 1.69     | 1.69                  | 1.69                  | 1.69                  | 1.69                   | 1.70      | 1.69      | 1.69      | 1.67                 | 1.68                 |
| <b>2-11</b>        | 1.69     | 1.69                  | 1.69                  | 1.69                  | 1.69                   | 1.69      | 1.69      | 1.69      | 1.69                 | 1.69                 |
| <b>3-4</b>         | 1.77     | 1.80                  | 1.78                  | 1.79                  | 1.78                   | 1.80      | 1.78      | 1.79      | 2.15                 | 1.85                 |
| <b>3-7</b>         | 1.77     | 1.78                  | 1.78                  | 1.77                  | 1.78                   | 1.78      | 1.77      | 1.77      | 1.79                 | 1.79                 |
| <b>3-8</b>         | 1.76     | 1.76                  | 1.76                  | 1.76                  | 1.76                   | 1.76      | 1.76      | 1.76      | 1.76                 | 1.76                 |
| <b>4-5</b>         | 1.78     | 1.80                  | 1.78                  | 1.79                  | 1.79                   | 1.81      | 1.78      | 1.79      | 2.11                 | 1.86                 |
| <b>4-8</b>         | 1.78     | 1.79                  | 1.78                  | 1.79                  | 1.79                   | 1.79      | 1.78      | 1.78      | 1.81                 | 1.83                 |
| <b>4-9</b>         | 1.77     | 1.79                  | 1.78                  | 1.79                  | 1.78                   | 1.78      | 1.78      | 1.78      | 1.76                 | 1.82                 |
| <b>5-6</b>         | 1.77     | 1.78                  | 1.78                  | 1.77                  | 1.78                   | 1.77      | 1.78      | 1.77      | 1.78                 | 1.78                 |
| <b>5-9</b>         | 1.77     | 1.77                  | 1.78                  | 1.77                  | 1.77                   | 1.78      | 1.78      | 1.78      | 1.78                 | 1.77                 |
| <b>5-10</b>        | 1.78     | 1.78                  | 1.78                  | 1.78                  | 1.78                   | 1.77      | 1.78      | 1.77      | 1.78                 | 1.78                 |
| <b>6-10</b>        | 1.76     | 1.76                  | 1.76                  | 1.76                  | 1.76                   | 1.76      | 1.76      | 1.76      | 1.73                 | 1.75                 |
| <b>6-11</b>        | 1.77     | 1.77                  | 1.77                  | 1.77                  | 1.78                   | 1.77      | 1.77      | 1.77      | 1.77                 | 1.77                 |
| <b>7-8</b>         | 1.78     | 1.77                  | 1.78                  | 1.78                  | 1.78                   | 1.77      | 1.78      | 1.78      | 1.77                 | 1.78                 |
| <b>7-11</b>        | 1.78     | 1.78                  | 1.78                  | 1.78                  | 1.78                   | 1.78      | 1.78      | 1.78      | 1.78                 | 1.78                 |
| <b>7-12</b>        | 1.77     | 1.77                  | 1.77                  | 1.77                  | 1.77                   | 1.77      | 1.77      | 1.77      | 1.77                 | 1.77                 |
| <b>8-9</b>         | 1.79     | 1.79                  | 1.78                  | 1.79                  | 1.78                   | 1.79      | 1.79      | 1.79      | 1.85                 | 1.79                 |
| <b>8-12</b>        | 1.79     | 1.79                  | 1.79                  | 1.79                  | 1.79                   | 1.78      | 1.79      | 1.79      | 1.78                 | 1.78                 |
| <b>9-10</b>        | 1.79     | 1.78                  | 1.79                  | 1.79                  | 1.79                   | 1.79      | 1.78      | 1.79      | 1.79                 | 1.79                 |
| <b>9-12</b>        | 1.78     | 1.78                  | 1.78                  | 1.78                  | 1.78                   | 1.78      | 1.78      | 1.78      | 1.78                 | 1.78                 |
| <b>10-11</b>       | 1.78     | 1.78                  | 1.78                  | 1.78                  | 1.78                   | 1.78      | 1.78      | 1.78      | 1.77                 | 1.78                 |
| <b>10-12</b>       | 1.79     | 1.79                  | 1.79                  | 1.79                  | 1.79                   | 1.79      | 1.79      | 1.79      | 1.81                 | 1.79                 |
| <b>11-12</b>       | 1.77     | 1.77                  | 1.77                  | 1.78                  | 1.77                   | 1.78      | 1.77      | 1.78      | 1.78                 | 1.78                 |

**Table S13.** The length of the different bonds in case of substitution on boron atom 8 (in Å) in *o*-carborane at the B3LYP/aug-cc-pVTZ level of theory

| <b>Substituent</b> | <b>H</b> | <b>NH<sub>2</sub></b> | <b>PH<sub>2</sub></b> | <b>CH<sub>3</sub></b> | <b>SiH<sub>3</sub></b> | <b>OH</b> | <b>SH</b> | <b>Cl</b> | <b>O<sup>-</sup></b> | <b>S<sup>-</sup></b> |
|--------------------|----------|-----------------------|-----------------------|-----------------------|------------------------|-----------|-----------|-----------|----------------------|----------------------|
| <b>Bond</b>        |          |                       |                       |                       |                        |           |           |           |                      |                      |
| <b>1-2</b>         | 1.62     | 1.63                  | 1.62                  | 1.62                  | 1.62                   | 1.63      | 1.63      | 1.62      | 1.63                 | 1.63                 |
| <b>1-3</b>         | 1.72     | 1.71                  | 1.72                  | 1.72                  | 1.72                   | 1.72      | 1.72      | 1.71      | 1.73                 | 1.73                 |
| <b>1-4</b>         | 1.69     | 1.68                  | 1.69                  | 1.69                  | 1.69                   | 1.68      | 1.69      | 1.69      | 1.69                 | 1.69                 |
| <b>1-5</b>         | 1.69     | 1.69                  | 1.69                  | 1.69                  | 1.69                   | 1.69      | 1.69      | 1.69      | 1.68                 | 1.68                 |
| <b>1-6</b>         | 1.72     | 1.72                  | 1.71                  | 1.72                  | 1.72                   | 1.72      | 1.72      | 1.72      | 1.71                 | 1.71                 |
| <b>2-3</b>         | 1.72     | 1.72                  | 1.72                  | 1.72                  | 1.72                   | 1.72      | 1.72      | 1.71      | 1.73                 | 1.73                 |
| <b>2-6</b>         | 1.72     | 1.71                  | 1.72                  | 1.72                  | 1.72                   | 1.72      | 1.71      | 1.72      | 1.71                 | 1.71                 |
| <b>2-7</b>         | 1.69     | 1.68                  | 1.69                  | 1.69                  | 1.69                   | 1.68      | 1.69      | 1.69      | 1.69                 | 1.69                 |
| <b>2-11</b>        | 1.69     | 1.69                  | 1.69                  | 1.69                  | 1.69                   | 1.69      | 1.69      | 1.69      | 1.68                 | 1.68                 |
| <b>3-4</b>         | 1.77     | 1.78                  | 1.77                  | 1.77                  | 1.77                   | 1.78      | 1.78      | 1.78      | 1.76                 | 1.76                 |
| <b>3-7</b>         | 1.77     | 1.77                  | 1.78                  | 1.77                  | 1.77                   | 1.78      | 1.78      | 1.78      | 1.76                 | 1.76                 |
| <b>3-8</b>         | 1.76     | 1.78                  | 1.76                  | 1.77                  | 1.76                   | 1.78      | 1.76      | 1.77      | 1.89                 | 1.89                 |
| <b>4-5</b>         | 1.78     | 1.78                  | 1.78                  | 1.78                  | 1.78                   | 1.78      | 1.78      | 1.78      | 1.78                 | 1.78                 |
| <b>4-8</b>         | 1.78     | 1.80                  | 1.79                  | 1.79                  | 1.78                   | 1.81      | 1.79      | 1.78      | 1.91                 | 1.91                 |
| <b>4-9</b>         | 1.77     | 1.77                  | 1.77                  | 1.77                  | 1.77                   | 1.77      | 1.77      | 1.78      | 1.78                 | 1.78                 |
| <b>5-6</b>         | 1.77     | 1.77                  | 1.77                  | 1.77                  | 1.78                   | 1.77      | 1.77      | 1.78      | 1.78                 | 1.78                 |
| <b>5-9</b>         | 1.77     | 1.77                  | 1.78                  | 1.77                  | 1.77                   | 1.77      | 1.77      | 1.77      | 1.77                 | 1.77                 |
| <b>5-10</b>        | 1.78     | 1.77                  | 1.78                  | 1.78                  | 1.78                   | 1.78      | 1.78      | 1.78      | 1.77                 | 1.77                 |
| <b>6-10</b>        | 1.76     | 1.76                  | 1.76                  | 1.76                  | 1.76                   | 1.76      | 1.76      | 1.76      | 1.77                 | 1.77                 |
| <b>6-11</b>        | 1.77     | 1.78                  | 1.77                  | 1.77                  | 1.78                   | 1.77      | 1.77      | 1.78      | 1.78                 | 1.78                 |
| <b>7-8</b>         | 1.78     | 1.81                  | 1.78                  | 1.79                  | 1.78                   | 1.81      | 1.79      | 1.78      | 1.91                 | 1.91                 |
| <b>7-11</b>        | 1.78     | 1.77                  | 1.78                  | 1.78                  | 1.78                   | 1.78      | 1.78      | 1.78      | 1.78                 | 1.78                 |
| <b>7-12</b>        | 1.77     | 1.77                  | 1.77                  | 1.77                  | 1.77                   | 1.77      | 1.77      | 1.78      | 1.78                 | 1.78                 |
| <b>8-9</b>         | 1.79     | 1.82                  | 1.79                  | 1.80                  | 1.80                   | 1.80      | 1.79      | 1.79      | 1.90                 | 1.90                 |
| <b>8-12</b>        | 1.79     | 1.80                  | 1.80                  | 1.80                  | 1.80                   | 1.80      | 1.79      | 1.79      | 1.90                 | 1.90                 |
| <b>9-10</b>        | 1.79     | 1.78                  | 1.79                  | 1.79                  | 1.79                   | 1.78      | 1.79      | 1.79      | 1.79                 | 1.79                 |
| <b>9-12</b>        | 1.78     | 1.78                  | 1.78                  | 1.78                  | 1.78                   | 1.78      | 1.78      | 1.78      | 1.78                 | 1.78                 |
| <b>10-11</b>       | 1.78     | 1.78                  | 1.78                  | 1.78                  | 1.78                   | 1.78      | 1.78      | 1.78      | 1.77                 | 1.77                 |
| <b>10-12</b>       | 1.79     | 1.79                  | 1.79                  | 1.79                  | 1.79                   | 1.78      | 1.79      | 1.79      | 1.79                 | 1.79                 |
| <b>11-12</b>       | 1.77     | 1.78                  | 1.78                  | 1.77                  | 1.78                   | 1.77      | 1.78      | 1.77      | 1.77                 | 1.77                 |

**Table S14.** The length of the different bonds in case of substitution on boron atom 9 (in Å) in *o*-carborane at the B3LYP/aug-cc-pVTZ level of theory

| <b>Substituent</b> | <b>H</b> | <b>NH<sub>2</sub></b> | <b>PH<sub>2</sub></b> | <b>CH<sub>3</sub></b> | <b>SiH<sub>3</sub></b> | <b>OH</b> | <b>SH</b> | <b>Cl</b> | <b>O<sup>-</sup></b> | <b>S<sup>-</sup></b> |
|--------------------|----------|-----------------------|-----------------------|-----------------------|------------------------|-----------|-----------|-----------|----------------------|----------------------|
| <b>Bond</b>        |          |                       |                       |                       |                        |           |           |           |                      |                      |
| <b>1-2</b>         | 1.62     | 1.63                  | 1.62                  | 1.62                  | 1.62                   | 1.63      | 1.63      | 1.62      | 1.63                 | 1.63                 |
| <b>1-3</b>         | 1.72     | 1.72                  | 1.72                  | 1.72                  | 1.72                   | 1.72      | 1.72      | 1.72      | 1.71                 | 1.71                 |
| <b>1-4</b>         | 1.69     | 1.68                  | 1.69                  | 1.69                  | 1.69                   | 1.69      | 1.69      | 1.69      | 1.69                 | 1.70                 |
| <b>1-5</b>         | 1.69     | 1.69                  | 1.69                  | 1.69                  | 1.69                   | 1.69      | 1.69      | 1.69      | 1.69                 | 1.70                 |
| <b>1-6</b>         | 1.72     | 1.72                  | 1.72                  | 1.72                  | 1.72                   | 1.72      | 1.72      | 1.72      | 1.71                 | 1.71                 |
| <b>2-3</b>         | 1.72     | 1.71                  | 1.72                  | 1.72                  | 1.72                   | 1.71      | 1.71      | 1.72      | 1.72                 | 1.72                 |
| <b>2-6</b>         | 1.72     | 1.71                  | 1.71                  | 1.72                  | 1.72                   | 1.71      | 1.71      | 1.72      | 1.72                 | 1.72                 |
| <b>2-7</b>         | 1.69     | 1.70                  | 1.69                  | 1.69                  | 1.69                   | 1.69      | 1.69      | 1.69      | 1.70                 | 1.70                 |
| <b>2-11</b>        | 1.69     | 1.69                  | 1.69                  | 1.69                  | 1.69                   | 1.69      | 1.69      | 1.69      | 1.70                 | 1.70                 |
| <b>3-4</b>         | 1.77     | 1.78                  | 1.78                  | 1.78                  | 1.78                   | 1.78      | 1.78      | 1.77      | 1.78                 | 1.78                 |
| <b>3-7</b>         | 1.77     | 1.77                  | 1.77                  | 1.77                  | 1.78                   | 1.77      | 1.77      | 1.77      | 1.76                 | 1.76                 |
| <b>3-8</b>         | 1.76     | 1.76                  | 1.76                  | 1.76                  | 1.76                   | 1.75      | 1.76      | 1.76      | 1.75                 | 1.75                 |
| <b>4-5</b>         | 1.78     | 1.79                  | 1.78                  | 1.78                  | 1.78                   | 1.79      | 1.79      | 1.79      | 1.76                 | 1.77                 |
| <b>4-8</b>         | 1.78     | 1.77                  | 1.78                  | 1.77                  | 1.77                   | 1.78      | 1.77      | 1.78      | 1.78                 | 1.77                 |
| <b>4-9</b>         | 1.77     | 1.80                  | 1.78                  | 1.79                  | 1.78                   | 1.80      | 1.78      | 1.78      | 1.90                 | 1.84                 |
| <b>5-6</b>         | 1.77     | 1.78                  | 1.77                  | 1.78                  | 1.78                   | 1.78      | 1.78      | 1.77      | 1.78                 | 1.78                 |
| <b>5-9</b>         | 1.77     | 1.79                  | 1.78                  | 1.79                  | 1.78                   | 1.80      | 1.78      | 1.78      | 1.90                 | 1.84                 |
| <b>5-10</b>        | 1.78     | 1.77                  | 1.77                  | 1.77                  | 1.78                   | 1.78      | 1.77      | 1.78      | 1.78                 | 1.77                 |
| <b>6-10</b>        | 1.76     | 1.75                  | 1.76                  | 1.76                  | 1.76                   | 1.75      | 1.76      | 1.76      | 1.75                 | 1.75                 |
| <b>6-11</b>        | 1.77     | 1.77                  | 1.77                  | 1.77                  | 1.78                   | 1.77      | 1.77      | 1.77      | 1.76                 | 1.76                 |
| <b>7-8</b>         | 1.78     | 1.77                  | 1.78                  | 1.78                  | 1.78                   | 1.77      | 1.77      | 1.77      | 1.77                 | 1.77                 |
| <b>7-11</b>        | 1.78     | 1.79                  | 1.78                  | 1.78                  | 1.78                   | 1.78      | 1.78      | 1.78      | 1.78                 | 1.78                 |
| <b>7-12</b>        | 1.77     | 1.78                  | 1.78                  | 1.77                  | 1.77                   | 1.77      | 1.78      | 1.77      | 1.77                 | 1.78                 |
| <b>8-9</b>         | 1.79     | 1.82                  | 1.80                  | 1.80                  | 1.79                   | 1.82      | 1.80      | 1.79      | 1.91                 | 1.86                 |
| <b>8-12</b>        | 1.79     | 1.79                  | 1.78                  | 1.78                  | 1.79                   | 1.79      | 1.79      | 1.79      | 1.79                 | 1.78                 |
| <b>9-10</b>        | 1.79     | 1.83                  | 1.80                  | 1.80                  | 1.79                   | 1.82      | 1.80      | 1.79      | 1.91                 | 1.86                 |
| <b>9-12</b>        | 1.78     | 1.79                  | 1.79                  | 1.79                  | 1.79                   | 1.79      | 1.78      | 1.78      | 1.89                 | 1.85                 |
| <b>10-11</b>       | 1.78     | 1.77                  | 1.78                  | 1.78                  | 1.78                   | 1.77      | 1.77      | 1.77      | 1.77                 | 1.77                 |
| <b>10-12</b>       | 1.79     | 1.78                  | 1.79                  | 1.78                  | 1.79                   | 1.79      | 1.79      | 1.79      | 1.79                 | 1.78                 |
| <b>11-12</b>       | 1.77     | 1.78                  | 1.77                  | 1.77                  | 1.77                   | 1.77      | 1.78      | 1.77      | 1.77                 | 1.78                 |

**Table S15.** The length of the different bonds in case of substitution on boron atom 2 (in Å) in *m*-carborane at the B3LYP/aug-cc-pVTZ level of theory

| <b>Substituent</b> | <b>H</b> | <b>NH<sub>2</sub></b> | <b>PH<sub>2</sub></b> | <b>CH<sub>3</sub></b> | <b>SiH<sub>3</sub></b> | <b>OH</b> | <b>SH</b> | <b>Cl</b> | <b>O<sup>-</sup></b> | <b>S<sup>-</sup></b> |
|--------------------|----------|-----------------------|-----------------------|-----------------------|------------------------|-----------|-----------|-----------|----------------------|----------------------|
| <b>Bond</b>        |          |                       |                       |                       |                        |           |           |           |                      |                      |
| <b>1-2</b>         | 1.69     | 1.74                  | 1.70                  | 1.71                  | 1.70                   | 1.72      | 1.71      | 1.70      | 2.58                 | 1.80                 |
| <b>1-3</b>         | 1.69     | 1.68                  | 1.69                  | 1.68                  | 1.69                   | 1.68      | 1.69      | 1.69      | 1.63                 | 1.67                 |
| <b>1-4</b>         | 1.71     | 1.70                  | 1.71                  | 1.71                  | 1.71                   | 1.71      | 1.70      | 1.71      | 1.70                 | 1.71                 |
| <b>1-5</b>         | 1.71     | 1.70                  | 1.71                  | 1.71                  | 1.71                   | 1.71      | 1.71      | 1.71      | 1.66                 | 1.70                 |
| <b>1-6</b>         | 1.71     | 1.70                  | 1.70                  | 1.71                  | 1.70                   | 1.71      | 1.70      | 1.72      | 1.66                 | 1.70                 |
| <b>2-3</b>         | 1.78     | 1.80                  | 1.79                  | 1.80                  | 1.79                   | 1.81      | 1.79      | 1.80      | 2.81                 | 1.87                 |
| <b>2-6</b>         | 1.76     | 1.78                  | 1.77                  | 1.78                  | 1.77                   | 1.77      | 1.77      | 1.77      | 1.78                 | 1.81                 |
| <b>2-7</b>         | 1.69     | 1.73                  | 1.71                  | 1.71                  | 1.70                   | 1.72      | 1.71      | 1.70      | 2.58                 | 1.80                 |
| <b>2-11</b>        | 1.76     | 1.78                  | 1.77                  | 1.78                  | 1.77                   | 1.77      | 1.77      | 1.77      | 1.78                 | 1.81                 |
| <b>3-4</b>         | 1.76     | 1.77                  | 1.77                  | 1.76                  | 1.77                   | 1.76      | 1.76      | 1.76      | 1.79                 | 1.77                 |
| <b>3-7</b>         | 1.69     | 1.68                  | 1.69                  | 1.68                  | 1.69                   | 1.68      | 1.69      | 1.69      | 1.63                 | 1.67                 |
| <b>3-8</b>         | 1.76     | 1.76                  | 1.77                  | 1.76                  | 1.77                   | 1.76      | 1.76      | 1.76      | 1.79                 | 1.77                 |
| <b>4-5</b>         | 1.78     | 1.77                  | 1.78                  | 1.78                  | 1.78                   | 1.78      | 1.78      | 1.78      | 1.76                 | 1.77                 |
| <b>4-8</b>         | 1.77     | 1.77                  | 1.77                  | 1.77                  | 1.77                   | 1.77      | 1.77      | 1.77      | 1.74                 | 1.76                 |
| <b>4-9</b>         | 1.78     | 1.78                  | 1.78                  | 1.78                  | 1.78                   | 1.78      | 1.78      | 1.78      | 1.79                 | 1.77                 |
| <b>5-6</b>         | 1.78     | 1.78                  | 1.78                  | 1.78                  | 1.78                   | 1.78      | 1.78      | 1.78      | 1.81                 | 1.78                 |
| <b>5-9</b>         | 1.77     | 1.77                  | 1.77                  | 1.77                  | 1.77                   | 1.77      | 1.77      | 1.77      | 1.76                 | 1.77                 |
| <b>5-10</b>        | 1.77     | 1.77                  | 1.77                  | 1.77                  | 1.77                   | 1.77      | 1.77      | 1.77      | 1.80                 | 1.77                 |
| <b>6-10</b>        | 1.78     | 1.77                  | 1.78                  | 1.77                  | 1.78                   | 1.77      | 1.77      | 1.77      | 1.78                 | 1.78                 |
| <b>6-11</b>        | 1.77     | 1.77                  | 1.77                  | 1.76                  | 1.77                   | 1.76      | 1.77      | 1.77      | 1.82                 | 1.75                 |
| <b>7-8</b>         | 1.71     | 1.70                  | 1.71                  | 1.71                  | 1.71                   | 1.71      | 1.70      | 1.71      | 1.70                 | 1.71                 |
| <b>7-11</b>        | 1.71     | 1.70                  | 1.70                  | 1.71                  | 1.70                   | 1.71      | 1.70      | 1.72      | 1.66                 | 1.70                 |
| <b>7-12</b>        | 1.71     | 1.70                  | 1.71                  | 1.71                  | 1.71                   | 1.71      | 1.71      | 1.71      | 1.66                 | 1.70                 |
| <b>8-9</b>         | 1.78     | 1.78                  | 1.78                  | 1.78                  | 1.78                   | 1.78      | 1.78      | 1.78      | 1.79                 | 1.77                 |
| <b>8-12</b>        | 1.78     | 1.77                  | 1.78                  | 1.78                  | 1.78                   | 1.78      | 1.78      | 1.78      | 1.76                 | 1.77                 |
| <b>9-10</b>        | 1.79     | 1.79                  | 1.79                  | 1.79                  | 1.79                   | 1.79      | 1.79      | 1.79      | 1.79                 | 1.79                 |
| <b>9-12</b>        | 1.77     | 1.77                  | 1.77                  | 1.77                  | 1.77                   | 1.77      | 1.77      | 1.77      | 1.76                 | 1.77                 |
| <b>10-11</b>       | 1.78     | 1.77                  | 1.78                  | 1.78                  | 1.78                   | 1.77      | 1.77      | 1.77      | 1.78                 | 1.78                 |
| <b>10-12</b>       | 1.77     | 1.77                  | 1.77                  | 1.77                  | 1.77                   | 1.77      | 1.77      | 1.77      | 1.80                 | 1.77                 |
| <b>11-12</b>       | 1.78     | 1.78                  | 1.78                  | 1.78                  | 1.78                   | 1.78      | 1.78      | 1.78      | 1.81                 | 1.78                 |

**Table S16.** The length of the different bonds in case of substitution on boron atom 4 (in Å) in *m*-carborane at the B3LYP/aug-cc-pVTZ level of theory

| <b>Substituent</b> | <b>H</b> | <b>NH<sub>2</sub></b> | <b>PH<sub>2</sub></b> | <b>CH<sub>3</sub></b> | <b>SiH<sub>3</sub></b> | <b>OH</b> | <b>SH</b> | <b>Cl</b> | <b>O<sup>-</sup></b> | <b>S<sup>-</sup></b> |
|--------------------|----------|-----------------------|-----------------------|-----------------------|------------------------|-----------|-----------|-----------|----------------------|----------------------|
| <b>Bond</b>        |          |                       |                       |                       |                        |           |           |           |                      |                      |
| <b>1-2</b>         | 1.69     | 1.68                  | 1.69                  | 1.69                  | 1.69                   | 1.68      | 1.68      | 1.69      | 1.67                 | 1.68                 |
| <b>1-3</b>         | 1.69     | 1.68                  | 1.69                  | 1.69                  | 1.69                   | 1.69      | 1.69      | 1.69      | 1.65                 | 1.67                 |
| <b>1-4</b>         | 1.71     | 1.78                  | 1.73                  | 1.73                  | 1.72                   | 1.76      | 1.74      | 1.72      | 2.23                 | 1.87                 |
| <b>1-5</b>         | 1.71     | 1.70                  | 1.70                  | 1.70                  | 1.70                   | 1.70      | 1.70      | 1.71      | 1.67                 | 1.69                 |
| <b>1-6</b>         | 1.71     | 1.70                  | 1.71                  | 1.71                  | 1.71                   | 1.71      | 1.70      | 1.71      | 1.69                 | 1.70                 |
| <b>2-3</b>         | 1.78     | 1.79                  | 1.79                  | 1.78                  | 1.79                   | 1.79      | 1.79      | 1.78      | 1.81                 | 1.80                 |
| <b>2-6</b>         | 1.76     | 1.76                  | 1.76                  | 1.76                  | 1.76                   | 1.76      | 1.76      | 1.76      | 1.75                 | 1.75                 |
| <b>2-7</b>         | 1.69     | 1.69                  | 1.69                  | 1.69                  | 1.69                   | 1.69      | 1.69      | 1.69      | 1.68                 | 1.68                 |
| <b>2-11</b>        | 1.76     | 1.76                  | 1.76                  | 1.76                  | 1.76                   | 1.76      | 1.76      | 1.76      | 1.76                 | 1.76                 |
| <b>3-4</b>         | 1.76     | 1.78                  | 1.77                  | 1.78                  | 1.77                   | 1.78      | 1.77      | 1.77      | 2.03                 | 1.84                 |
| <b>3-7</b>         | 1.69     | 1.69                  | 1.69                  | 1.69                  | 1.69                   | 1.69      | 1.69      | 1.68      | 1.70                 | 1.70                 |
| <b>3-8</b>         | 1.76     | 1.77                  | 1.77                  | 1.76                  | 1.76                   | 1.76      | 1.77      | 1.77      | 1.75                 | 1.75                 |
| <b>4-5</b>         | 1.78     | 1.79                  | 1.78                  | 1.79                  | 1.79                   | 1.80      | 1.78      | 1.78      | 2.01                 | 1.86                 |
| <b>4-8</b>         | 1.77     | 1.78                  | 1.77                  | 1.78                  | 1.77                   | 1.78      | 1.77      | 1.77      | 1.80                 | 1.81                 |
| <b>4-9</b>         | 1.78     | 1.79                  | 1.79                  | 1.79                  | 1.79                   | 1.79      | 1.78      | 1.78      | 1.78                 | 1.83                 |
| <b>5-6</b>         | 1.78     | 1.78                  | 1.78                  | 1.78                  | 1.78                   | 1.78      | 1.78      | 1.78      | 1.80                 | 1.79                 |
| <b>5-9</b>         | 1.77     | 1.77                  | 1.77                  | 1.77                  | 1.77                   | 1.77      | 1.78      | 1.77      | 1.78                 | 1.76                 |
| <b>5-10</b>        | 1.77     | 1.78                  | 1.77                  | 1.77                  | 1.77                   | 1.77      | 1.77      | 1.77      | 1.78                 | 1.78                 |
| <b>6-10</b>        | 1.78     | 1.78                  | 1.78                  | 1.78                  | 1.78                   | 1.78      | 1.78      | 1.78      | 1.76                 | 1.77                 |
| <b>6-11</b>        | 1.77     | 1.77                  | 1.77                  | 1.77                  | 1.77                   | 1.77      | 1.77      | 1.77      | 1.77                 | 1.76                 |
| <b>7-8</b>         | 1.71     | 1.70                  | 1.71                  | 1.71                  | 1.71                   | 1.70      | 1.71      | 1.71      | 1.71                 | 1.72                 |
| <b>7-11</b>        | 1.71     | 1.71                  | 1.71                  | 1.71                  | 1.71                   | 1.71      | 1.71      | 1.71      | 1.70                 | 1.71                 |
| <b>7-12</b>        | 1.71     | 1.71                  | 1.71                  | 1.71                  | 1.71                   | 1.71      | 1.71      | 1.71      | 1.71                 | 1.70                 |
| <b>8-9</b>         | 1.78     | 1.77                  | 1.77                  | 1.77                  | 1.77                   | 1.78      | 1.77      | 1.78      | 1.83                 | 1.78                 |
| <b>8-12</b>        | 1.78     | 1.78                  | 1.78                  | 1.78                  | 1.78                   | 1.78      | 1.78      | 1.78      | 1.78                 | 1.78                 |
| <b>9-10</b>        | 1.79     | 1.78                  | 1.79                  | 1.79                  | 1.79                   | 1.79      | 1.79      | 1.79      | 1.78                 | 1.79                 |
| <b>9-12</b>        | 1.77     | 1.77                  | 1.77                  | 1.77                  | 1.77                   | 1.77      | 1.77      | 1.77      | 1.76                 | 1.77                 |
| <b>10-11</b>       | 1.78     | 1.78                  | 1.78                  | 1.78                  | 1.78                   | 1.78      | 1.78      | 1.78      | 1.78                 | 1.78                 |
| <b>10-12</b>       | 1.77     | 1.77                  | 1.77                  | 1.77                  | 1.77                   | 1.77      | 1.77      | 1.77      | 1.78                 | 1.77                 |
| <b>11-12</b>       | 1.78     | 1.77                  | 1.78                  | 1.78                  | 1.78                   | 1.78      | 1.78      | 1.78      | 1.78                 | 1.78                 |

**Table S17.** The length of the different bonds in case of substitution on boron atom 5 (in Å) in *m*-carborane at the B3LYP/aug-cc-pVTZ level of theory

| <b>Substituent</b> | <b>H</b> | <b>NH<sub>2</sub></b> | <b>PH<sub>2</sub></b> | <b>CH<sub>3</sub></b> | <b>SiH<sub>3</sub></b> | <b>OH</b> | <b>SH</b> | <b>Cl</b> | <b>O<sup>-</sup></b> | <b>S<sup>-</sup></b> |
|--------------------|----------|-----------------------|-----------------------|-----------------------|------------------------|-----------|-----------|-----------|----------------------|----------------------|
| <b>Bond</b>        |          |                       |                       |                       |                        |           |           |           |                      |                      |
| <b>1-2</b>         | 1.69     | 1.68                  | 1.69                  | 1.69                  | 1.69                   | 1.68      | 1.68      | 1.69      | 1.67                 | 1.68                 |
| <b>1-3</b>         | 1.69     | 1.68                  | 1.69                  | 1.69                  | 1.69                   | 1.69      | 1.69      | 1.69      | 1.67                 | 1.68                 |
| <b>1-4</b>         | 1.71     | 1.70                  | 1.71                  | 1.70                  | 1.71                   | 1.70      | 1.70      | 1.71      | 1.67                 | 1.69                 |
| <b>1-5</b>         | 1.71     | 1.78                  | 1.73                  | 1.73                  | 1.72                   | 1.75      | 1.74      | 1.72      | 2.28                 | 1.87                 |
| <b>1-6</b>         | 1.71     | 1.70                  | 1.71                  | 1.71                  | 1.71                   | 1.71      | 1.71      | 1.71      | 1.67                 | 1.69                 |
| <b>2-3</b>         | 1.78     | 1.78                  | 1.78                  | 1.78                  | 1.78                   | 1.78      | 1.78      | 1.79      | 1.78                 | 1.78                 |
| <b>2-6</b>         | 1.76     | 1.77                  | 1.77                  | 1.76                  | 1.77                   | 1.76      | 1.77      | 1.76      | 1.78                 | 1.77                 |
| <b>2-7</b>         | 1.69     | 1.69                  | 1.69                  | 1.69                  | 1.69                   | 1.69      | 1.69      | 1.69      | 1.70                 | 1.69                 |
| <b>2-11</b>        | 1.76     | 1.77                  | 1.76                  | 1.76                  | 1.76                   | 1.77      | 1.77      | 1.76      | 1.74                 | 1.75                 |
| <b>3-4</b>         | 1.76     | 1.77                  | 1.77                  | 1.76                  | 1.77                   | 1.76      | 1.77      | 1.76      | 1.78                 | 1.77                 |
| <b>3-7</b>         | 1.69     | 1.69                  | 1.69                  | 1.69                  | 1.69                   | 1.69      | 1.69      | 1.69      | 1.70                 | 1.69                 |
| <b>3-8</b>         | 1.76     | 1.77                  | 1.76                  | 1.76                  | 1.76                   | 1.76      | 1.76      | 1.76      | 1.74                 | 1.75                 |
| <b>4-5</b>         | 1.78     | 1.80                  | 1.78                  | 1.79                  | 1.78                   | 1.80      | 1.78      | 1.79      | 2.06                 | 1.86                 |
| <b>4-8</b>         | 1.77     | 1.77                  | 1.77                  | 1.76                  | 1.77                   | 1.76      | 1.77      | 1.76      | 1.77                 | 1.77                 |
| <b>4-9</b>         | 1.78     | 1.78                  | 1.78                  | 1.77                  | 1.78                   | 1.78      | 1.78      | 1.78      | 1.78                 | 1.77                 |
| <b>5-6</b>         | 1.78     | 1.80                  | 1.78                  | 1.79                  | 1.78                   | 1.79      | 1.78      | 1.79      | 2.06                 | 1.86                 |
| <b>5-9</b>         | 1.77     | 1.79                  | 1.78                  | 1.79                  | 1.78                   | 1.78      | 1.78      | 1.78      | 1.79                 | 1.82                 |
| <b>5-10</b>        | 1.77     | 1.79                  | 1.78                  | 1.79                  | 1.78                   | 1.79      | 1.78      | 1.78      | 1.79                 | 1.82                 |
| <b>6-10</b>        | 1.78     | 1.78                  | 1.78                  | 1.77                  | 1.78                   | 1.77      | 1.78      | 1.78      | 1.78                 | 1.77                 |
| <b>6-11</b>        | 1.77     | 1.77                  | 1.77                  | 1.76                  | 1.77                   | 1.77      | 1.77      | 1.76      | 1.77                 | 1.77                 |
| <b>7-8</b>         | 1.71     | 1.71                  | 1.71                  | 1.71                  | 1.71                   | 1.71      | 1.71      | 1.71      | 1.71                 | 1.71                 |
| <b>7-11</b>        | 1.71     | 1.71                  | 1.71                  | 1.71                  | 1.71                   | 1.71      | 1.71      | 1.71      | 1.71                 | 1.71                 |
| <b>7-12</b>        | 1.71     | 1.70                  | 1.71                  | 1.71                  | 1.71                   | 1.71      | 1.70      | 1.71      | 1.71                 | 1.72                 |
| <b>8-9</b>         | 1.78     | 1.77                  | 1.77                  | 1.78                  | 1.78                   | 1.77      | 1.77      | 1.78      | 1.77                 | 1.78                 |
| <b>8-12</b>        | 1.78     | 1.78                  | 1.78                  | 1.78                  | 1.78                   | 1.78      | 1.78      | 1.78      | 1.79                 | 1.77                 |
| <b>9-10</b>        | 1.79     | 1.78                  | 1.78                  | 1.79                  | 1.78                   | 1.79      | 1.79      | 1.79      | 1.84                 | 1.79                 |
| <b>9-12</b>        | 1.77     | 1.77                  | 1.77                  | 1.77                  | 1.77                   | 1.77      | 1.77      | 1.77      | 1.76                 | 1.77                 |
| <b>10-11</b>       | 1.78     | 1.77                  | 1.77                  | 1.78                  | 1.78                   | 1.77      | 1.77      | 1.78      | 1.77                 | 1.78                 |
| <b>10-12</b>       | 1.77     | 1.77                  | 1.77                  | 1.77                  | 1.77                   | 1.77      | 1.77      | 1.77      | 1.76                 | 1.77                 |
| <b>11-12</b>       | 1.78     | 1.78                  | 1.78                  | 1.78                  | 1.78                   | 1.78      | 1.78      | 1.78      | 1.79                 | 1.77                 |



**Table S18.** The length of the different bonds in case of substitution on boron atom 9 (in Å) in *m*-carborane at the B3LYP/aug-cc-pVTZ level of theory

| <b>Substituent</b> | <b>H</b> | <b>NH<sub>2</sub></b> | <b>PH<sub>2</sub></b> | <b>CH<sub>3</sub></b> | <b>SiH<sub>3</sub></b> | <b>OH</b> | <b>SH</b> | <b>Cl</b> | <b>O<sup>-</sup></b> | <b>S<sup>-</sup></b> |
|--------------------|----------|-----------------------|-----------------------|-----------------------|------------------------|-----------|-----------|-----------|----------------------|----------------------|
| <b>Bond</b>        |          |                       |                       |                       |                        |           |           |           |                      |                      |
| <b>1-2</b>         | 1.69     | 1.69                  | 1.69                  | 1.69                  | 1.69                   | 1.69      | 1.69      | 1.69      | 1.69                 | 1.69                 |
| <b>1-3</b>         | 1.69     | 1.69                  | 1.69                  | 1.69                  | 1.69                   | 1.69      | 1.69      | 1.69      | 1.68                 | 1.68                 |
| <b>1-4</b>         | 1.71     | 1.71                  | 1.71                  | 1.71                  | 1.71                   | 1.71      | 1.71      | 1.71      | 1.71                 | 1.71                 |
| <b>1-5</b>         | 1.71     | 1.70                  | 1.70                  | 1.71                  | 1.71                   | 1.70      | 1.70      | 1.71      | 1.72                 | 1.72                 |
| <b>1-6</b>         | 1.71     | 1.71                  | 1.71                  | 1.71                  | 1.71                   | 1.71      | 1.71      | 1.71      | 1.71                 | 1.71                 |
| <b>2-3</b>         | 1.78     | 1.79                  | 1.79                  | 1.78                  | 1.79                   | 1.79      | 1.79      | 1.78      | 1.78                 | 1.78                 |
| <b>2-6</b>         | 1.76     | 1.76                  | 1.76                  | 1.76                  | 1.76                   | 1.76      | 1.76      | 1.76      | 1.77                 | 1.76                 |
| <b>2-7</b>         | 1.69     | 1.69                  | 1.69                  | 1.69                  | 1.69                   | 1.69      | 1.69      | 1.69      | 1.69                 | 1.69                 |
| <b>2-11</b>        | 1.76     | 1.77                  | 1.76                  | 1.76                  | 1.76                   | 1.76      | 1.77      | 1.76      | 1.77                 | 1.76                 |
| <b>3-4</b>         | 1.76     | 1.76                  | 1.76                  | 1.76                  | 1.76                   | 1.76      | 1.76      | 1.76      | 1.76                 | 1.77                 |
| <b>3-7</b>         | 1.69     | 1.69                  | 1.69                  | 1.69                  | 1.69                   | 1.69      | 1.69      | 1.69      | 1.68                 | 1.68                 |
| <b>3-8</b>         | 1.76     | 1.76                  | 1.76                  | 1.76                  | 1.76                   | 1.76      | 1.76      | 1.76      | 1.76                 | 1.77                 |
| <b>4-5</b>         | 1.78     | 1.77                  | 1.78                  | 1.77                  | 1.78                   | 1.77      | 1.78      | 1.78      | 1.76                 | 1.76                 |
| <b>4-8</b>         | 1.77     | 1.77                  | 1.77                  | 1.77                  | 1.77                   | 1.77      | 1.77      | 1.77      | 1.77                 | 1.77                 |
| <b>4-9</b>         | 1.78     | 1.80                  | 1.78                  | 1.79                  | 1.78                   | 1.80      | 1.78      | 1.78      | 1.90                 | 1.84                 |
| <b>5-6</b>         | 1.78     | 1.77                  | 1.78                  | 1.78                  | 1.78                   | 1.78      | 1.78      | 1.78      | 1.79                 | 1.79                 |
| <b>5-9</b>         | 1.77     | 1.80                  | 1.78                  | 1.79                  | 1.78                   | 1.79      | 1.79      | 1.78      | 1.88                 | 1.83                 |
| <b>5-10</b>        | 1.77     | 1.77                  | 1.77                  | 1.77                  | 1.77                   | 1.78      | 1.77      | 1.77      | 1.77                 | 1.77                 |
| <b>6-10</b>        | 1.78     | 1.78                  | 1.78                  | 1.77                  | 1.78                   | 1.77      | 1.78      | 1.77      | 1.76                 | 1.77                 |
| <b>6-11</b>        | 1.77     | 1.77                  | 1.77                  | 1.76                  | 1.77                   | 1.76      | 1.77      | 1.77      | 1.75                 | 1.75                 |
| <b>7-8</b>         | 1.71     | 1.71                  | 1.71                  | 1.71                  | 1.71                   | 1.71      | 1.71      | 1.71      | 1.71                 | 1.71                 |
| <b>7-11</b>        | 1.71     | 1.71                  | 1.71                  | 1.71                  | 1.71                   | 1.71      | 1.71      | 1.71      | 1.71                 | 1.71                 |
| <b>7-12</b>        | 1.71     | 1.70                  | 1.71                  | 1.71                  | 1.71                   | 1.70      | 1.71      | 1.71      | 1.72                 | 1.72                 |
| <b>8-9</b>         | 1.78     | 1.80                  | 1.78                  | 1.79                  | 1.78                   | 1.79      | 1.79      | 1.78      | 1.90                 | 1.84                 |
| <b>8-12</b>        | 1.78     | 1.77                  | 1.77                  | 1.77                  | 1.78                   | 1.78      | 1.77      | 1.78      | 1.76                 | 1.76                 |
| <b>9-10</b>        | 1.79     | 1.80                  | 1.79                  | 1.80                  | 1.79                   | 1.80      | 1.79      | 1.79      | 1.92                 | 1.86                 |
| <b>9-12</b>        | 1.77     | 1.80                  | 1.78                  | 1.79                  | 1.78                   | 1.80      | 1.78      | 1.78      | 1.88                 | 1.83                 |
| <b>10-11</b>       | 1.78     | 1.78                  | 1.78                  | 1.77                  | 1.78                   | 1.77      | 1.78      | 1.77      | 1.76                 | 1.77                 |
| <b>10-12</b>       | 1.77     | 1.78                  | 1.77                  | 1.77                  | 1.77                   | 1.77      | 1.78      | 1.77      | 1.77                 | 1.77                 |
| <b>11-12</b>       | 1.78     | 1.77                  | 1.78                  | 1.78                  | 1.78                   | 1.78      | 1.78      | 1.78      | 1.79                 | 1.79                 |

**Table S19.** The length of the different bonds in case of substitution on boron atom 2 (in Å) in *p*-carborane at the B3LYP/aug-cc-pVTZ level of theory

| <b>Substituent</b> | <b>H</b> | <b>NH<sub>2</sub></b> | <b>PH<sub>2</sub></b> | <b>CH<sub>3</sub></b> | <b>SiH<sub>3</sub></b> | <b>OH</b> | <b>SH</b> | <b>Cl</b> | <b>O<sup>-</sup></b> | <b>S<sup>-</sup></b> |
|--------------------|----------|-----------------------|-----------------------|-----------------------|------------------------|-----------|-----------|-----------|----------------------|----------------------|
| <b>Bond</b>        |          |                       |                       |                       |                        |           |           |           |                      |                      |
| <b>1-2</b>         | 1.70     | 1.76                  | 1.72                  | 1.72                  | 1.72                   | 1.71      | 1.70      | 1.71      | 2.20                 | 1.84                 |
| <b>1-3</b>         | 1.70     | 1.69                  | 1.70                  | 1.70                  | 1.70                   | 1.71      | 1.71      | 1.71      | 1.66                 | 1.68                 |
| <b>1-4</b>         | 1.70     | 1.69                  | 1.70                  | 1.70                  | 1.70                   | 1.71      | 1.71      | 1.71      | 1.69                 | 1.70                 |
| <b>1-5</b>         | 1.70     | 1.69                  | 1.70                  | 1.70                  | 1.70                   | 1.71      | 1.71      | 1.71      | 1.69                 | 1.70                 |
| <b>1-6</b>         | 1.70     | 1.69                  | 1.70                  | 1.70                  | 1.70                   | 1.71      | 1.71      | 1.71      | 1.66                 | 1.68                 |
| <b>2-3</b>         | 1.78     | 1.80                  | 1.79                  | 1.80                  | 1.79                   | 1.81      | 1.80      | 1.79      | 2.03                 | 1.86                 |
| <b>2-6</b>         | 1.78     | 1.80                  | 1.79                  | 1.80                  | 1.79                   | 1.81      | 1.80      | 1.79      | 2.03                 | 1.86                 |
| <b>2-7</b>         | 1.76     | 1.78                  | 1.77                  | 1.78                  | 1.77                   | 1.78      | 1.77      | 1.77      | 1.79                 | 1.81                 |
| <b>2-11</b>        | 1.76     | 1.78                  | 1.77                  | 1.78                  | 1.77                   | 1.78      | 1.77      | 1.77      | 1.79                 | 1.81                 |
| <b>3-4</b>         | 1.78     | 1.78                  | 1.78                  | 1.78                  | 1.78                   | 1.77      | 1.77      | 1.78      | 1.79                 | 1.78                 |
| <b>3-7</b>         | 1.76     | 1.76                  | 1.76                  | 1.76                  | 1.76                   | 1.76      | 1.76      | 1.76      | 1.76                 | 1.76                 |
| <b>3-8</b>         | 1.76     | 1.76                  | 1.76                  | 1.76                  | 1.76                   | 1.75      | 1.76      | 1.76      | 1.76                 | 1.76                 |
| <b>4-5</b>         | 1.78     | 1.78                  | 1.78                  | 1.78                  | 1.78                   | 1.79      | 1.78      | 1.78      | 1.78                 | 1.78                 |
| <b>4-8</b>         | 1.76     | 1.76                  | 1.76                  | 1.76                  | 1.76                   | 1.76      | 1.76      | 1.76      | 1.74                 | 1.75                 |
| <b>4-9</b>         | 1.76     | 1.76                  | 1.76                  | 1.76                  | 1.76                   | 1.76      | 1.76      | 1.76      | 1.77                 | 1.76                 |
| <b>5-6</b>         | 1.78     | 1.78                  | 1.78                  | 1.78                  | 1.78                   | 1.77      | 1.77      | 1.78      | 1.79                 | 1.78                 |
| <b>5-9</b>         | 1.76     | 1.76                  | 1.76                  | 1.76                  | 1.76                   | 1.76      | 1.76      | 1.76      | 1.77                 | 1.76                 |
| <b>5-10</b>        | 1.76     | 1.76                  | 1.76                  | 1.76                  | 1.76                   | 1.76      | 1.76      | 1.76      | 1.74                 | 1.75                 |
| <b>6-10</b>        | 1.76     | 1.76                  | 1.76                  | 1.76                  | 1.76                   | 1.75      | 1.76      | 1.76      | 1.76                 | 1.76                 |
| <b>6-11</b>        | 1.76     | 1.76                  | 1.76                  | 1.76                  | 1.76                   | 1.76      | 1.76      | 1.76      | 1.76                 | 1.76                 |
| <b>7-8</b>         | 1.78     | 1.78                  | 1.78                  | 1.78                  | 1.78                   | 1.78      | 1.78      | 1.78      | 1.78                 | 1.79                 |
| <b>7-11</b>        | 1.78     | 1.77                  | 1.78                  | 1.78                  | 1.78                   | 1.79      | 1.79      | 1.79      | 1.82                 | 1.78                 |
| <b>7-12</b>        | 1.70     | 1.70                  | 1.70                  | 1.70                  | 1.70                   | 1.70      | 1.70      | 1.70      | 1.70                 | 1.71                 |
| <b>8-9</b>         | 1.78     | 1.78                  | 1.78                  | 1.78                  | 1.78                   | 1.78      | 1.78      | 1.78      | 1.78                 | 1.78                 |
| <b>8-12</b>        | 1.70     | 1.70                  | 1.70                  | 1.70                  | 1.70                   | 1.71      | 1.70      | 1.70      | 1.71                 | 1.70                 |
| <b>9-10</b>        | 1.78     | 1.78                  | 1.78                  | 1.78                  | 1.78                   | 1.78      | 1.78      | 1.78      | 1.78                 | 1.78                 |
| <b>9-12</b>        | 1.70     | 1.70                  | 1.70                  | 1.70                  | 1.70                   | 1.71      | 1.71      | 1.71      | 1.70                 | 1.71                 |
| <b>10-11</b>       | 1.78     | 1.78                  | 1.78                  | 1.78                  | 1.78                   | 1.78      | 1.78      | 1.78      | 1.78                 | 1.79                 |
| <b>10-12</b>       | 1.70     | 1.70                  | 1.70                  | 1.70                  | 1.70                   | 1.71      | 1.70      | 1.70      | 1.71                 | 1.70                 |
| <b>11-12</b>       | 1.70     | 1.70                  | 1.70                  | 1.70                  | 1.70                   | 1.70      | 1.70      | 1.70      | 1.70                 | 1.71                 |

**Table S20.** The length of the different bonds in case of substitution on carbon atom 1 (in Å) in *o*-carborane at the B3LYP/aug-cc-pVTZ level of theory

| <b>Substituent</b> | <b>H</b> | <b>NH<sub>2</sub></b> | <b>PH<sub>2</sub></b> | <b>CH<sub>3</sub></b> | <b>SiH<sub>3</sub></b> | <b>OH</b> | <b>SH</b> | <b>Cl</b> | <b>O<sup>-</sup></b> | <b>S<sup>-</sup></b> |
|--------------------|----------|-----------------------|-----------------------|-----------------------|------------------------|-----------|-----------|-----------|----------------------|----------------------|
| <b>Bond</b>        |          |                       |                       |                       |                        |           |           |           |                      |                      |
| <b>1-2</b>         | 1.62     | 1.68                  | 1.65                  | 1.64                  | 1.65                   | 1.66      | 1.66      | 1.64      | 2.29                 | 1.75                 |
| <b>1-3</b>         | 1.72     | 1.72                  | 1.72                  | 1.73                  | 1.72                   | 1.73      | 1.73      | 1.73      | 1.99                 | 1.76                 |
| <b>1-4</b>         | 1.69     | 1.71                  | 1.71                  | 1.70                  | 1.71                   | 1.69      | 1.70      | 1.70      | 1.64                 | 1.72                 |
| <b>1-5</b>         | 1.69     | 1.71                  | 1.71                  | 1.70                  | 1.71                   | 1.70      | 1.71      | 1.70      | 1.64                 | 1.72                 |
| <b>1-6</b>         | 1.72     | 1.72                  | 1.72                  | 1.73                  | 1.72                   | 1.72      | 1.72      | 1.73      | 1.99                 | 1.76                 |
| <b>2-3</b>         | 1.72     | 1.70                  | 1.71                  | 1.71                  | 1.71                   | 1.70      | 1.71      | 1.72      | 1.65                 | 1.69                 |
| <b>2-6</b>         | 1.72     | 1.70                  | 1.71                  | 1.71                  | 1.71                   | 1.72      | 1.71      | 1.72      | 1.65                 | 1.69                 |
| <b>2-7</b>         | 1.69     | 1.68                  | 1.69                  | 1.69                  | 1.69                   | 1.69      | 1.69      | 1.69      | 1.67                 | 1.69                 |
| <b>2-11</b>        | 1.69     | 1.68                  | 1.69                  | 1.69                  | 1.69                   | 1.69      | 1.69      | 1.69      | 1.67                 | 1.69                 |
| <b>3-4</b>         | 1.77     | 1.78                  | 1.78                  | 1.77                  | 1.77                   | 1.78      | 1.78      | 1.78      | 1.80                 | 1.77                 |
| <b>3-7</b>         | 1.77     | 1.78                  | 1.78                  | 1.77                  | 1.78                   | 1.77      | 1.78      | 1.77      | 1.79                 | 1.78                 |
| <b>3-8</b>         | 1.76     | 1.76                  | 1.76                  | 1.76                  | 1.76                   | 1.75      | 1.76      | 1.76      | 1.77                 | 1.77                 |
| <b>4-5</b>         | 1.78     | 1.77                  | 1.77                  | 1.77                  | 1.77                   | 1.78      | 1.78      | 1.79      | 1.88                 | 1.78                 |
| <b>4-8</b>         | 1.78     | 1.77                  | 1.77                  | 1.78                  | 1.77                   | 1.78      | 1.78      | 1.78      | 1.78                 | 1.78                 |
| <b>4-9</b>         | 1.77     | 1.77                  | 1.77                  | 1.77                  | 1.77                   | 1.77      | 1.78      | 1.77      | 1.79                 | 1.78                 |
| <b>5-6</b>         | 1.77     | 1.78                  | 1.78                  | 1.77                  | 1.77                   | 1.77      | 1.78      | 1.78      | 1.80                 | 1.77                 |
| <b>5-9</b>         | 1.77     | 1.77                  | 1.77                  | 1.77                  | 1.77                   | 1.77      | 1.77      | 1.77      | 1.79                 | 1.78                 |
| <b>5-10</b>        | 1.78     | 1.77                  | 1.77                  | 1.78                  | 1.77                   | 1.77      | 1.77      | 1.78      | 1.78                 | 1.78                 |
| <b>6-10</b>        | 1.76     | 1.76                  | 1.76                  | 1.76                  | 1.76                   | 1.76      | 1.76      | 1.76      | 1.77                 | 1.77                 |
| <b>6-11</b>        | 1.77     | 1.78                  | 1.78                  | 1.77                  | 1.78                   | 1.78      | 1.78      | 1.77      | 1.79                 | 1.78                 |
| <b>7-8</b>         | 1.78     | 1.78                  | 1.78                  | 1.77                  | 1.77                   | 1.78      | 1.78      | 1.78      | 1.76                 | 1.77                 |
| <b>7-11</b>        | 1.78     | 1.77                  | 1.78                  | 1.78                  | 1.78                   | 1.78      | 1.78      | 1.78      | 1.77                 | 1.77                 |
| <b>7-12</b>        | 1.77     | 1.77                  | 1.77                  | 1.77                  | 1.77                   | 1.77      | 1.77      | 1.77      | 1.78                 | 1.77                 |
| <b>8-9</b>         | 1.79     | 1.78                  | 1.79                  | 1.79                  | 1.79                   | 1.79      | 1.79      | 1.79      | 1.79                 | 1.78                 |
| <b>8-12</b>        | 1.79     | 1.79                  | 1.79                  | 1.79                  | 1.79                   | 1.79      | 1.79      | 1.79      | 1.78                 | 1.79                 |
| <b>9-10</b>        | 1.79     | 1.78                  | 1.79                  | 1.79                  | 1.79                   | 1.78      | 1.79      | 1.79      | 1.79                 | 1.78                 |
| <b>9-12</b>        | 1.78     | 1.77                  | 1.78                  | 1.78                  | 1.78                   | 1.78      | 1.78      | 1.78      | 1.77                 | 1.78                 |
| <b>10-11</b>       | 1.78     | 1.78                  | 1.78                  | 1.77                  | 1.77                   | 1.78      | 1.78      | 1.78      | 1.76                 | 1.77                 |
| <b>10-12</b>       | 1.79     | 1.79                  | 1.79                  | 1.79                  | 1.79                   | 1.79      | 1.79      | 1.79      | 1.78                 | 1.79                 |
| <b>11-12</b>       | 1.77     | 1.77                  | 1.77                  | 1.77                  | 1.77                   | 1.77      | 1.77      | 1.77      | 1.78                 | 1.77                 |

**Table S21.** The length of the different bonds in case of substitution on carbon atom 1 (in Å) in *m*-carborane at the B3LYP/aug-cc-pVTZ level of theory

| <b>Substituent</b> | <b>H</b> | <b>NH<sub>2</sub></b> | <b>PH<sub>2</sub></b> | <b>CH<sub>3</sub></b> | <b>SiH<sub>3</sub></b> | <b>OH</b> | <b>SH</b> | <b>Cl</b> | <b>O<sup>-</sup></b> | <b>S<sup>-</sup></b> |
|--------------------|----------|-----------------------|-----------------------|-----------------------|------------------------|-----------|-----------|-----------|----------------------|----------------------|
| <b>Bond</b>        |          |                       |                       |                       |                        |           |           |           |                      |                      |
| <b>1-2</b>         | 1.69     | 1.71                  | 1.70                  | 1.70                  | 1.70                   | 1.70      | 1.70      | 1.70      | 1.77                 | 1.72                 |
| <b>1-3</b>         | 1.69     | 1.71                  | 1.71                  | 1.70                  | 1.70                   | 1.70      | 1.70      | 1.70      | 1.77                 | 1.72                 |
| <b>1-4</b>         | 1.71     | 1.71                  | 1.72                  | 1.72                  | 1.72                   | 1.73      | 1.73      | 1.72      | 1.80                 | 1.75                 |
| <b>1-5</b>         | 1.71     | 1.74                  | 1.72                  | 1.72                  | 1.73                   | 1.70      | 1.71      | 1.71      | 1.78                 | 1.75                 |
| <b>1-6</b>         | 1.71     | 1.71                  | 1.73                  | 1.72                  | 1.72                   | 1.73      | 1.73      | 1.72      | 1.79                 | 1.75                 |
| <b>2-3</b>         | 1.78     | 1.77                  | 1.78                  | 1.78                  | 1.78                   | 1.79      | 1.79      | 1.79      | 1.77                 | 1.77                 |
| <b>2-6</b>         | 1.76     | 1.77                  | 1.76                  | 1.76                  | 1.76                   | 1.76      | 1.76      | 1.77      | 1.76                 | 1.75                 |
| <b>2-7</b>         | 1.69     | 1.69                  | 1.69                  | 1.69                  | 1.69                   | 1.69      | 1.69      | 1.69      | 1.69                 | 1.70                 |
| <b>2-11</b>        | 1.76     | 1.76                  | 1.76                  | 1.76                  | 1.76                   | 1.77      | 1.76      | 1.76      | 1.77                 | 1.77                 |
| <b>3-4</b>         | 1.76     | 1.77                  | 1.76                  | 1.76                  | 1.76                   | 1.76      | 1.76      | 1.77      | 1.76                 | 1.75                 |
| <b>3-7</b>         | 1.69     | 1.69                  | 1.68                  | 1.69                  | 1.69                   | 1.69      | 1.69      | 1.69      | 1.69                 | 1.70                 |
| <b>3-8</b>         | 1.76     | 1.76                  | 1.76                  | 1.76                  | 1.76                   | 1.77      | 1.77      | 1.76      | 1.77                 | 1.77                 |
| <b>4-5</b>         | 1.78     | 1.77                  | 1.78                  | 1.77                  | 1.77                   | 1.78      | 1.78      | 1.78      | 1.77                 | 1.77                 |
| <b>4-8</b>         | 1.77     | 1.77                  | 1.77                  | 1.76                  | 1.77                   | 1.76      | 1.76      | 1.77      | 1.76                 | 1.77                 |
| <b>4-9</b>         | 1.78     | 1.78                  | 1.78                  | 1.77                  | 1.78                   | 1.77      | 1.77      | 1.77      | 1.77                 | 1.78                 |
| <b>5-6</b>         | 1.78     | 1.77                  | 1.77                  | 1.77                  | 1.77                   | 1.78      | 1.78      | 1.78      | 1.77                 | 1.77                 |
| <b>5-9</b>         | 1.77     | 1.76                  | 1.77                  | 1.77                  | 1.77                   | 1.77      | 1.78      | 1.77      | 1.78                 | 1.78                 |
| <b>5-10</b>        | 1.77     | 1.76                  | 1.77                  | 1.77                  | 1.77                   | 1.77      | 1.78      | 1.77      | 1.78                 | 1.78                 |
| <b>6-10</b>        | 1.78     | 1.78                  | 1.78                  | 1.77                  | 1.78                   | 1.77      | 1.77      | 1.77      | 1.77                 | 1.78                 |
| <b>6-11</b>        | 1.77     | 1.76                  | 1.76                  | 1.76                  | 1.77                   | 1.76      | 1.76      | 1.77      | 1.76                 | 1.77                 |
| <b>7-8</b>         | 1.71     | 1.71                  | 1.71                  | 1.71                  | 1.71                   | 1.71      | 1.71      | 1.71      | 1.70                 | 1.70                 |
| <b>7-11</b>        | 1.71     | 1.71                  | 1.71                  | 1.71                  | 1.71                   | 1.71      | 1.71      | 1.71      | 1.70                 | 1.70                 |
| <b>7-12</b>        | 1.71     | 1.70                  | 1.71                  | 1.71                  | 1.71                   | 1.71      | 1.71      | 1.71      | 1.71                 | 1.70                 |
| <b>8-9</b>         | 1.78     | 1.78                  | 1.78                  | 1.77                  | 1.77                   | 1.77      | 1.77      | 1.77      | 1.76                 | 1.77                 |
| <b>8-12</b>        | 1.78     | 1.78                  | 1.78                  | 1.78                  | 1.78                   | 1.78      | 1.78      | 1.78      | 1.78                 | 1.78                 |
| <b>9-10</b>        | 1.79     | 1.79                  | 1.79                  | 1.79                  | 1.79                   | 1.79      | 1.79      | 1.79      | 1.78                 | 1.78                 |
| <b>9-12</b>        | 1.77     | 1.77                  | 1.77                  | 1.77                  | 1.77                   | 1.77      | 1.77      | 1.77      | 1.77                 | 1.77                 |
| <b>10-11</b>       | 1.78     | 1.78                  | 1.77                  | 1.77                  | 1.77                   | 1.77      | 1.77      | 1.77      | 1.76                 | 1.77                 |
| <b>10-12</b>       | 1.77     | 1.77                  | 1.77                  | 1.77                  | 1.77                   | 1.77      | 1.77      | 1.77      | 1.77                 | 1.77                 |
| <b>11-12</b>       | 1.78     | 1.78                  | 1.78                  | 1.78                  | 1.78                   | 1.78      | 1.78      | 1.78      | 1.78                 | 1.78                 |

**Table S22.** The length of the different bonds in case of substitution on carbon atom 1 (in Å) in *p*-carborane at the B3LYP/aug-cc-pVTZ level of theory

| <b>Substituent</b> | <b>H</b> | <b>NH<sub>2</sub></b> | <b>PH<sub>2</sub></b> | <b>CH<sub>3</sub></b> | <b>SiH<sub>3</sub></b> | <b>OH</b> | <b>SH</b> | <b>Cl</b> | <b>O<sup>-</sup></b> | <b>S<sup>-</sup></b> |
|--------------------|----------|-----------------------|-----------------------|-----------------------|------------------------|-----------|-----------|-----------|----------------------|----------------------|
| <b>Bond</b>        |          |                       |                       |                       |                        |           |           |           |                      |                      |
| <b>1-2</b>         | 1.70     | 1.71                  | 1.72                  | 1.71                  | 1.72                   | 1.70      | 1.73      | 1.71      | 1.79                 | 1.74                 |
| <b>1-3</b>         | 1.70     | 1.72                  | 1.71                  | 1.72                  | 1.72                   | 1.72      | 1.71      | 1.71      | 1.79                 | 1.74                 |
| <b>1-4</b>         | 1.70     | 1.73                  | 1.72                  | 1.71                  | 1.72                   | 1.72      | 1.73      | 1.71      | 1.79                 | 1.74                 |
| <b>1-5</b>         | 1.70     | 1.70                  | 1.71                  | 1.72                  | 1.71                   | 1.71      | 1.71      | 1.71      | 1.79                 | 1.74                 |
| <b>1-6</b>         | 1.70     | 1.73                  | 1.72                  | 1.72                  | 1.72                   | 1.73      | 1.71      | 1.71      | 1.79                 | 1.74                 |
| <b>2-3</b>         | 1.78     | 1.79                  | 1.78                  | 1.78                  | 1.78                   | 1.78      | 1.78      | 1.79      | 1.78                 | 1.77                 |
| <b>2-6</b>         | 1.78     | 1.77                  | 1.78                  | 1.78                  | 1.78                   | 1.78      | 1.78      | 1.79      | 1.78                 | 1.77                 |
| <b>2-7</b>         | 1.76     | 1.76                  | 1.76                  | 1.76                  | 1.76                   | 1.76      | 1.76      | 1.76      | 1.76                 | 1.76                 |
| <b>2-11</b>        | 1.76     | 1.77                  | 1.76                  | 1.76                  | 1.76                   | 1.76      | 1.76      | 1.76      | 1.76                 | 1.76                 |
| <b>3-4</b>         | 1.78     | 1.77                  | 1.78                  | 1.77                  | 1.78                   | 1.78      | 1.78      | 1.79      | 1.78                 | 1.77                 |
| <b>3-7</b>         | 1.76     | 1.76                  | 1.76                  | 1.76                  | 1.76                   | 1.76      | 1.77      | 1.76      | 1.76                 | 1.76                 |
| <b>3-8</b>         | 1.76     | 1.77                  | 1.76                  | 1.76                  | 1.76                   | 1.76      | 1.77      | 1.76      | 1.76                 | 1.76                 |
| <b>4-5</b>         | 1.78     | 1.78                  | 1.78                  | 1.78                  | 1.78                   | 1.79      | 1.78      | 1.79      | 1.78                 | 1.77                 |
| <b>4-8</b>         | 1.76     | 1.76                  | 1.76                  | 1.76                  | 1.76                   | 1.76      | 1.76      | 1.76      | 1.76                 | 1.76                 |
| <b>4-9</b>         | 1.76     | 1.75                  | 1.76                  | 1.76                  | 1.76                   | 1.76      | 1.76      | 1.76      | 1.76                 | 1.76                 |
| <b>5-6</b>         | 1.78     | 1.78                  | 1.78                  | 1.77                  | 1.78                   | 1.78      | 1.79      | 1.79      | 1.78                 | 1.77                 |
| <b>5-9</b>         | 1.76     | 1.77                  | 1.77                  | 1.76                  | 1.76                   | 1.76      | 1.76      | 1.76      | 1.76                 | 1.76                 |
| <b>5-10</b>        | 1.76     | 1.77                  | 1.76                  | 1.76                  | 1.76                   | 1.77      | 1.76      | 1.76      | 1.76                 | 1.77                 |
| <b>6-10</b>        | 1.76     | 1.75                  | 1.76                  | 1.76                  | 1.76                   | 1.76      | 1.76      | 1.76      | 1.76                 | 1.77                 |
| <b>6-11</b>        | 1.76     | 1.76                  | 1.76                  | 1.76                  | 1.76                   | 1.76      | 1.76      | 1.76      | 1.76                 | 1.76                 |
| <b>7-8</b>         | 1.78     | 1.78                  | 1.78                  | 1.78                  | 1.78                   | 1.78      | 1.78      | 1.78      | 1.77                 | 1.77                 |
| <b>7-11</b>        | 1.78     | 1.78                  | 1.78                  | 1.78                  | 1.78                   | 1.78      | 1.78      | 1.78      | 1.77                 | 1.77                 |
| <b>7-12</b>        | 1.70     | 1.71                  | 1.70                  | 1.70                  | 1.70                   | 1.70      | 1.70      | 1.70      | 1.71                 | 1.70                 |
| <b>8-9</b>         | 1.78     | 1.78                  | 1.78                  | 1.78                  | 1.78                   | 1.78      | 1.78      | 1.78      | 1.77                 | 1.77                 |
| <b>8-12</b>        | 1.70     | 1.70                  | 1.70                  | 1.70                  | 1.70                   | 1.70      | 1.70      | 1.70      | 1.71                 | 1.70                 |
| <b>9-10</b>        | 1.78     | 1.78                  | 1.78                  | 1.78                  | 1.78                   | 1.78      | 1.78      | 1.78      | 1.77                 | 1.77                 |
| <b>9-12</b>        | 1.70     | 1.70                  | 1.70                  | 1.70                  | 1.70                   | 1.71      | 1.70      | 1.70      | 1.71                 | 1.70                 |
| <b>10-11</b>       | 1.78     | 1.78                  | 1.78                  | 1.78                  | 1.78                   | 1.78      | 1.78      | 1.78      | 1.77                 | 1.77                 |
| <b>10-12</b>       | 1.70     | 1.71                  | 1.70                  | 1.70                  | 1.70                   | 1.70      | 1.71      | 1.70      | 1.71                 | 1.70                 |
| <b>11-12</b>       | 1.70     | 1.70                  | 1.70                  | 1.70                  | 1.70                   | 1.70      | 1.70      | 1.70      | 1.71                 | 1.70                 |

**Table S23.** The length of the different bonds (in Å) in case of substitution with two substituents on the carbon atoms in *o*-carborane

| Substituent | H    | 1,2-NH <sub>2</sub> | 1,2-OH | 1,2-SH | 1-O,2-OH | 1-S,2-SH | 1,2-O | 1,2-S |
|-------------|------|---------------------|--------|--------|----------|----------|-------|-------|
| Bond        |      |                     |        |        |          |          |       |       |
| 1-2         | 1.62 | 1.90                | 1.78   | 1.83   | 1.91     | 2.15     | 2.13  | 2.19  |
| 1-3         | 1.72 | 1.71                | 1.72   | 1.72   | 1.82     | 1.82     | 1.79  | 1.79  |
| 1-4         | 1.69 | 1.68                | 1.68   | 1.68   | 1.70     | 1.65     | 1.70  | 1.70  |
| 1-5         | 1.69 | 1.68                | 1.69   | 1.69   | 1.70     | 1.65     | 1.70  | 1.70  |
| 1-6         | 1.72 | 1.71                | 1.72   | 1.72   | 1.82     | 1.82     | 1.79  | 1.79  |
| 2-3         | 1.72 | 1.71                | 1.71   | 1.72   | 1.70     | 1.68     | 1.79  | 1.79  |
| 2-6         | 1.72 | 1.71                | 1.72   | 1.72   | 1.70     | 1.69     | 1.79  | 1.79  |
| 2-7         | 1.69 | 1.68                | 1.69   | 1.68   | 1.68     | 1.66     | 1.70  | 1.70  |
| 2-11        | 1.69 | 1.68                | 1.69   | 1.69   | 1.68     | 1.66     | 1.70  | 1.70  |
| 3-4         | 1.78 | 1.79                | 1.79   | 1.79   | 1.76     | 1.79     | 1.78  | 1.78  |
| 3-7         | 1.78 | 1.79                | 1.79   | 1.79   | 1.77     | 1.82     | 1.78  | 1.78  |
| 3-8         | 1.76 | 1.77                | 1.77   | 1.77   | 1.75     | 1.79     | 1.77  | 1.77  |
| 4-5         | 1.78 | 1.77                | 1.78   | 1.78   | 1.81     | 1.80     | 1.79  | 1.79  |
| 4-8         | 1.78 | 1.77                | 1.77   | 1.77   | 1.78     | 1.77     | 1.77  | 1.77  |
| 4-9         | 1.77 | 1.77                | 1.77   | 1.77   | 1.78     | 1.78     | 1.78  | 1.78  |
| 5-6         | 1.78 | 1.79                | 1.78   | 1.79   | 1.76     | 1.79     | 1.78  | 1.78  |
| 5-9         | 1.77 | 1.77                | 1.77   | 1.77   | 1.78     | 1.78     | 1.78  | 1.78  |
| 5-10        | 1.78 | 1.77                | 1.77   | 1.77   | 1.78     | 1.77     | 1.77  | 1.77  |
| 6-10        | 1.76 | 1.77                | 1.76   | 1.78   | 1.75     | 1.79     | 1.77  | 1.77  |
| 6-11        | 1.78 | 1.79                | 1.78   | 1.79   | 1.77     | 1.82     | 1.78  | 1.78  |
| 7-8         | 1.78 | 1.77                | 1.77   | 1.77   | 1.78     | 1.76     | 1.77  | 1.77  |
| 7-11        | 1.78 | 1.77                | 1.78   | 1.78   | 1.78     | 1.77     | 1.79  | 1.79  |
| 7-12        | 1.77 | 1.77                | 1.77   | 1.77   | 1.77     | 1.77     | 1.78  | 1.78  |
| 8-9         | 1.79 | 1.79                | 1.79   | 1.79   | 1.78     | 1.78     | 1.78  | 1.78  |
| 8-12        | 1.79 | 1.79                | 1.79   | 1.79   | 1.78     | 1.79     | 1.78  | 1.78  |
| 9-10        | 1.79 | 1.79                | 1.79   | 1.79   | 1.78     | 1.78     | 1.78  | 1.78  |
| 9-12        | 1.78 | 1.76                | 1.77   | 1.77   | 1.79     | 1.76     | 1.77  | 1.77  |
| 10-11       | 1.78 | 1.77                | 1.77   | 1.77   | 1.78     | 1.76     | 1.77  | 1.77  |
| 10-12       | 1.79 | 1.79                | 1.79   | 1.79   | 1.78     | 1.79     | 1.78  | 1.78  |
| 11-12       | 1.77 | 1.77                | 1.77   | 1.77   | 1.77     | 1.78     | 1.78  | 1.78  |

**Table S24.** The length of the different bonds (in Å) in case of substitution with two substituents on the B9-B12 atoms in *o*-carborane

| Substituent  | H    | 9,12-NH <sub>2</sub> | 9,12-OH | 9,12-SH | 9-O,12-OH | 9-S,12-SH | 9,12-O | 9,12-S |
|--------------|------|----------------------|---------|---------|-----------|-----------|--------|--------|
| Bond         |      |                      |         |         |           |           |        |        |
| <b>1-2</b>   | 1.62 | 1.62                 | 1.63    | 1.62    | 1.63      | 1.64      | 1.61   | 1.63   |
| <b>1-3</b>   | 1.72 | 1.73                 | 1.72    | 1.72    | 1.71      | 1.71      | 1.72   | 1.71   |
| <b>1-4</b>   | 1.69 | 1.69                 | 1.69    | 1.69    | 1.70      | 1.70      | 1.71   | 1.70   |
| <b>1-5</b>   | 1.69 | 1.68                 | 1.69    | 1.69    | 1.70      | 1.70      | 1.71   | 1.70   |
| <b>1-6</b>   | 1.72 | 1.72                 | 1.71    | 1.72    | 1.71      | 1.71      | 1.72   | 1.71   |
| <b>2-3</b>   | 1.72 | 1.71                 | 1.72    | 1.71    | 1.72      | 1.72      | 1.72   | 1.71   |
| <b>2-6</b>   | 1.72 | 1.71                 | 1.72    | 1.71    | 1.72      | 1.72      | 1.72   | 1.71   |
| <b>2-7</b>   | 1.69 | 1.69                 | 1.69    | 1.70    | 1.70      | 1.69      | 1.71   | 1.70   |
| <b>2-11</b>  | 1.69 | 1.70                 | 1.69    | 1.69    | 1.70      | 1.69      | 1.71   | 1.70   |
| <b>3-4</b>   | 1.78 | 1.78                 | 1.77    | 1.78    | 1.78      | 1.78      | 1.77   | 1.77   |
| <b>3-7</b>   | 1.78 | 1.76                 | 1.78    | 1.77    | 1.77      | 1.77      | 1.77   | 1.77   |
| <b>3-8</b>   | 1.76 | 1.75                 | 1.74    | 1.76    | 1.74      | 1.75      | 1.75   | 1.76   |
| <b>4-5</b>   | 1.78 | 1.78                 | 1.78    | 1.79    | 1.77      | 1.77      | 1.75   | 1.77   |
| <b>4-8</b>   | 1.78 | 1.78                 | 1.77    | 1.77    | 1.77      | 1.77      | 1.78   | 1.77   |
| <b>4-9</b>   | 1.77 | 1.78                 | 1.79    | 1.78    | 1.90      | 1.83      | 1.90   | 1.82   |
| <b>5-6</b>   | 1.78 | 1.78                 | 1.77    | 1.78    | 1.78      | 1.78      | 1.77   | 1.77   |
| <b>5-9</b>   | 1.77 | 1.79                 | 1.80    | 1.78    | 1.90      | 1.83      | 1.90   | 1.82   |
| <b>5-10</b>  | 1.78 | 1.77                 | 1.77    | 1.78    | 1.77      | 1.77      | 1.78   | 1.77   |
| <b>6-10</b>  | 1.76 | 1.75                 | 1.75    | 1.76    | 1.74      | 1.75      | 1.75   | 1.76   |
| <b>6-11</b>  | 1.78 | 1.76                 | 1.78    | 1.77    | 1.77      | 1.77      | 1.77   | 1.77   |
| <b>7-8</b>   | 1.78 | 1.77                 | 1.77    | 1.77    | 1.77      | 1.77      | 1.78   | 1.77   |
| <b>7-11</b>  | 1.78 | 1.77                 | 1.78    | 1.78    | 1.79      | 1.79      | 1.75   | 1.77   |
| <b>7-12</b>  | 1.77 | 1.81                 | 1.79    | 1.79    | 1.79      | 1.78      | 1.90   | 1.82   |
| <b>8-9</b>   | 1.79 | 1.83                 | 1.80    | 1.80    | 1.90      | 1.86      | 1.91   | 1.85   |
| <b>8-12</b>  | 1.79 | 1.79                 | 1.81    | 1.79    | 1.81      | 1.80      | 1.91   | 1.85   |
| <b>9-10</b>  | 1.79 | 1.81                 | 1.80    | 1.81    | 1.90      | 1.86      | 1.91   | 1.85   |
| <b>9-12</b>  | 1.78 | 1.82                 | 1.81    | 1.80    | 1.86      | 1.85      | 1.98   | 1.94   |
| <b>10-11</b> | 1.78 | 1.77                 | 1.77    | 1.77    | 1.77      | 1.77      | 1.78   | 1.77   |
| <b>10-12</b> | 1.79 | 1.80                 | 1.82    | 1.79    | 1.81      | 1.80      | 1.91   | 1.85   |
| <b>11-12</b> | 1.77 | 1.80                 | 1.79    | 1.79    | 1.79      | 1.78      | 1.90   | 1.82   |

**Table S25.** The length of the different bonds (in Å) in case of substitution with two substituents on the B9-B10 atoms in *m*-carborane

| Substituent | H    | 9,10-NH <sub>2</sub> | 9,10-OH | 9,10-SH | 9-O,10-OH | 9-S,10-SH | 9,10-O | 9,10-S |
|-------------|------|----------------------|---------|---------|-----------|-----------|--------|--------|
| Bond        |      |                      |         |         |           |           |        |        |
| 1-2         | 1.69 | 1.69                 | 1.69    | 1.69    | 1.69      | 1.69      | 1.68   | 1.68   |
| 1-3         | 1.69 | 1.68                 | 1.69    | 1.69    | 1.68      | 1.68      | 1.68   | 1.68   |
| 1-4         | 1.71 | 1.70                 | 1.72    | 1.70    | 1.71      | 1.71      | 1.71   | 1.71   |
| 1-5         | 1.71 | 1.71                 | 1.69    | 1.71    | 1.69      | 1.71      | 1.74   | 1.74   |
| 1-6         | 1.71 | 1.71                 | 1.70    | 1.72    | 1.72      | 1.71      | 1.71   | 1.71   |
| 2-3         | 1.78 | 1.78                 | 1.78    | 1.78    | 1.79      | 1.79      | 1.78   | 1.78   |
| 2-6         | 1.76 | 1.76                 | 1.76    | 1.76    | 1.76      | 1.76      | 1.77   | 1.77   |
| 2-7         | 1.69 | 1.70                 | 1.69    | 1.69    | 1.69      | 1.69      | 1.68   | 1.68   |
| 2-11        | 1.76 | 1.76                 | 1.76    | 1.76    | 1.76      | 1.76      | 1.77   | 1.77   |
| 3-4         | 1.76 | 1.77                 | 1.76    | 1.76    | 1.76      | 1.77      | 1.77   | 1.77   |
| 3-7         | 1.69 | 1.69                 | 1.69    | 1.69    | 1.68      | 1.68      | 1.68   | 1.68   |
| 3-8         | 1.76 | 1.76                 | 1.76    | 1.77    | 1.76      | 1.77      | 1.77   | 1.77   |
| 4-5         | 1.78 | 1.78                 | 1.78    | 1.78    | 1.76      | 1.76      | 1.78   | 1.78   |
| 4-8         | 1.77 | 1.76                 | 1.77    | 1.77    | 1.77      | 1.77      | 1.76   | 1.76   |
| 4-9         | 1.78 | 1.80                 | 1.79    | 1.79    | 1.89      | 1.83      | 1.81   | 1.81   |
| 5-6         | 1.78 | 1.77                 | 1.78    | 1.78    | 1.78      | 1.78      | 1.78   | 1.78   |
| 5-9         | 1.77 | 1.79                 | 1.80    | 1.77    | 1.87      | 1.83      | 1.83   | 1.83   |
| 5-10        | 1.77 | 1.79                 | 1.79    | 1.79    | 1.80      | 1.78      | 1.83   | 1.83   |
| 6-10        | 1.78 | 1.80                 | 1.79    | 1.78    | 1.78      | 1.77      | 1.81   | 1.81   |
| 6-11        | 1.77 | 1.76                 | 1.76    | 1.77    | 1.76      | 1.76      | 1.76   | 1.76   |
| 7-8         | 1.71 | 1.69                 | 1.71    | 1.70    | 1.71      | 1.71      | 1.71   | 1.71   |
| 7-11        | 1.71 | 1.72                 | 1.70    | 1.71    | 1.72      | 1.71      | 1.71   | 1.71   |
| 7-12        | 1.71 | 1.70                 | 1.70    | 1.71    | 1.69      | 1.71      | 1.74   | 1.74   |
| 8-9         | 1.78 | 1.81                 | 1.79    | 1.79    | 1.89      | 1.83      | 1.81   | 1.81   |
| 8-12        | 1.78 | 1.78                 | 1.78    | 1.78    | 1.76      | 1.76      | 1.78   | 1.78   |
| 9-10        | 1.79 | 1.84                 | 1.82    | 1.81    | 1.88      | 1.87      | 1.98   | 1.98   |
| 9-12        | 1.77 | 1.78                 | 1.80    | 1.78    | 1.87      | 1.83      | 1.83   | 1.83   |
| 10-11       | 1.78 | 1.78                 | 1.80    | 1.78    | 1.78      | 1.77      | 1.81   | 1.81   |
| 10-12       | 1.77 | 1.81                 | 1.79    | 1.78    | 1.80      | 1.78      | 1.83   | 1.83   |
| 11-12       | 1.78 | 1.78                 | 1.78    | 1.78    | 1.78      | 1.78      | 1.78   | 1.78   |



**Table S26.** The length of the different bonds (in Å) in case of substitution with bulky adamantyl (Ad) and *tert*-butyl (*t*Bu) substituents in *o*-carborane systems at the B3LYP/6-31G\* level of theory

| Substituent | H    | 1,2-Ad | 9,12-Ad | 1,2- <i>t</i> Bu | 9,12- <i>t</i> Bu |
|-------------|------|--------|---------|------------------|-------------------|
| Bond        |      |        |         |                  |                   |
| 1-2         | 1.62 | 2.15   | 1.62    | 2.01             | 1.64              |
| 1-3         | 1.72 | 1.74   | 1.72    | 1.73             | 1.74              |
| 1-4         | 1.70 | 1.66   | 1.70    | 1.68             | 1.70              |
| 1-5         | 1.70 | 1.65   | 1.69    | 1.67             | 1.71              |
| 1-6         | 1.72 | 1.76   | 1.72    | 1.75             | 1.74              |
| 2-3         | 1.72 | 1.76   | 1.72    | 1.75             | 1.74              |
| 2-6         | 1.72 | 1.74   | 1.72    | 1.73             | 1.74              |
| 2-7         | 1.70 | 1.65   | 1.69    | 1.67             | 1.71              |
| 2-11        | 1.70 | 1.66   | 1.70    | 1.68             | 1.70              |
| 3-4         | 1.78 | 1.79   | 1.77    | 1.78             | 1.78              |
| 3-7         | 1.78 | 1.80   | 1.77    | 1.79             | 1.78              |
| 3-8         | 1.76 | 1.82   | 1.77    | 1.80             | 1.78              |
| 4-5         | 1.78 | 1.79   | 1.78    | 1.78             | 1.79              |
| 4-8         | 1.78 | 1.75   | 1.78    | 1.76             | 1.78              |
| 4-9         | 1.78 | 1.78   | 1.80    | 1.78             | 1.81              |
| 5-6         | 1.78 | 1.80   | 1.77    | 1.79             | 1.78              |
| 5-9         | 1.78 | 1.80   | 1.80    | 1.79             | 1.81              |
| 5-10        | 1.78 | 1.76   | 1.77    | 1.76             | 1.79              |
| 6-10        | 1.76 | 1.82   | 1.77    | 1.80             | 1.78              |
| 6-11        | 1.78 | 1.79   | 1.77    | 1.78             | 1.78              |
| 7-8         | 1.78 | 1.76   | 1.77    | 1.76             | 1.79              |
| 7-11        | 1.78 | 1.79   | 1.78    | 1.78             | 1.79              |
| 7-12        | 1.78 | 1.80   | 1.80    | 1.79             | 1.81              |
| 8-9         | 1.79 | 1.78   | 1.82    | 1.79             | 1.83              |
| 8-12        | 1.79 | 1.78   | 1.81    | 1.78             | 1.83              |
| 9-10        | 1.79 | 1.78   | 1.81    | 1.78             | 1.83              |
| 9-12        | 1.78 | 1.75   | 1.87    | 1.76             | 1.88              |
| 10-11       | 1.78 | 1.75   | 1.78    | 1.76             | 1.78              |
| 10-12       | 1.79 | 1.78   | 1.82    | 1.79             | 1.83              |
| 11-12       | 1.78 | 1.78   | 1.80    | 1.78             | 1.81              |

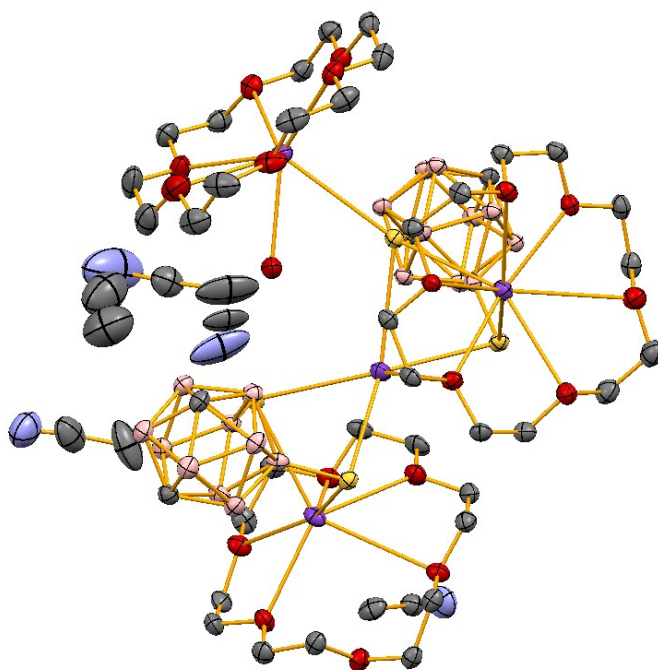

**Figure S3.** Solid state structure of **5'**. H atoms are omitted for clarity.

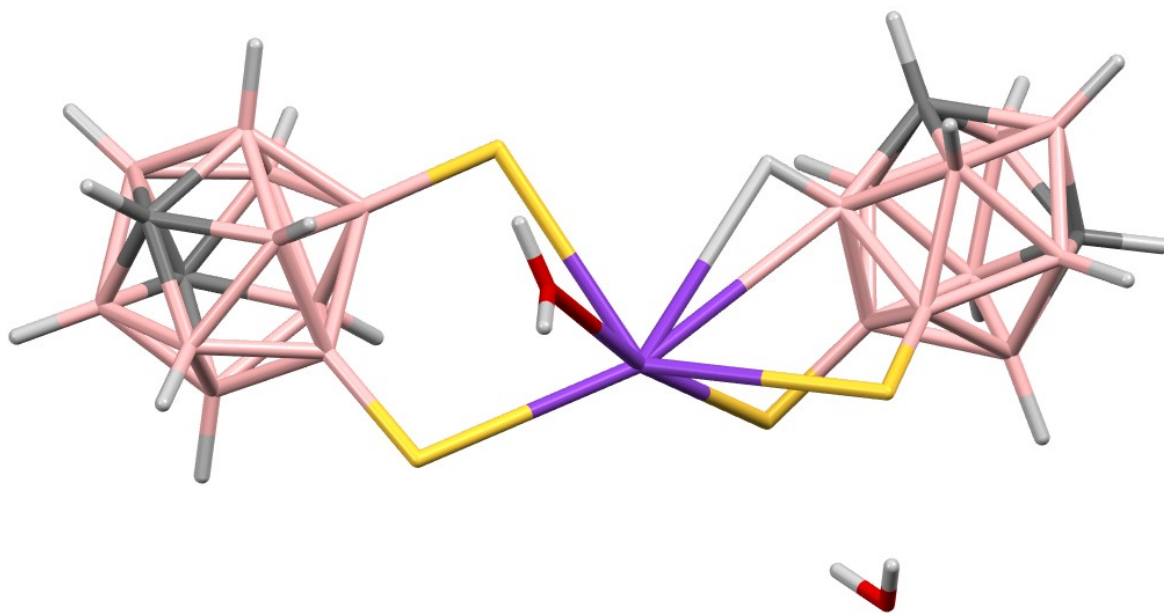

**Figure S4.** Capped Sticks view of **6**. Solvents and 2.2.2-cryptands were omitted for clarity

## Synthetic protocols and characterization

$S_2Cl_2$  is a toxic material! Please check the safety data sheet prior usage!

All manipulations (unless otherwise stated) were performed under a dry nitrogen atmosphere with exclusion of air and moisture using standard Schlenk techniques. All solvents were dried using standard procedures (toluene, THF,  $Et_2O$  over sodium/benzophenone; acetonitrile over  $CaH_2$ ,  $CH_2Cl_2$  over  $P_2O_5$ ) and freshly distilled prior to use. Carboranes were purchased from Zhengzhou Yuanli Biological Technology Co. Ltd, and used as received. The  $^1H$ ,  $^{13}C$ , and  $^{11}B$  NMR spectra were recorded on Bruker AMX 300, DRX 500 spectrometers, and Jeol JNM-ECZL500, using the deuterated solvents ( $CDCl_3$ ,  $DMSO-d_6$ ,  $CD_3OD$ ,  $CD_2Cl_2$ ,  $CD_3CN$ ) as internal lock.  $^{11}B$ -NMR and  $^{11}B\{^1H\}$ -NMR chemical shifts were referenced to the external  $BF_3 \cdot OEt_2$ . The spectrum simulation was performed with the built-in DNMR module of the Bruker TopSpin program. MestReNova (v.6.0.2-5475) program was used for the baseline correction in the  $^{11}B$ -NMR and  $^{11}B\{^1H\}$ -NMR spectra. Elemental analyses were performed with an Elementar vario MICRO cube analyzer and with a HEKAtech Euro EA CHNS elemental analyzer. IR measurements were performed on a Perkin Elmer Spectrum Two FT-IR spectrometer using the attenuated total reflection (ATR) technique on powdered samples. UV measurements were performed on UNICAM UV4-100 UV/Vis spectrophotometer.

### Synthesis of 9,12-(SH)<sub>2</sub>-1,2-closo-C<sub>2</sub>B<sub>10</sub>H<sub>10</sub> (1) and 9,10-(SH)<sub>2</sub>-1,7-closo-C<sub>2</sub>B<sub>10</sub>H<sub>10</sub> (2)

To a solution of 1.0 g (7 mmol) of *o*-carborane in 10 mL of CH<sub>2</sub>Cl<sub>2</sub> was added to a suspension of 3.7 g (28 mmol) of AlCl<sub>3</sub> and 5 mL of CH<sub>2</sub>Cl<sub>2</sub> at -50 °C. After that 1.89 g (14 mmol) of S<sub>2</sub>Cl<sub>2</sub> (S<sub>2</sub>Cl<sub>2</sub> is a toxic material, please check the safety data sheet prior usage) in 5 mL of CH<sub>2</sub>Cl<sub>2</sub> was added dropwise to the obtained suspension at -50 °C. After addition it was allowed to warm up slowly (30 min) and then it was heated up and allowed to boil for 12 h. After cooling, the mixture was poured into water. The precipitate obtained was filtered, washed with water. The product was suspended in a solution of 50 mg of NaOH in 50 mL methanol and allowed to stir. 200 mg of NaBH<sub>4</sub> was added in small portions to the reaction mixture, and after 2 h of stirring further 200 mg of NaBH<sub>4</sub> was added. After 24 hours of stirring, diluted HCl was added to the reaction mixture, until the pH reached 1-2. The raw product was extracted by 3 times using 10-10 mL of ethyl-acetate. After evaporation of the solvent, the raw product was subjected to flash column separation on silica using a mixture of hexane and ethyl-acetate (4:1) as eluent which afforded as white crystals. (1.2 g, 82 % yield)

<sup>1</sup>H NMR (500.13 MHz, CDCl<sub>3</sub>): δ 0.59 (s, 2H, SH), 1.69–3.05 (m, 8H, carb-BH) 3.52 (s, 2H, carb-CH) <sup>11</sup>B NMR (160.46 MHz, CDCl<sub>3</sub>): δ -16.5 (d, 2B, <sup>1</sup>J<sub>BH</sub>=178 Hz, carb-BH), -14.0 (d, 2B, <sup>1</sup>J<sub>BH</sub>=168 Hz, carb-BH), -6.6 (d, 2B, <sup>1</sup>J<sub>BH</sub>=154 Hz, carb-BH), 5.3 (s, 2B, carb-BH) <sup>11</sup>B{<sup>1</sup>H} NMR (160.46 MHz, CDCl<sub>3</sub>): δ -16.5 (s, 2B, carb-BH), -14.0 (s, 2B, carb-BH), -6.6 (s, 2B, carb-BH), 5.3 (s, 2B, carb-BH) <sup>13</sup>C{<sup>1</sup>H} NMR (125.77 MHz, CDCl<sub>3</sub>): δ 47.5 (s, carb-CH)

Elemental analysis [%]: calculated: C 11.53, H 5.80, S 30.78 found: C 11.83, H 5.64, S 31.84

Applying the same procedure, but starting from *m*-carborane, the corresponding 9,10-(SH)<sub>2</sub>-1,7-closo-C<sub>2</sub>B<sub>10</sub>H<sub>10</sub> carborane derivative can be obtained with similar yield (1.1 g, 76 % yield).

<sup>1</sup>H NMR (500.13 MHz, CDCl<sub>3</sub>): δ 0.57 (s, 2H, SH), 1.80–3.33 (m, 8H, carb-BH) 2.97 (s, 2H, carb-CH) <sup>11</sup>B NMR (160.33 MHz, CDCl<sub>3</sub>): δ -21.0 (d, 2B, <sup>1</sup>J<sub>BH</sub>=181 Hz, carb-BH), -13.2 (d, 2B, <sup>1</sup>J<sub>BH</sub>=170 Hz, carb-BH), -5.1 (d, 2B, <sup>1</sup>J<sub>BH</sub>=165 Hz, carb-BH), -1.8 (s, 2B, carb-BH) <sup>11</sup>B{<sup>1</sup>H} NMR (160.33 MHz, CDCl<sub>3</sub>): δ -21.0 (s, 2B, carb-BH), -13.2 (s, 2B, carb-BH), -5.1 (s, 2B, carb-BH), -1.8 (s, 2B, carb-BH) <sup>13</sup>C{<sup>1</sup>H} NMR (125.77 MHz, CDCl<sub>3</sub>): δ 52.7 (s, carb-CH) Elemental analysis [%]: calculated: C 11.53, H 5.80, S 30.78 found: C 11.81, H 5.64, S 29.96

### Synthesis of 9,10-(NH<sub>2</sub>)<sub>2</sub>-1,7-*closo*-C<sub>2</sub>B<sub>10</sub>H<sub>10</sub> (**3**)

For the hydrolysis of *N,N'*-(1,7-dicarba-*closo*-dodecaboran-9,10-diyl)bis(trifluoroacetamide) we followed the general process of hydrolysis *N*-(1,7-dicarba-*closo*-dodecaboran-9-yl)trifluoroacetamide.<sup>41</sup>

520 mg (1.4 mmol) *N,N'*-(1,7-dicarba-*closo*-dodecaboran-9,10-diyl)bis(trifluoroacetamide) was dissolved in the mixture of 6 mL methanol, 6 mL IPA and 7 mL THF and the solution of 2.68 g (67 mmol) NaOH in 30 mL distilled water was added. The mixture was stirred at room temperature. After 5 days of stirring, 20 mL distilled water was added to the reaction mixture and the solution was extracted by 3 times using 15-15 mL of dichloromethane. After evaporation of the solvent the product was obtained as brownish powder. (210 mg, 86 % yield)

<sup>1</sup>H NMR (500.13 MHz, CDCl<sub>3</sub>): δ 0.87 (s, 4H, NH<sub>2</sub>), 1.48–2.89 (m, 8H, carb-BH) 2.51 (s, 2H, carb-CH) <sup>11</sup>B NMR (160.46 MHz, CDCl<sub>3</sub>): δ -27.6 (d, 2B, <sup>1</sup>J<sub>BH</sub>=180 Hz, carb-BH), -17.1 (d, 2B, <sup>1</sup>J<sub>BH</sub>=164 Hz, carb-BH), -9.1 (d, 2B, <sup>1</sup>J<sub>BH</sub>=158 Hz, carb-BH), 2.9 (s, 2B, carb-BH) <sup>11</sup>B{<sup>1</sup>H} NMR (160.46 MHz, CDCl<sub>3</sub>): δ -27.6 (s, 2B, carb-BH), -17.1 (s, 2B, carb-BH), -9.1 (s, 2B, carb-BH), 2.9 (s, 2B, carb-BH) <sup>13</sup>C{<sup>1</sup>H} NMR (125.77 MHz, CDCl<sub>3</sub>): δ 44.9 (s, carb-CH)

Elemental analysis [%]: calculated: C 13.78, H 8.10, N 16.08 found: C 15.75, H 8.33, N 14.65

### Synthesis and characterization of **4**

To a solution of 50 mg (0.29 mmol) **3** in 1.5 mL EtOH was added dropwise to a solution of 20 mg (0.149 mmol) CuCl<sub>2</sub> in 1.5 mL of EtOH. The mixture was stirred at room temperature. A pale blue precipitate is observed during the reaction. After 3 hours of stirring, the precipitate obtained was filtered and washed with EtOH, yielding an analytical pure product. (60 mg, 84 % yield). Recrystallization from water at room temperature produced blue crystals suitable for SC-XRD. The low solubility of **4** (several solvents were tried such as water, DMSO, DMF, DCM) does not allow NMR characterization, however IR (**Figure S42**), UV (**Figure S43**) and elemental analysis data are in agreement with the chemical composition obtained by SC-XRD:

The absorption bands around 1568, cm<sup>-1</sup> are assigned to the asymmetric and symmetric ν(H–N–H) and ν(H–O–H) bending. The asymmetric and symmetric stretching modes of the amino group are observed in the range of 3300–3050 cm<sup>-1</sup>. The stretching of BH vertices appear around 2610 cm<sup>-1</sup>, meanwhile the carborane CH is around 3009 cm<sup>-1</sup> These results are consistent with the DFT-computed IR spectra.

Elemental analysis [%]: calculated: C 9.29, H 5.85, N 10.84, Cl 13.71, found: C 9.35, H 6.37, N 10.73, Cl 13.61

## Synthesis of 5

To a solution of 54 mg (0.48 mmol) KO<sup>t</sup>Bu and 133 mg (0.50 mmol) 18-crown-6 in 7 mL of THF was added dropwise to a solution of 50 mg (0.24 mmol) of 9,10-(S<sup>-</sup>)<sub>2</sub>-1,7-closo-C<sub>2</sub>B<sub>10</sub>H<sub>10</sub> in 5 mL of THF. A white precipitate is observed during the reaction. The suspension was stirred overnight at room temperature. After evaporation of the solvent, the white precipitate was washed with a few mL of Et<sub>2</sub>O, yielding an analytical pure product. (103 mg, 58% yield – calculated for dried powder, which contains 1.5 eq THF molecule based on the <sup>1</sup>H NMR spectra) Recrystallization from acetonitrile solution or acetonitrile-THF mixture at –30 °C afforded as white crystals.

<sup>1</sup>H NMR (499.71 MHz, DMSO-*d*<sub>6</sub>): δ 1.76 (m, THF), 2.66 (bs, 4H, carb-CH), 3.55 (s, 72H, OCH<sub>2</sub>), 3.60 (m, THF) <sup>1</sup>H NMR (499.77 MHz, CD<sub>3</sub>CN): δ 3.54 (s, 72H, OCH<sub>2</sub>) 3.69 (bs, 4H, carb-CH) <sup>11</sup>B NMR (160.33 MHz, CD<sub>3</sub>CN): δ –21.9 (d, 2B, <sup>1</sup>J<sub>BH</sub>=182 Hz, carb-BH), –16.6 (d, 2B, <sup>1</sup>J<sub>BH</sub>=165 Hz, carb-BH), –4.0 (d, 2B, <sup>1</sup>J<sub>BH</sub>=170 Hz, carb-BH), 4.1 (s, 2B, carb-BH) <sup>11</sup>B{<sup>1</sup>H} NMR (160.33 MHz, CD<sub>3</sub>CN): δ –21.9 (s, 2B, carb-BH), –16.6 (s, 2B, carb-BH), –4.0 (s, 2B, carb-BH), 4.1 (s, 2B, carb-BH) <sup>13</sup>C{<sup>1</sup>H} NMR (125.65 MHz, CD<sub>3</sub>CN): δ 71.00 (s, 18-crown-6), 71.02 (s, 18-crown-6)

Elemental analysis [%]: calculated (without solvent molecules): calculated: C 35.27, H 6.81, S 9.42 found: C, 34.05, H 6.82, S, 6.66

## Synthesis of 6

To a solution of 113 mg (1.0 mmol) KO<sup>t</sup>Bu and 380 mg (1.0 mmol) 2.2.2-Cryptand in 15 mL of THF was added dropwise to a solution of 50 mg (0.24 mmol) of 9,10-(S<sup>-</sup>)<sub>2</sub>-1,7-closo-C<sub>2</sub>B<sub>10</sub>H<sub>10</sub> in 5 mL of THF. A white precipitate is observed during the reaction. The suspension was stirred overnight at room temperature. After evaporation of the solvent, the white precipitate was washed with a few mL of Et<sub>2</sub>O, yielding an analytical pure product. (135 mg, 64% yield – calculated for dried powder, which contains 0.75 eq THF molecule based on the <sup>1</sup>H NMR spectra) Recrystallization from acetonitrile solution at –30 °C afforded as white crystals.

<sup>1</sup>H NMR (500.13 MHz, CD<sub>2</sub>Cl<sub>2</sub>): δ 1.81 (m, THF), 2.54 (t, 36H, <sup>3</sup>J<sub>HH</sub>= 4.6 Hz, NCH<sub>2</sub>), 3.34 (bs, 4H, carb-CH), 3.53 (t, 36H, <sup>3</sup>J<sub>HH</sub>= 4.6 Hz, OCH<sub>2</sub>CH<sub>2</sub>N), 3.59 (s, 36H, OCH<sub>2</sub>CH<sub>2</sub>O), 3.68 (m, THF) <sup>1</sup>H NMR (500.13 MHz, CD<sub>3</sub>OD): δ 1.87 (m, THF), 2.58 (t, 36H, <sup>3</sup>J<sub>HH</sub>= 4.5 Hz, NCH<sub>2</sub>), 3.16 (bs, 4H, carb-CH), 3.57 (t, 36H, <sup>3</sup>J<sub>HH</sub>= 4.6 Hz, OCH<sub>2</sub>CH<sub>2</sub>N), 3.62 (s, 36H, OCH<sub>2</sub>CH<sub>2</sub>O), 3.73 (m, THF) <sup>11</sup>B NMR (160.46 MHz, CD<sub>2</sub>Cl<sub>2</sub>): δ –21.0 (d, 2B, <sup>1</sup>J<sub>BH</sub>=184 Hz, carb-BH), –15.5 (d, 2B, <sup>1</sup>J<sub>BH</sub>=178 Hz, carb-BH), –2.7 (d, 2B, <sup>1</sup>J<sub>BH</sub>=174 Hz, carb-BH), 5.3 (s,

2B, carb-BH)  $^{11}\text{B}\{^1\text{H}\}$  NMR (160.46 MHz,  $\text{CD}_2\text{Cl}_2$ ):  $\delta$  -21.0 (s, 2B, carb-BH), -15.5 (s, 2B, carb-BH), -2.7 (s, 2B, carb-BH), 5.3 (s, 2B, carb-BH)  $^{11}\text{B}$  NMR (160.46 MHz,  $\text{CD}_3\text{OD}$ ):  $\delta$  -23.9 (d, 2B,  $^1J_{\text{BH}}=179$  Hz, carb-BH), -14.3 (d, 2B,  $^1J_{\text{BH}}=180$  Hz, carb-BH), -4.9 (d, 2B,  $^1J_{\text{BH}}=172$  Hz, carb-BH), 1.5 (s, 2B, carb-BH)  $^{11}\text{B}\{^1\text{H}\}$  NMR (160.46 MHz,  $\text{CD}_3\text{OD}$ ):  $\delta$  -23.9 (s, 2B, carb-BH), -14.3 (s, 2B, carb-BH), -4.9 (s, 2B, carb-BH), 1.5 (s, 2B, carb-BH)  $^{13}\text{C}\{^1\text{H}\}$  NMR (125.65 MHz,  $\text{CD}_2\text{Cl}_2$ ):  $\delta$  53.8 (s, overlap with the signal of  $\text{CD}_2\text{Cl}_2$ , 2.2.2-cryptand) 67.5 (s, 2.2.2-cryptand), 70.5 (s, 2.2.2-cryptand), the carb-CH signal probably overlap with the signal of  $\text{CD}_2\text{Cl}_2$  therefore the  $^{13}\text{C}$  NMR was measured in  $\text{CD}_3\text{OD}$  solvent.  $^{13}\text{C}\{^1\text{H}\}$  NMR (125.77 MHz,  $\text{CD}_3\text{OD}$ ):  $\delta$  52.0 (s, carb-CH), 55.1 (s, 2.2.2-cryptand) 68.8, (s, 2.2.2-cryptand) 71.6 (s, 2.2.2-cryptand)

Elemental analysis [%]: calculated (without solvent molecules): C 41.01, H, 7.60, N 4.95, S 7.55 found: C 39.06, H 7.37, N 4.27, S 3.87 Note: As the crystal structure of **6** contains substantial amount of solvent molecules, CHN measurements produced non-reproducible results.

## NMR spectra of the compounds

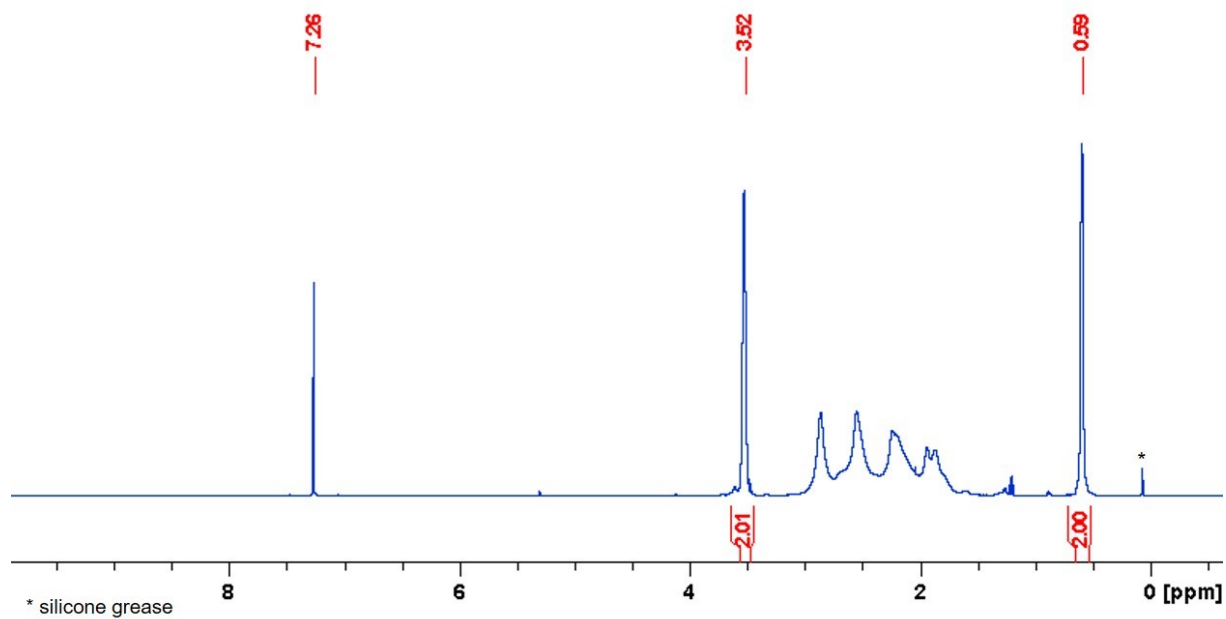

Figure S5.  $^1\text{H}$  NMR spectra of **1** in  $\text{CDCl}_3$

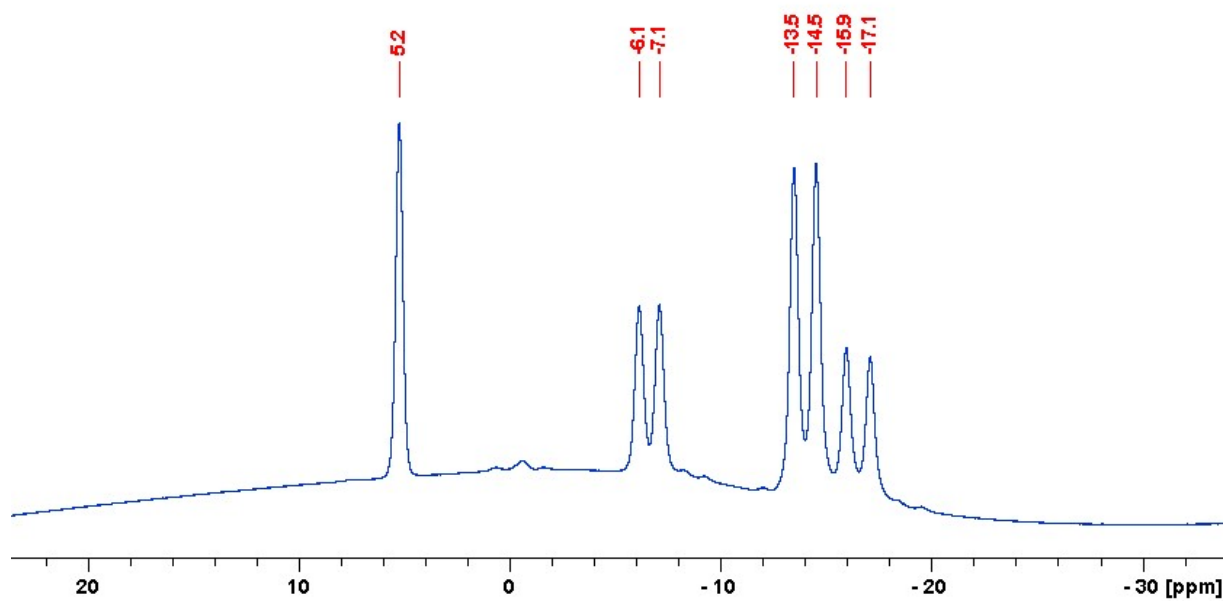

Figure S6.  $^{11}\text{B}$  NMR spectra of **1** in  $\text{CDCl}_3$



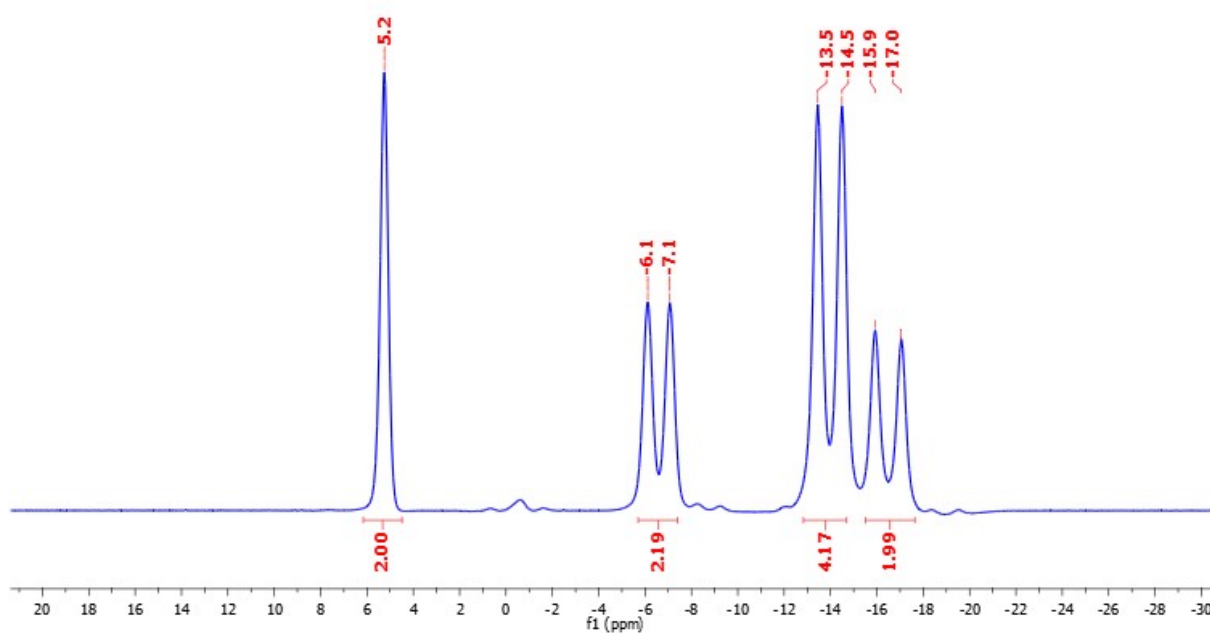

**Figure S7.**  $^{11}\text{B}$  NMR spectra of **1** in  $\text{CDCl}_3$  (MestReNova program was used for the baseline correction)

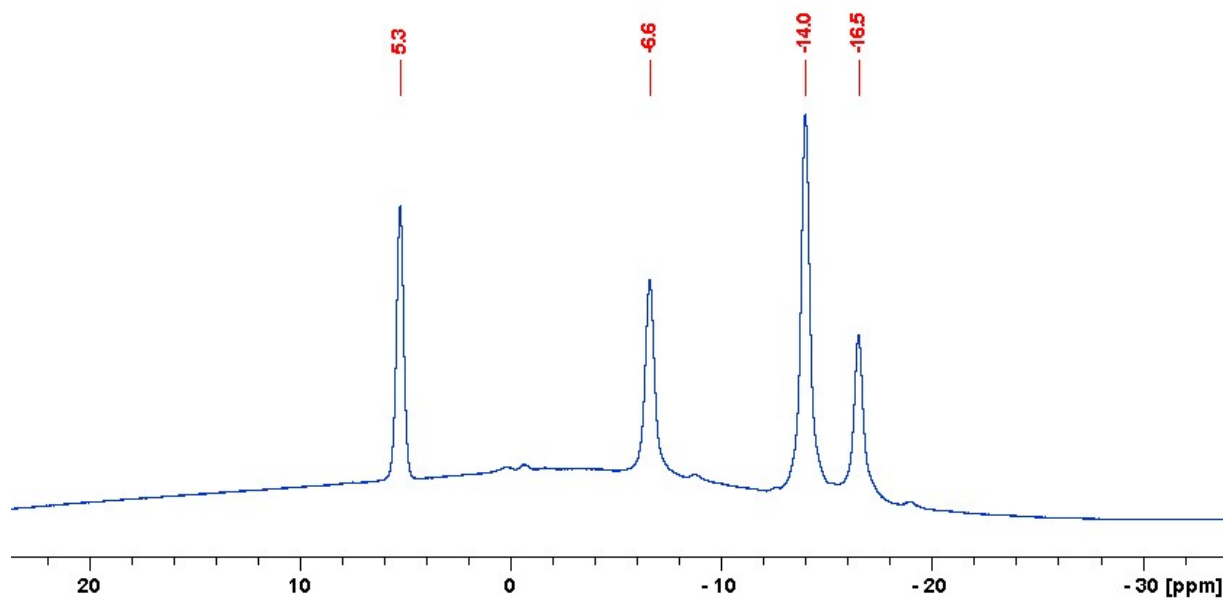

**Figure S8.**  $^{11}\text{B}\{^1\text{H}\}$  NMR spectra of **1** in  $\text{CDCl}_3$

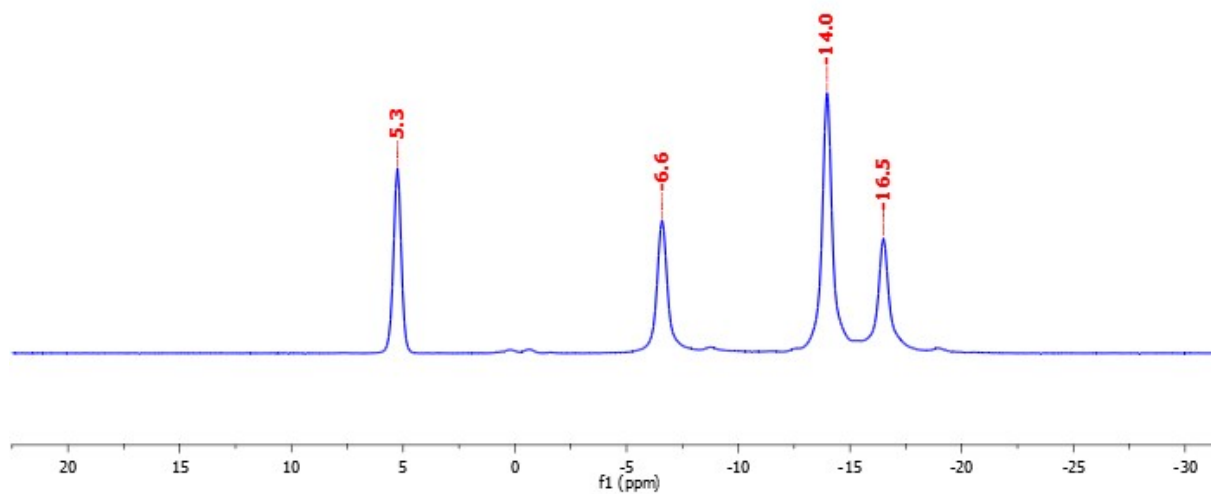

**Figure S9.**  $^{11}\text{B}\{^1\text{H}\}$  NMR spectra of **1** in  $\text{CDCl}_3$  (MestReNova program was used for the baseline correction)

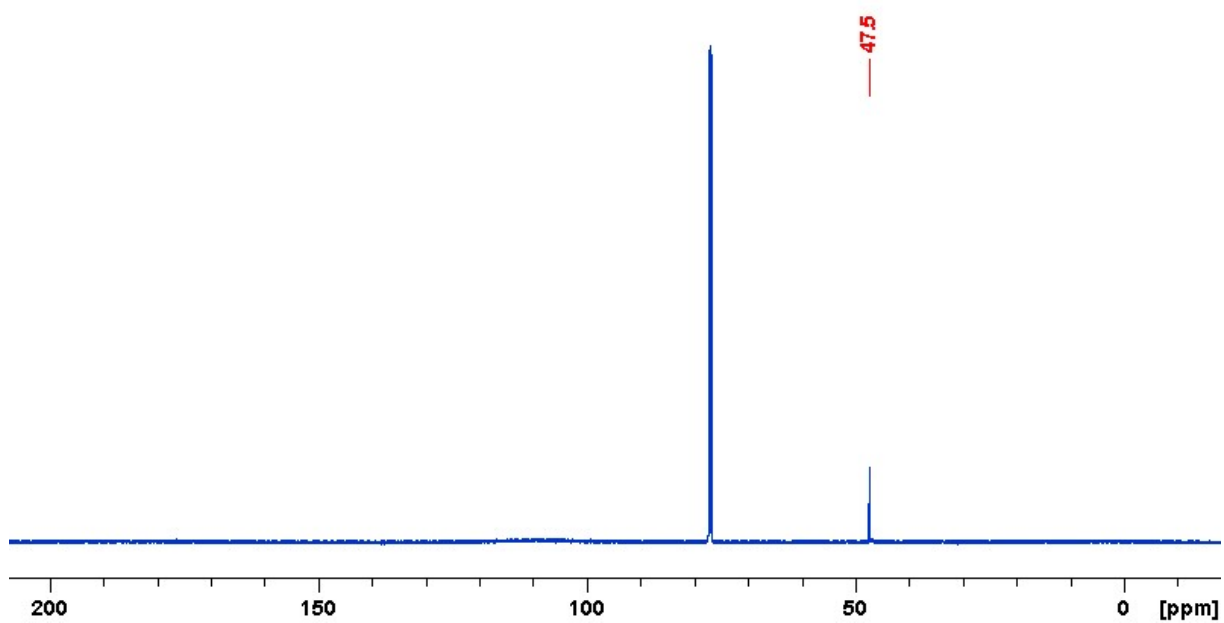

**Figure S10.**  $^{13}\text{C}\{^1\text{H}\}$  NMR spectra of **1** in  $\text{CDCl}_3$

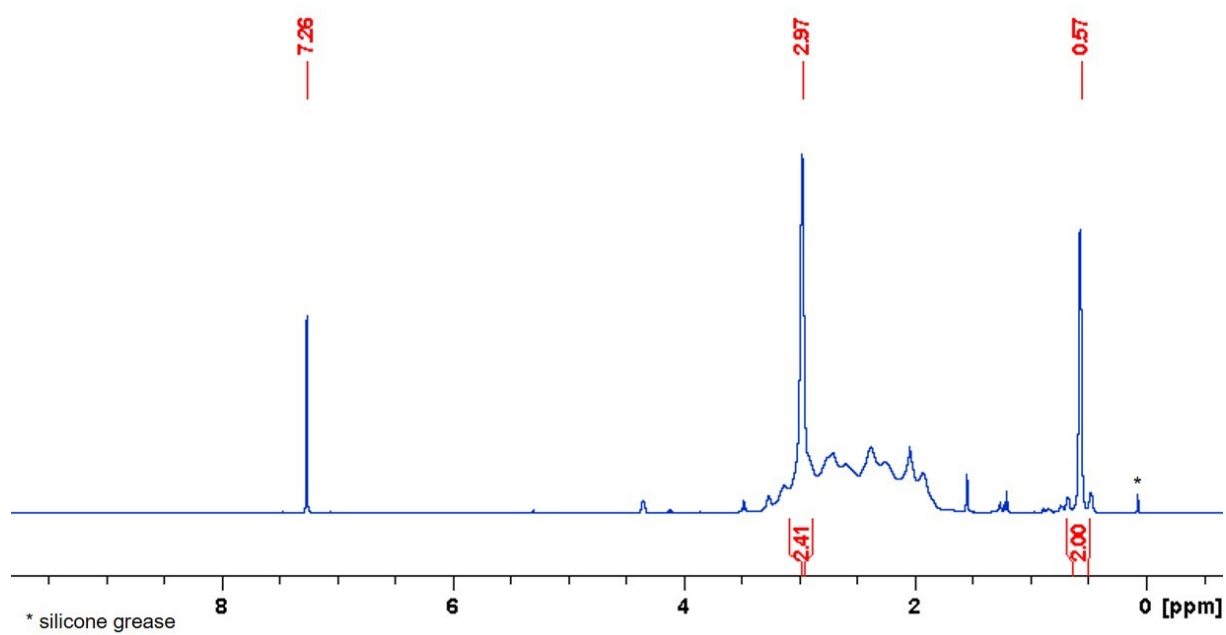

Figure S11.  $^1\text{H}$  NMR spectra of **2** in  $\text{CDCl}_3$

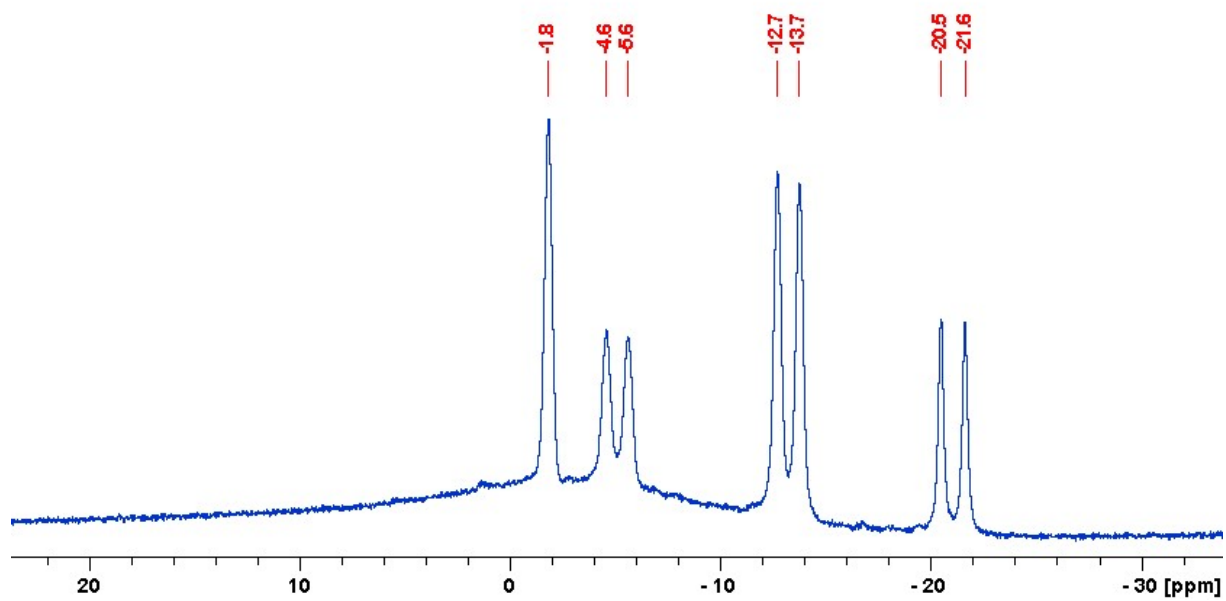

Figure S12.  $^{11}\text{B}$  NMR spectra of **2** in  $\text{CDCl}_3$

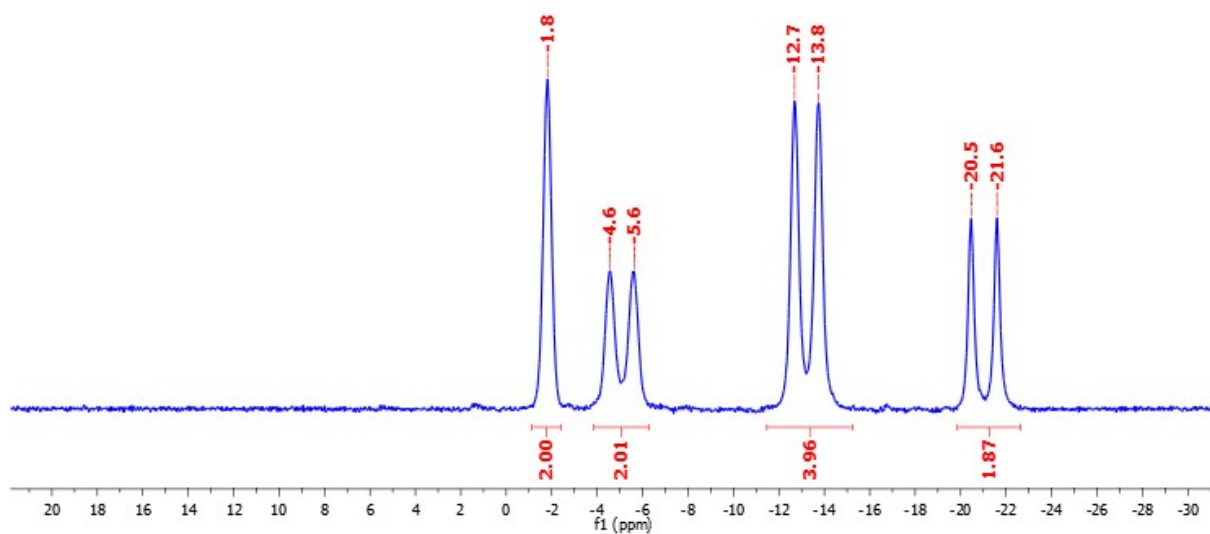

**Figure S13.**  $^{11}\text{B}$  NMR spectra of **2** in  $\text{CDCl}_3$  (MestReNova program was used for the baseline correction)

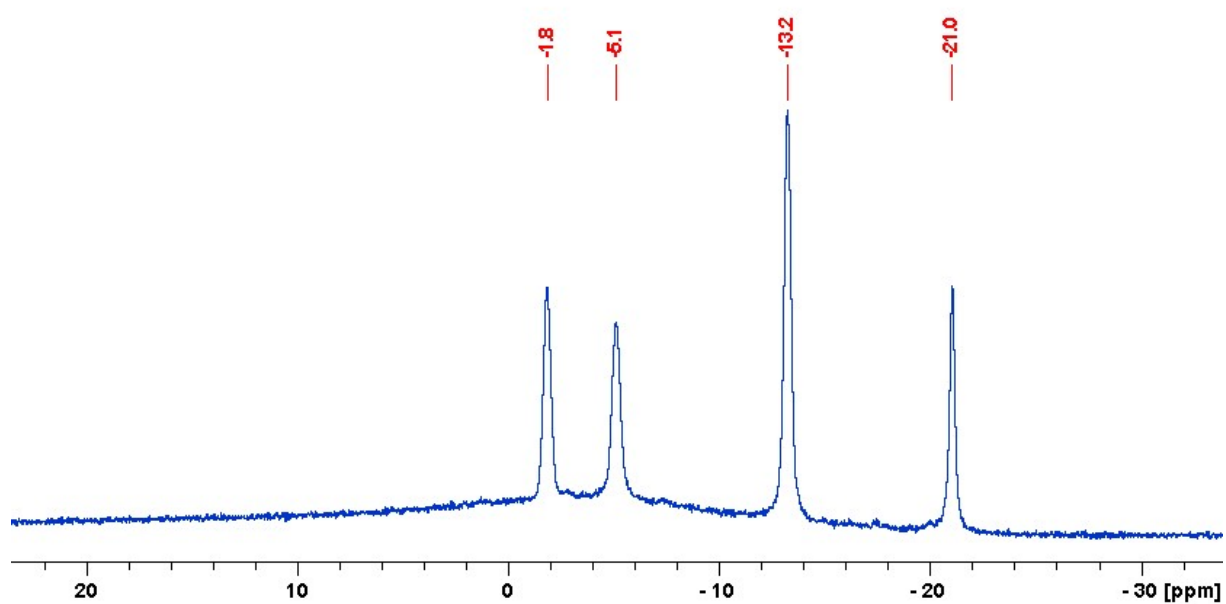

**Figure S14.**  $^{11}\text{B}\{^1\text{H}\}$  NMR spectra of **2** in  $\text{CDCl}_3$

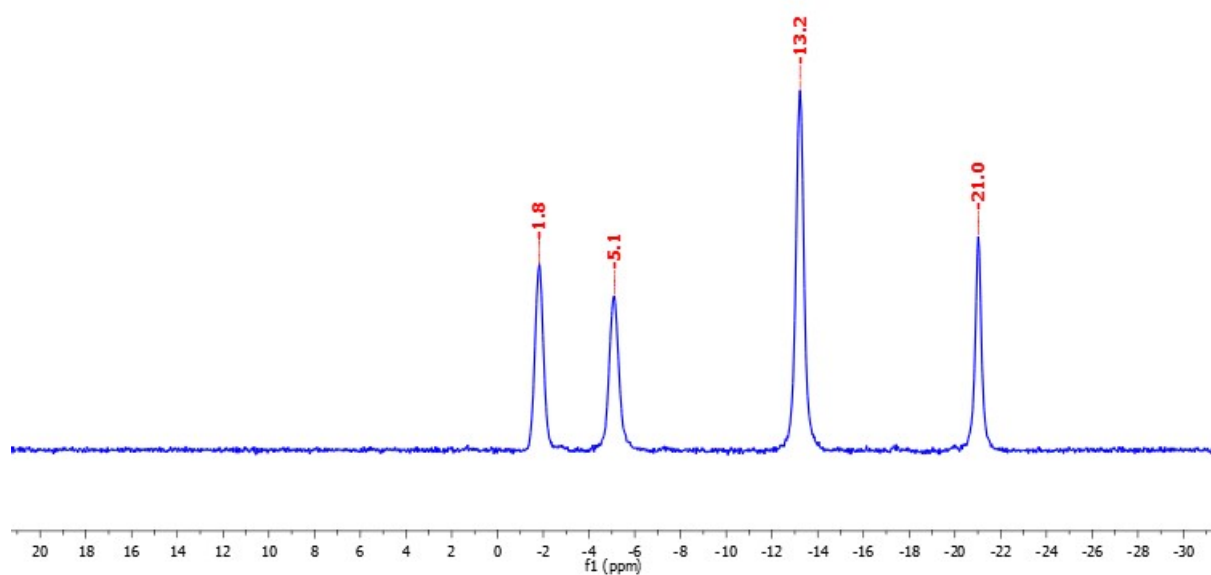

**Figure S15.**  $^{11}\text{B}\{^1\text{H}\}$  NMR spectra of **2** in  $\text{CDCl}_3$  (MestReNova program was used for the baseline correction)

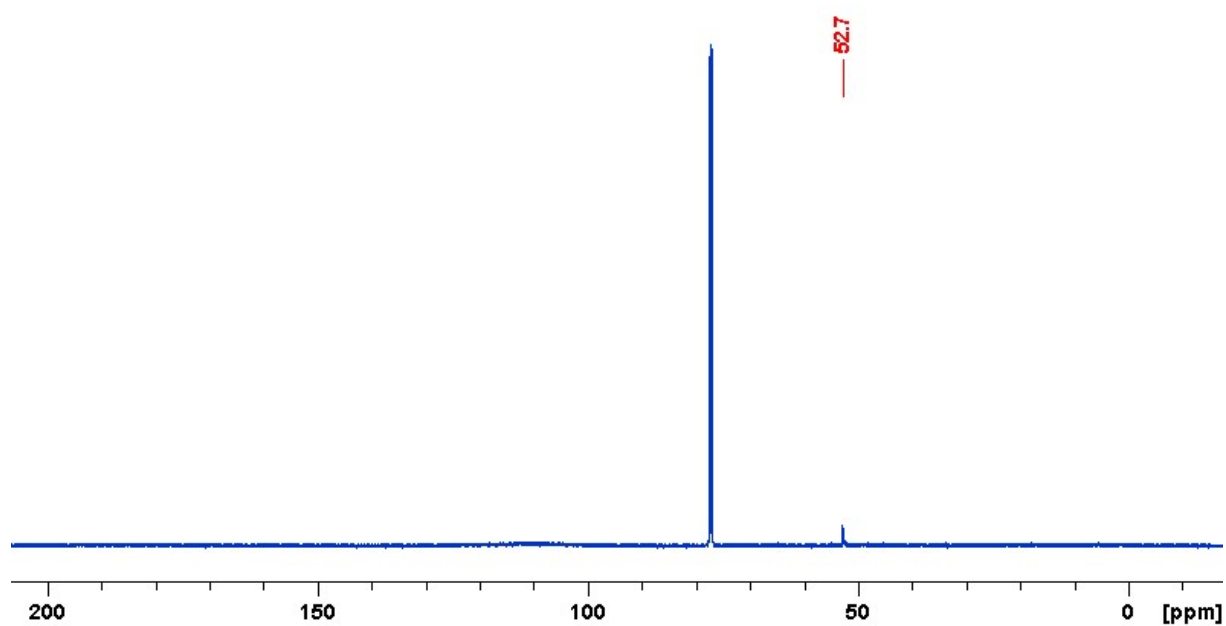

**Figure S16.**  $^{13}\text{C}\{^1\text{H}\}$  NMR spectra of **2** in  $\text{CDCl}_3$

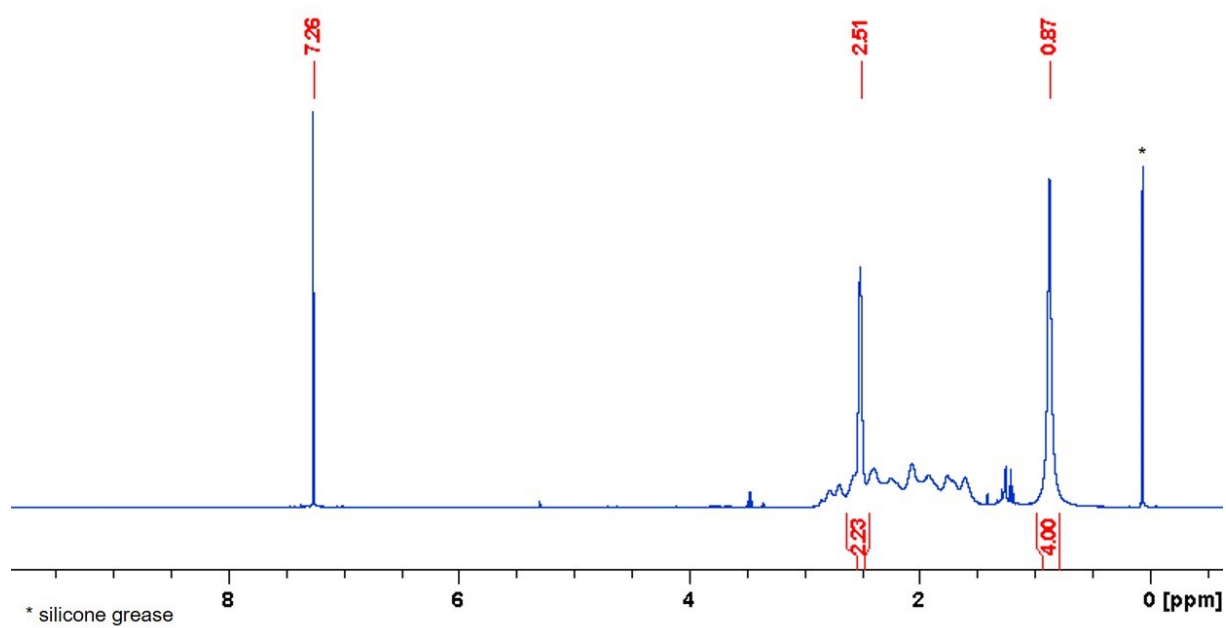

**Figure S17.**  $^1\text{H}$  NMR spectra of **3** in  $\text{CDCl}_3$

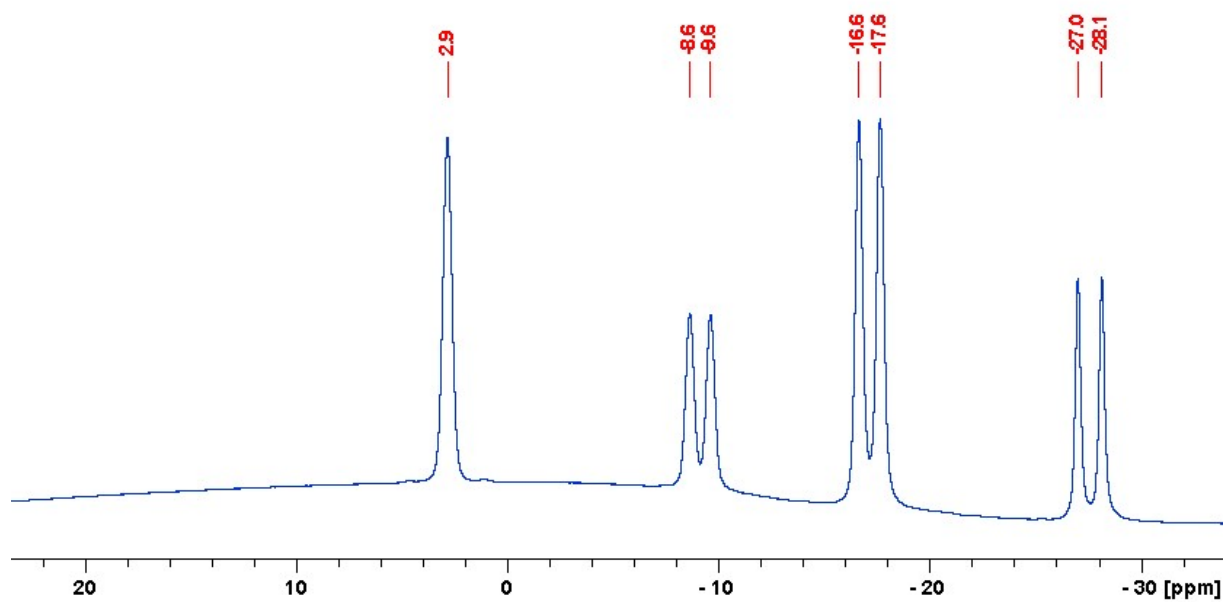

**Figure S18.**  $^{11}\text{B}$  NMR spectra of **3** in  $\text{CDCl}_3$

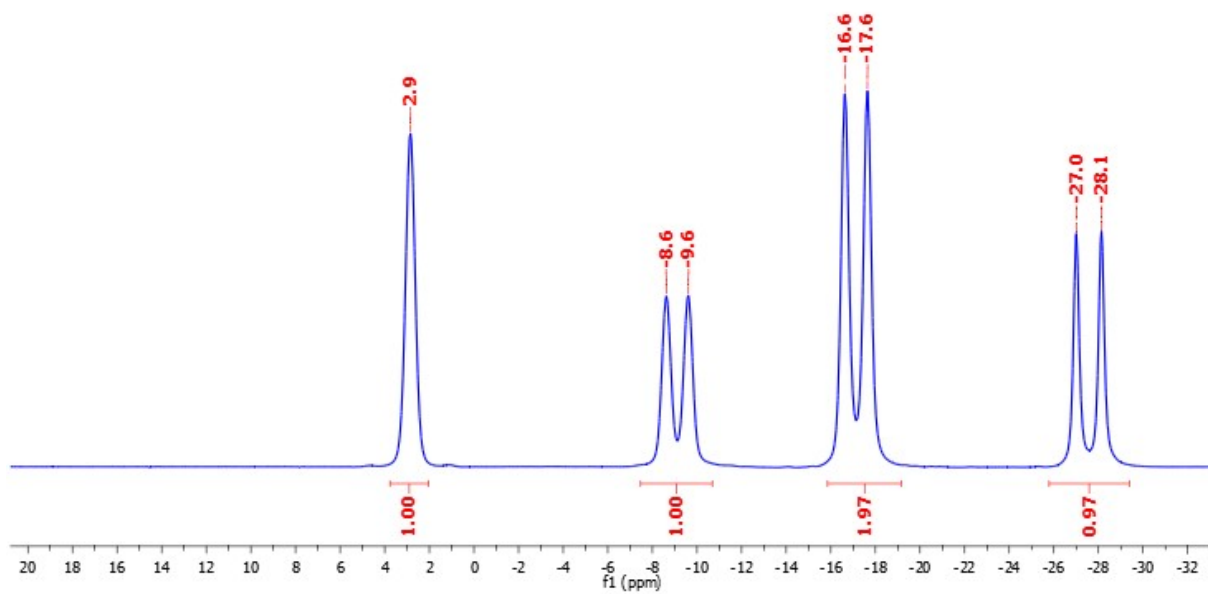

**Figure S19.**  $^{11}\text{B}$  NMR spectra of **3** in  $\text{CDCl}_3$  (MestReNova program was used for the baseline correction)

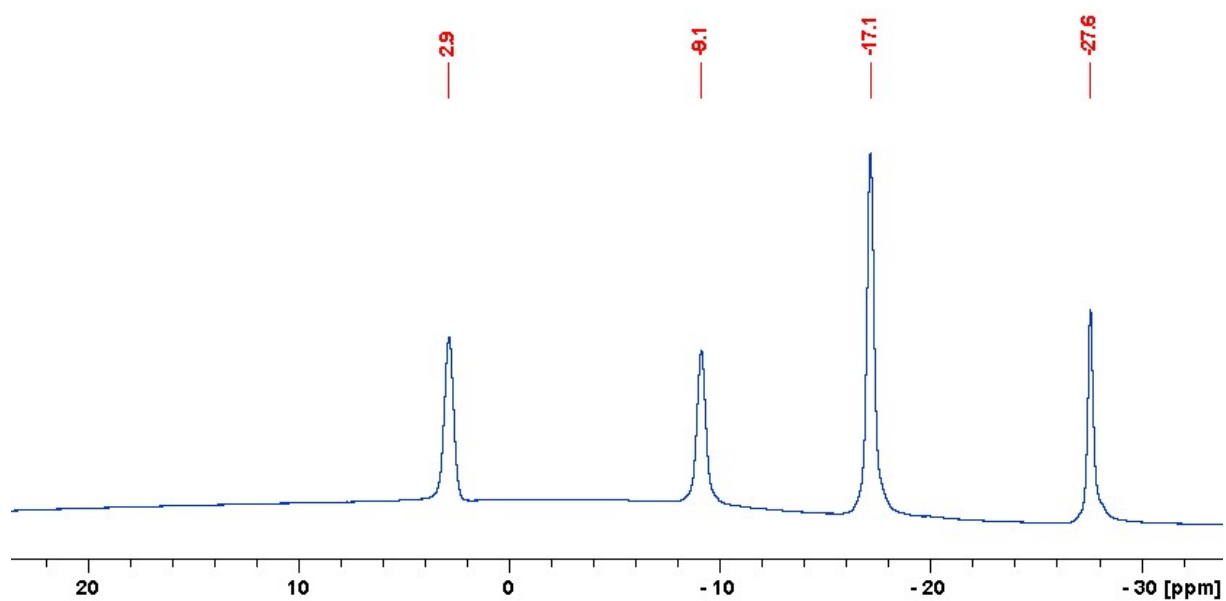

**Figure S20.**  $^{11}\text{B}\{^1\text{H}\}$  NMR spectra of **3** in  $\text{CDCl}_3$

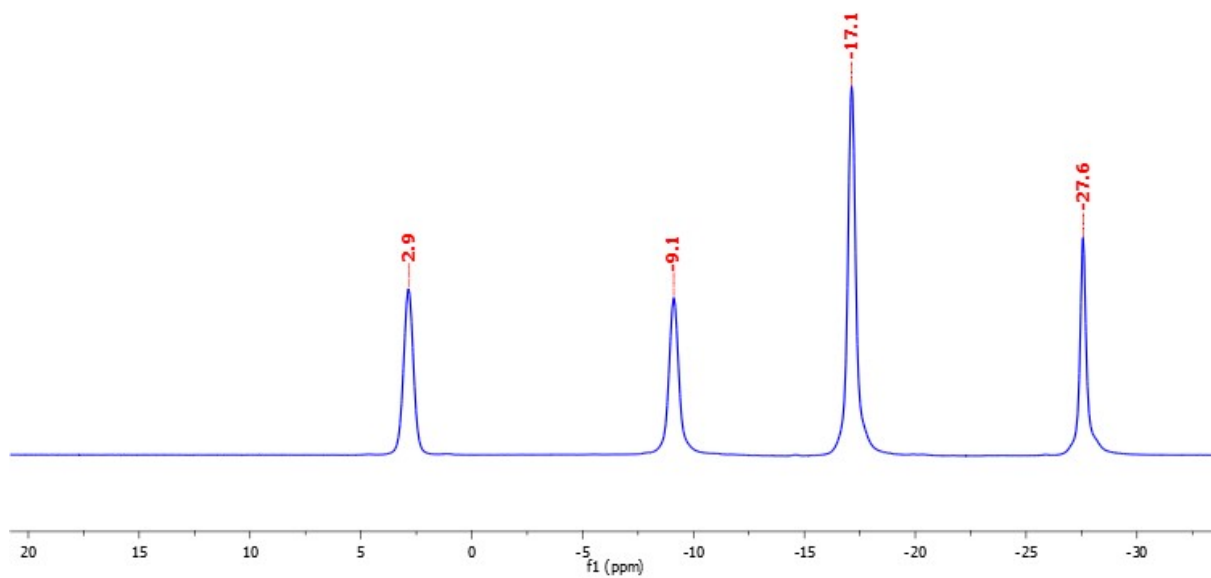

**Figure S21.**  $^{11}\text{B}\{^1\text{H}\}$  NMR spectra of **3** in  $\text{CDCl}_3$  (MestReNova program was used for the baseline correction)

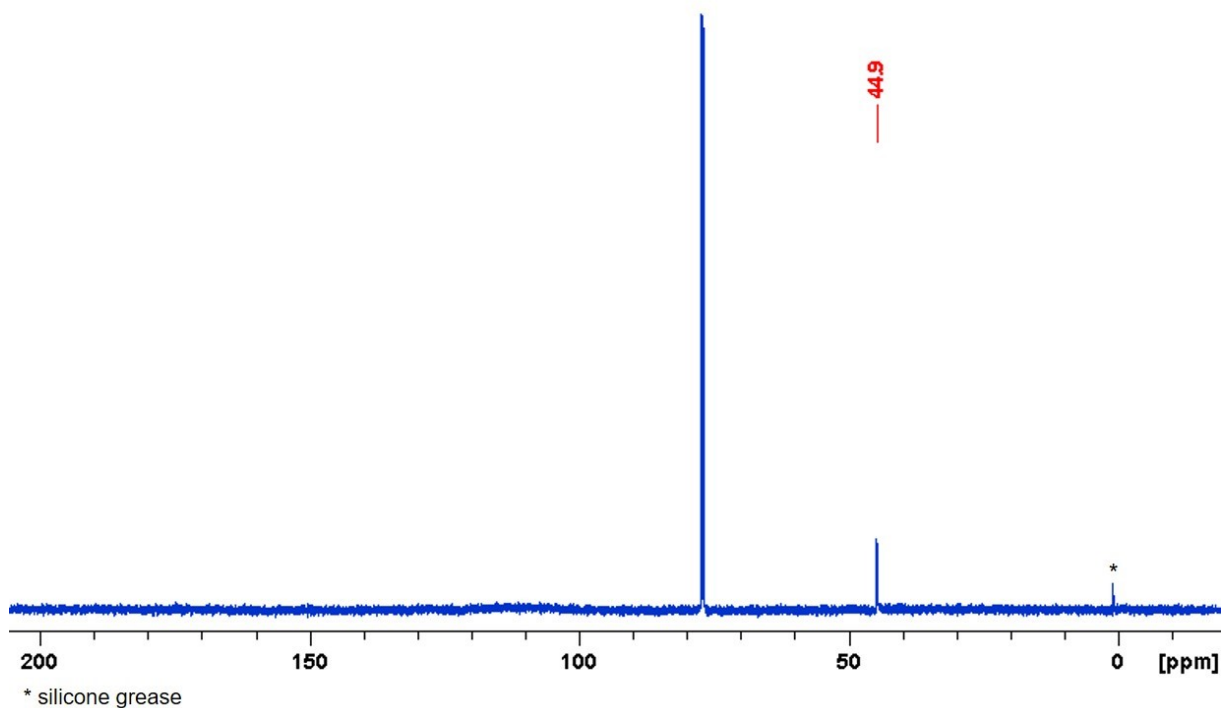

**Figure S22.**  $^{13}\text{C}\{^1\text{H}\}$  NMR spectra of **3** in  $\text{CDCl}_3$



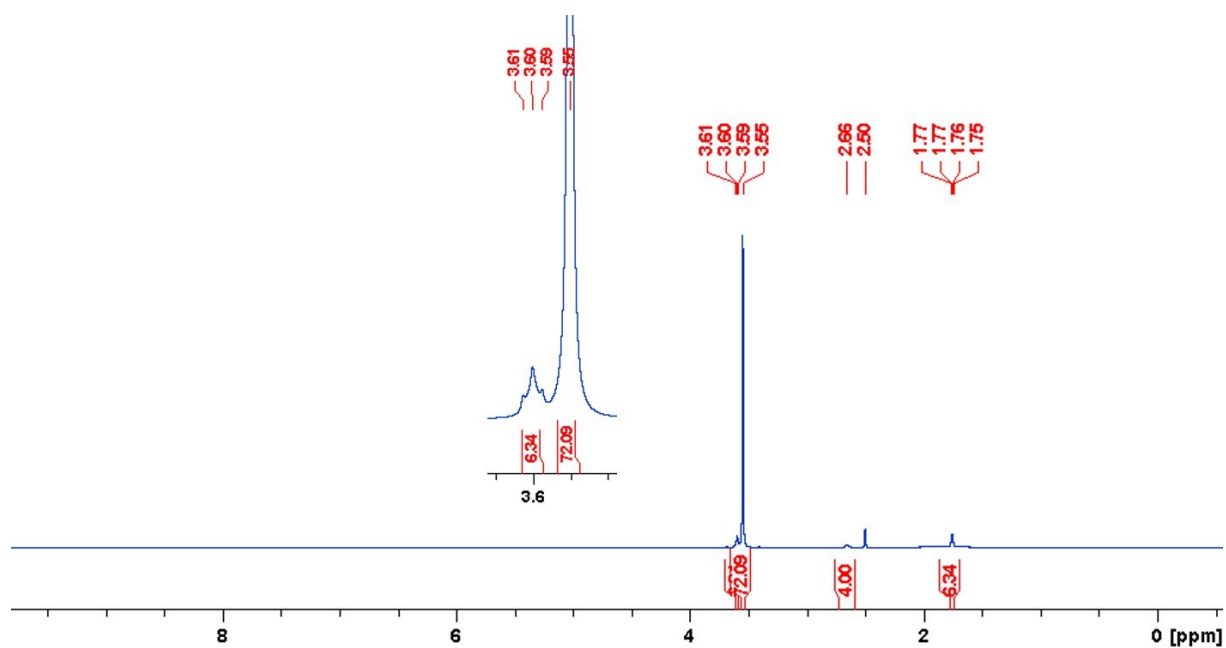

**Figure S23.**  $^1\text{H}$  NMR spectra of **5** in  $\text{DMSO-}d_6$

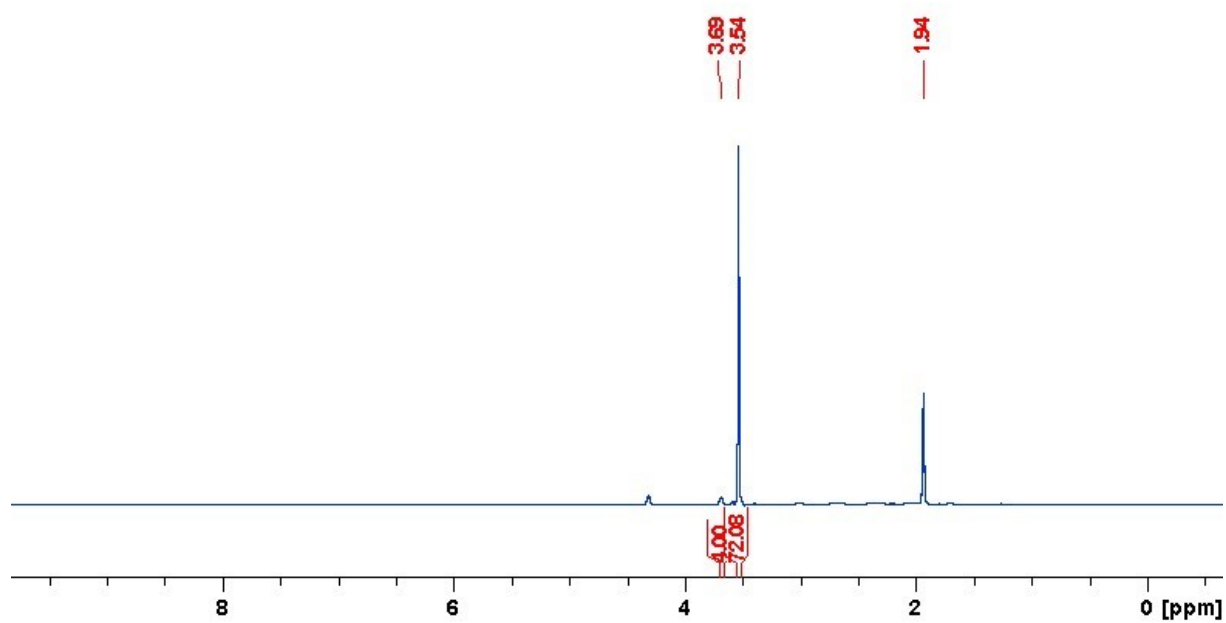

**Figure S24.**  $^1\text{H}$  NMR spectra of **5** in  $\text{CD}_3\text{CN}$

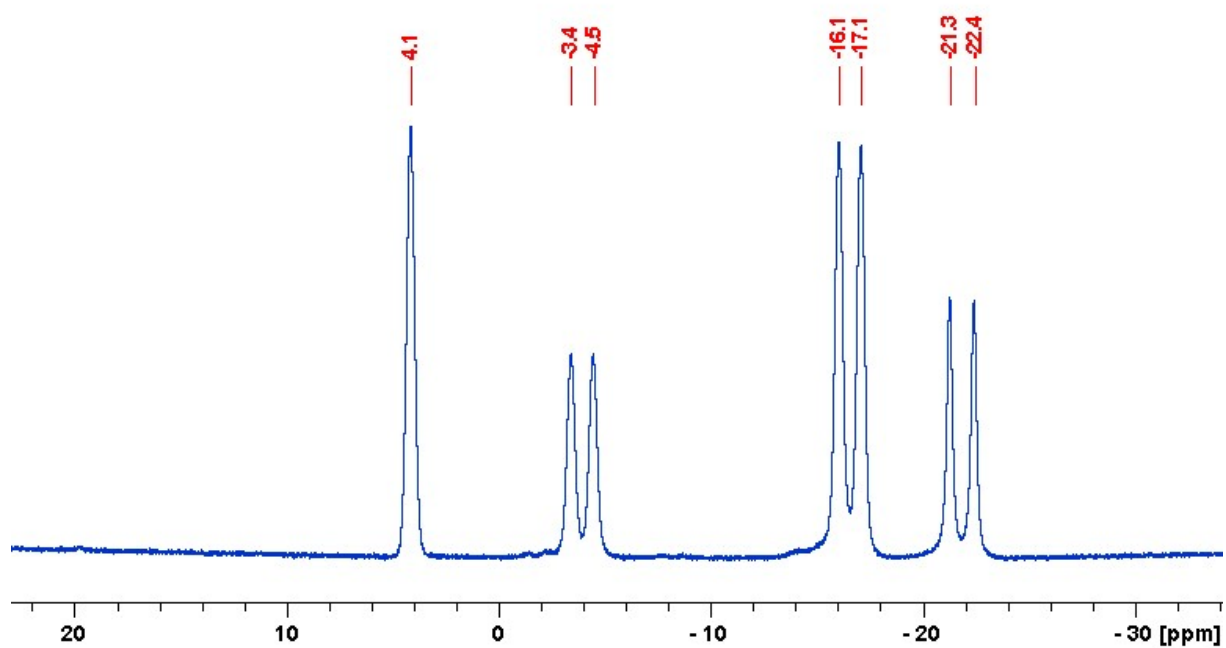

**Figure S25.**  $^{11}\text{B}$  NMR spectra of **5** in  $\text{CD}_3\text{CN}$

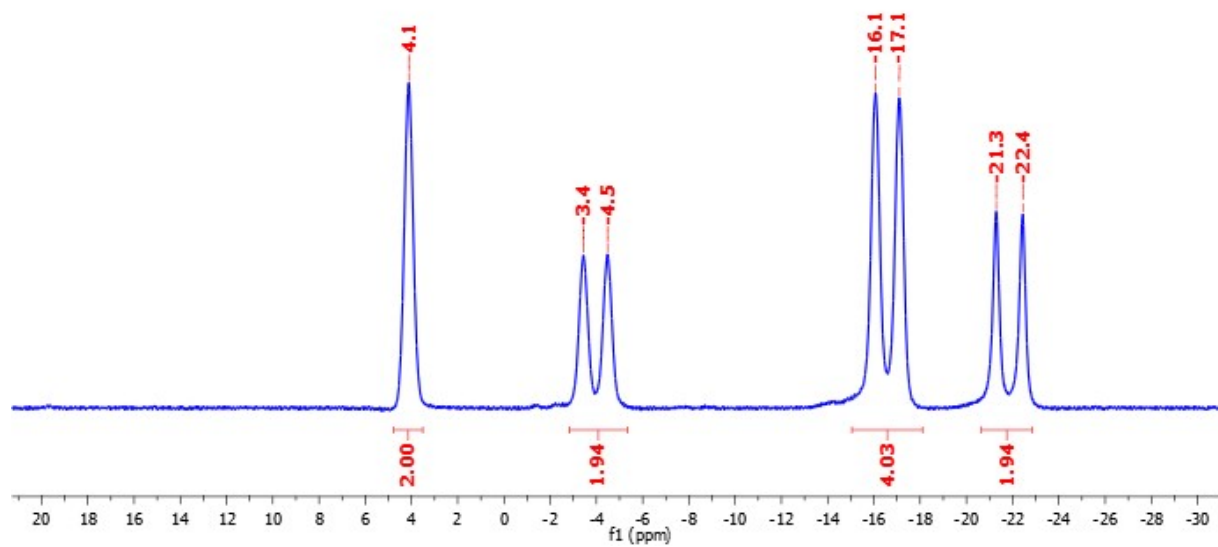

**Figure S26.**  $^{11}\text{B}$  NMR spectra of **5** in  $\text{CD}_3\text{CN}$  (MestReNova program was used for the baseline correction)

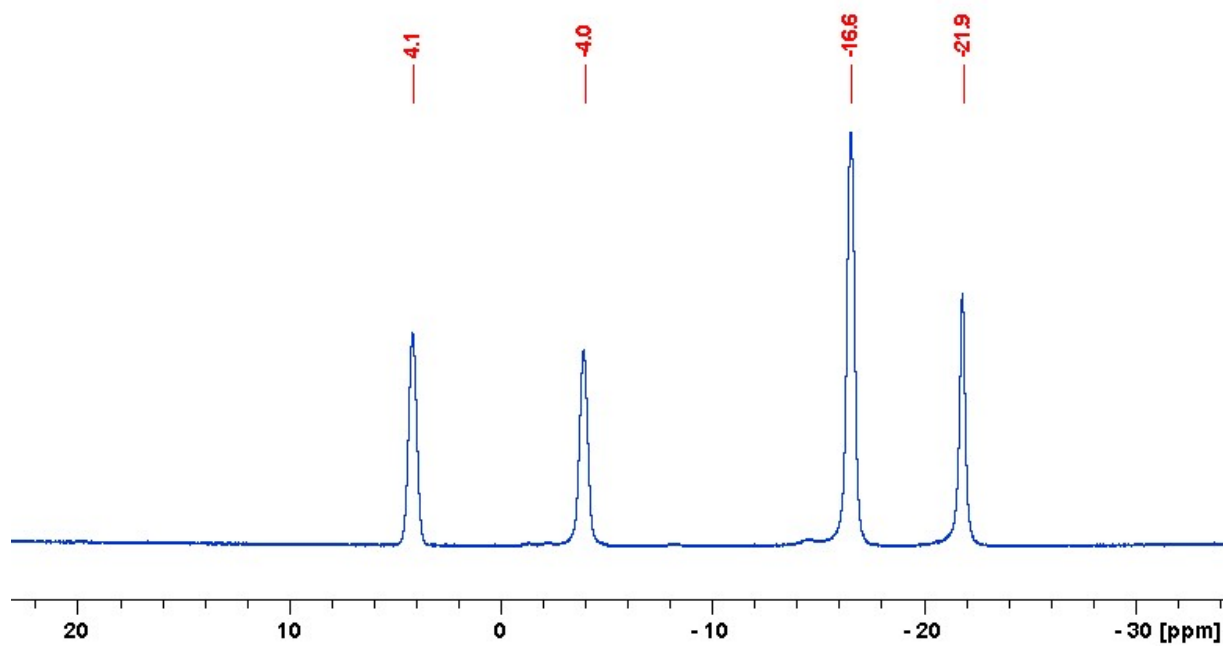

**Figure S27.**  $^{11}\text{B}\{^1\text{H}\}$  NMR spectra of **5** in  $\text{CD}_3\text{CN}$

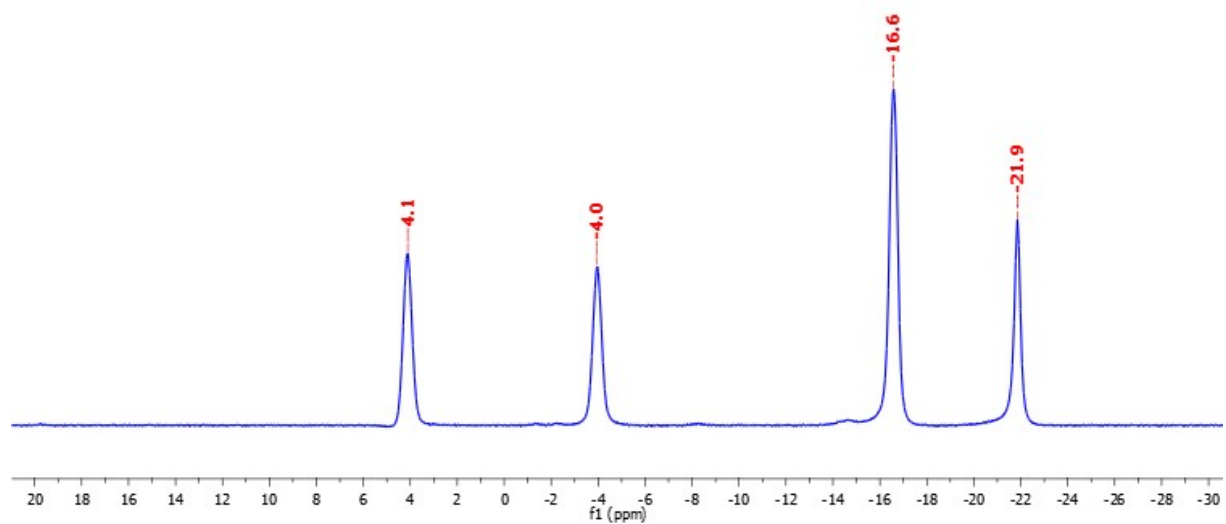

**Figure S28.**  $^{11}\text{B}\{^1\text{H}\}$  NMR spectra of **5** in  $\text{CD}_3\text{CN}$  (MestReNova program was used for the baseline correction)

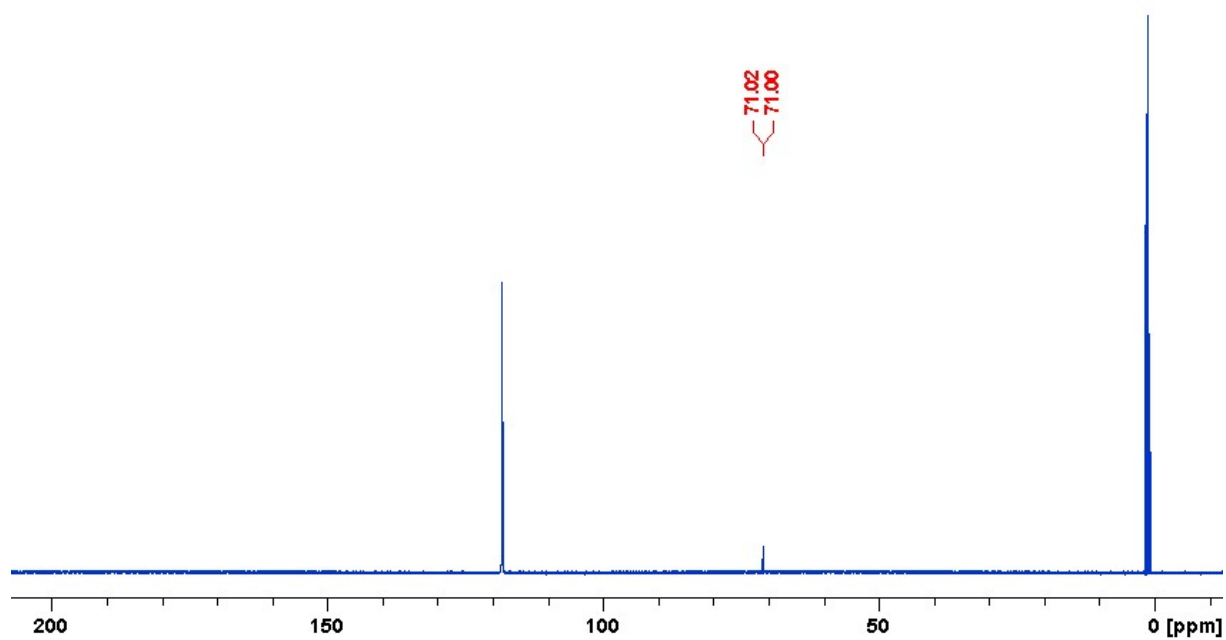

Figure S29.  $^{13}\text{C}\{^1\text{H}\}$  NMR spectra of **5** in  $\text{CD}_3\text{CN}$

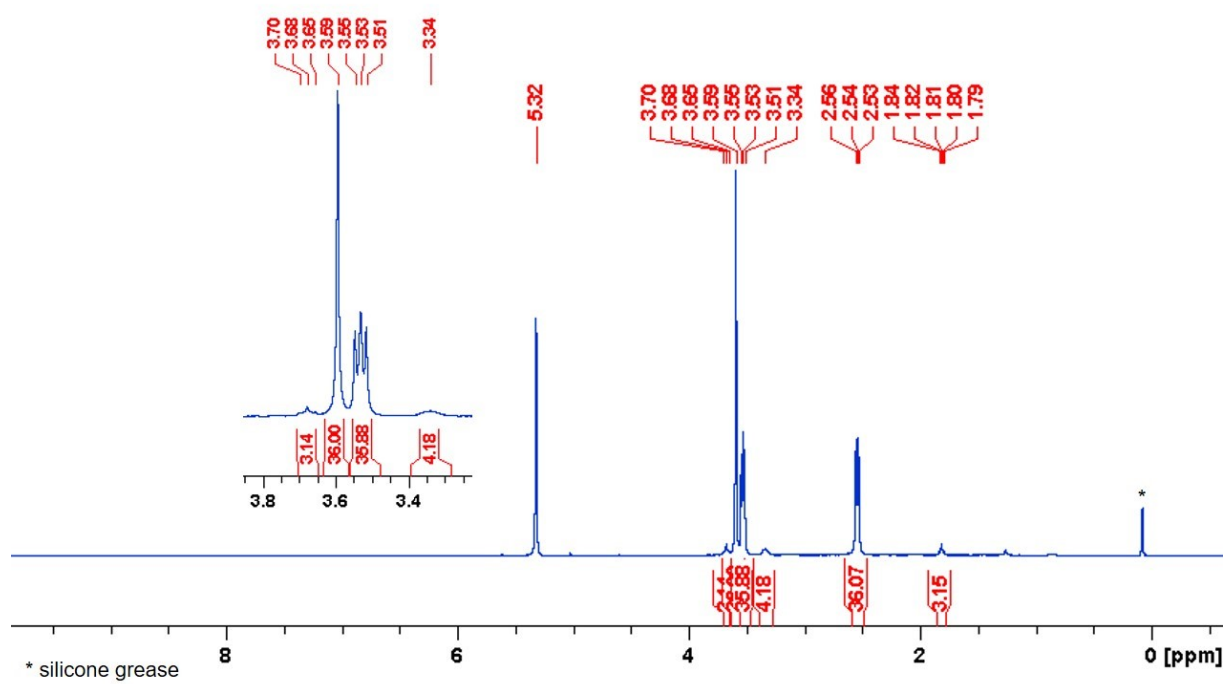

Figure S30.  $^1\text{H}$  NMR spectra of **6** in  $\text{CD}_2\text{Cl}_2$

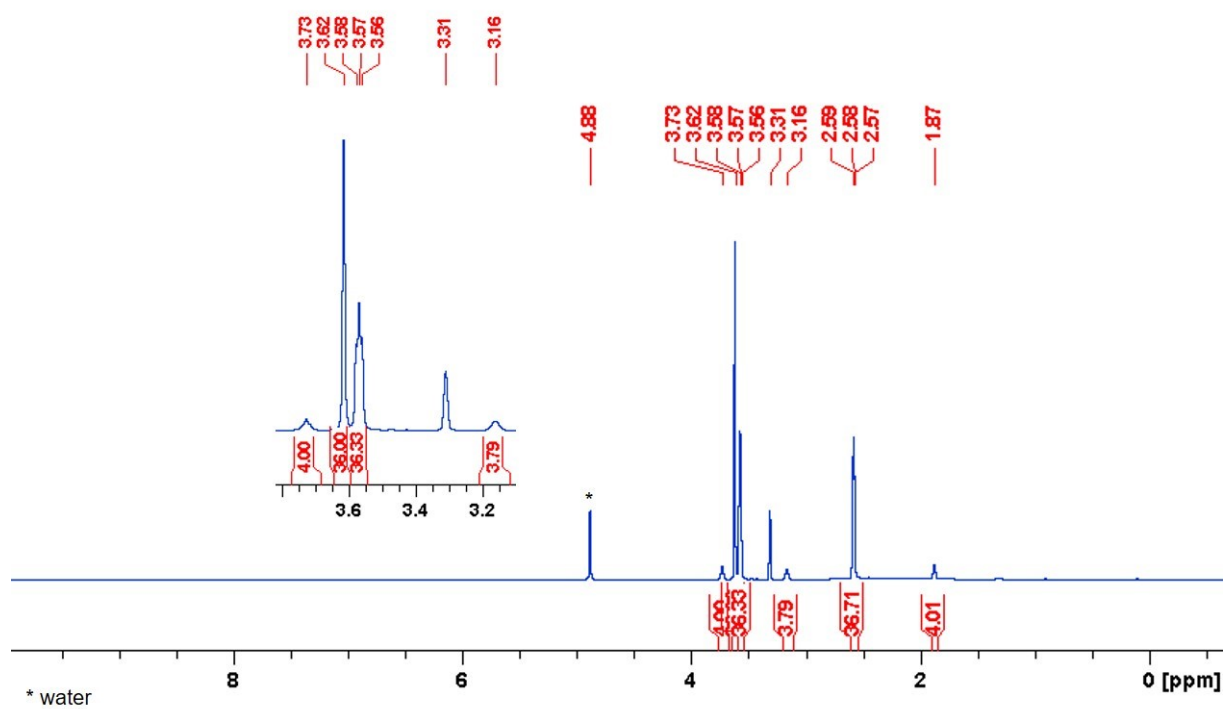

Figure S31.  $^1\text{H}$  NMR spectra of **6** in  $\text{CD}_3\text{OD}$

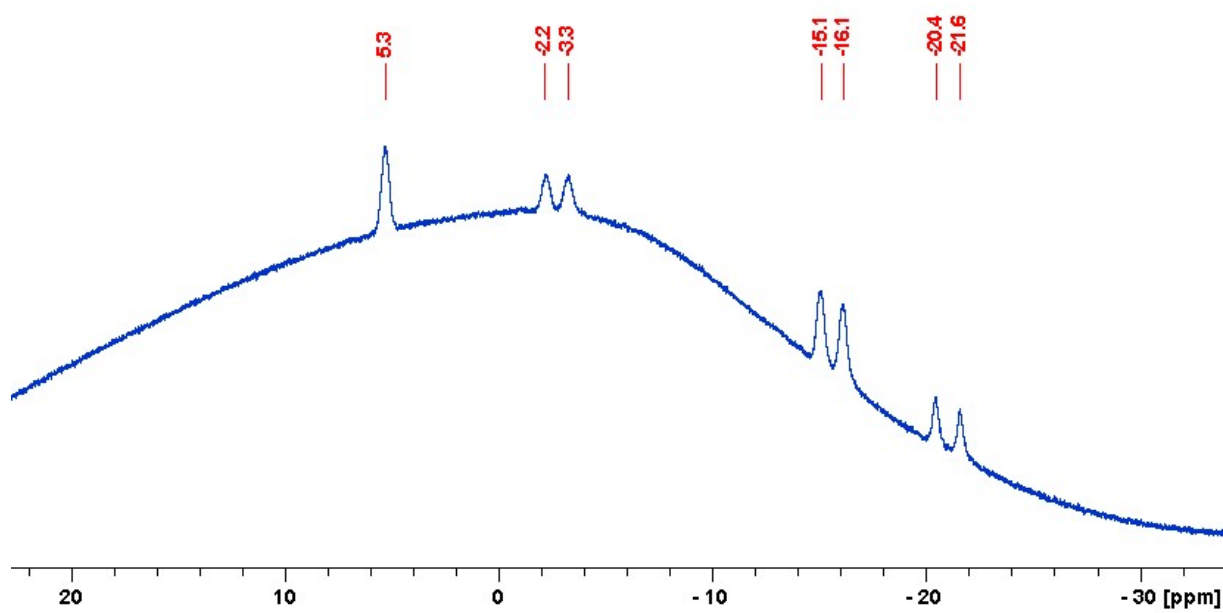

Figure S32.  $^{11}\text{B}$  NMR spectra of **6** in  $\text{CD}_2\text{Cl}_2$

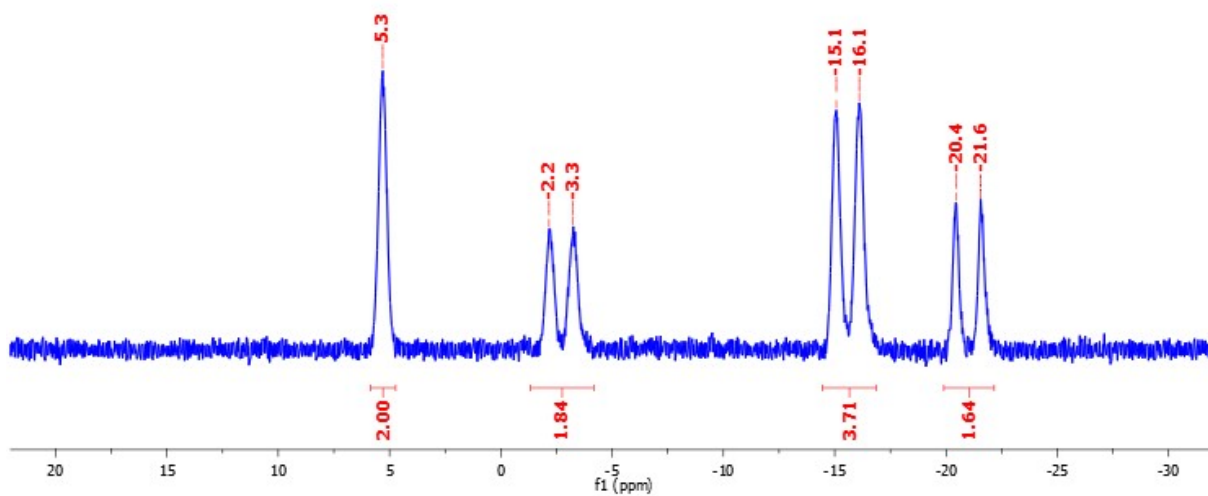

**Figure S33.**  $^{11}\text{B}$  NMR spectra of **6** in  $\text{CD}_2\text{Cl}_2$  (MestReNova program was used for the baseline correction)

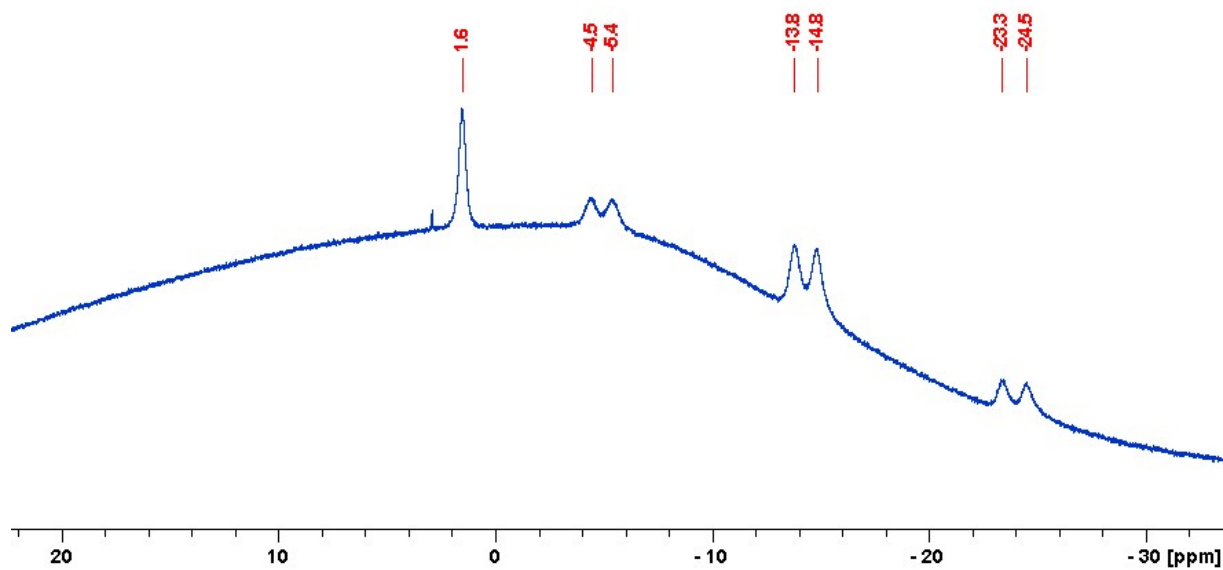

**Figure S34.**  $^{11}\text{B}$  NMR spectra of **6** in  $\text{CD}_3\text{OD}$ . The signal around 2.9 ppm most likely belongs to the  $[\text{BOMe}_4]^-$  anion as a product of the decomposition of the carborane cluster.

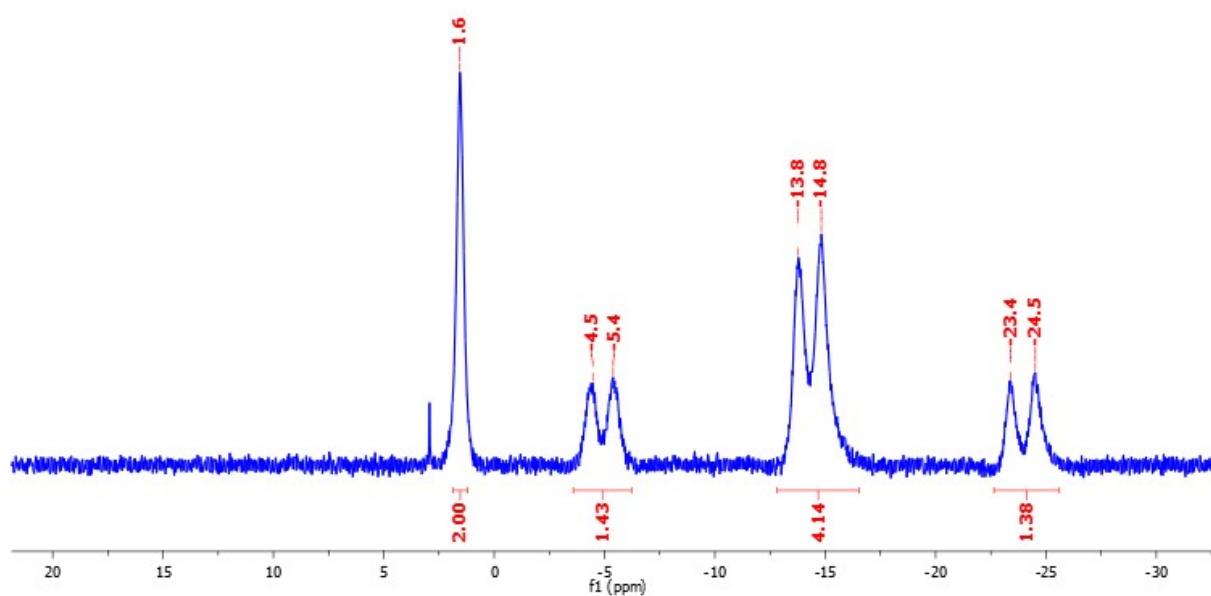

**Figure S35.**  $^{11}\text{B}$  NMR spectra of **6** in  $\text{CD}_3\text{OD}$ . The signal around 2.9 ppm most likely belongs to the  $[\text{BOMe}_4]^-$  anion as a product of the decomposition of the carborane cluster. (MestReNova program was used for the baseline correction)

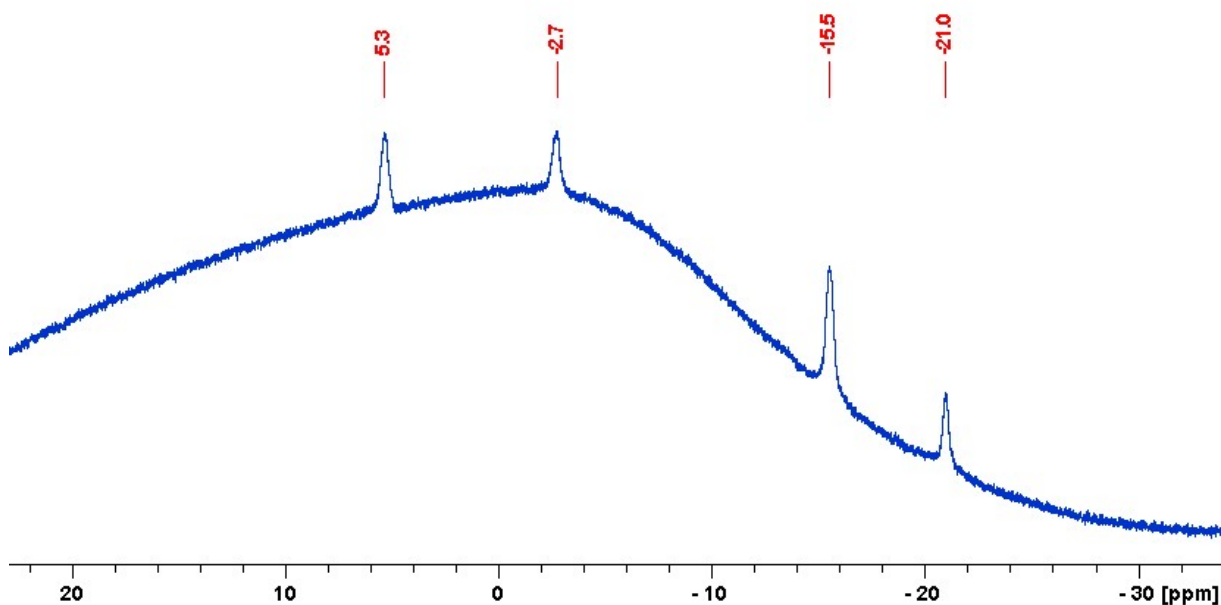

**Figure S36.**  $^{11}\text{B}\{^1\text{H}\}$  NMR spectra of **6** in  $\text{CD}_2\text{Cl}_2$

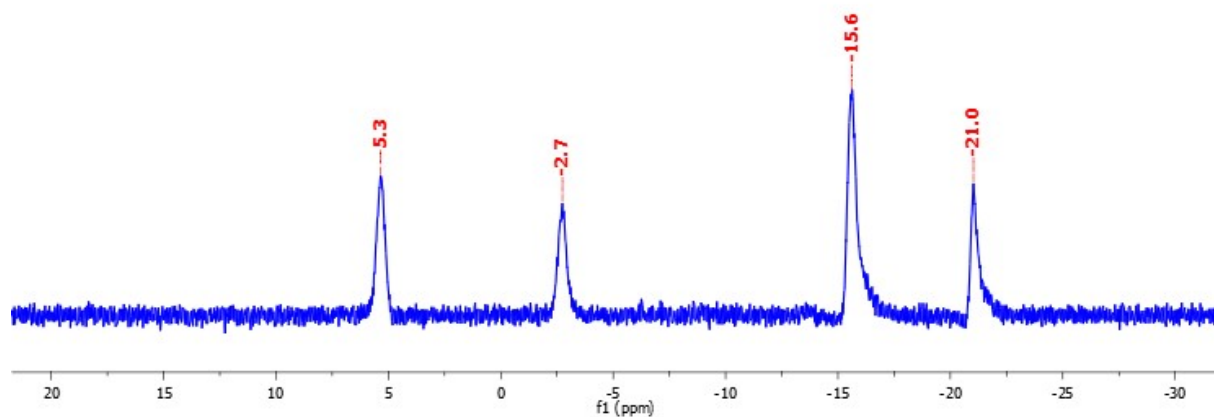

**Figure S37.**  $^{11}\text{B}\{^1\text{H}\}$  NMR spectra of **6** in  $\text{CD}_2\text{Cl}_2$  (MestReNova program was used for the baseline correction)

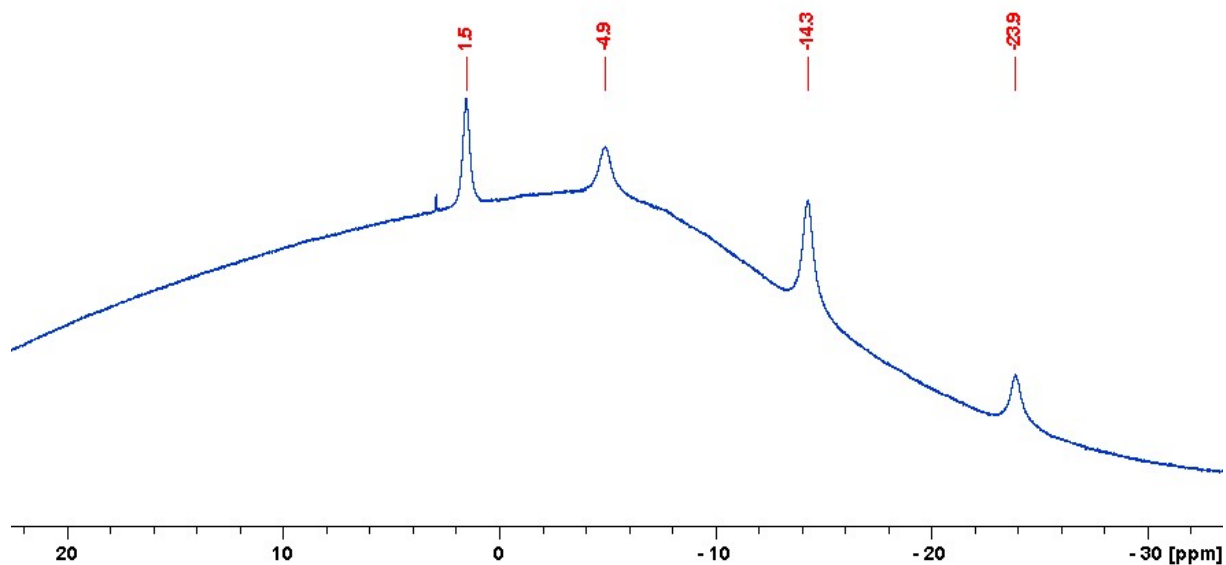

**Figure S38.**  $^{11}\text{B}\{^1\text{H}\}$  NMR spectra of **6** in  $\text{CD}_3\text{OD}$  The signal around 2.9 ppm most likely belongs to the  $[\text{BOMe}_4]^-$  anion as a product of the decomposition of the carborane cluster.



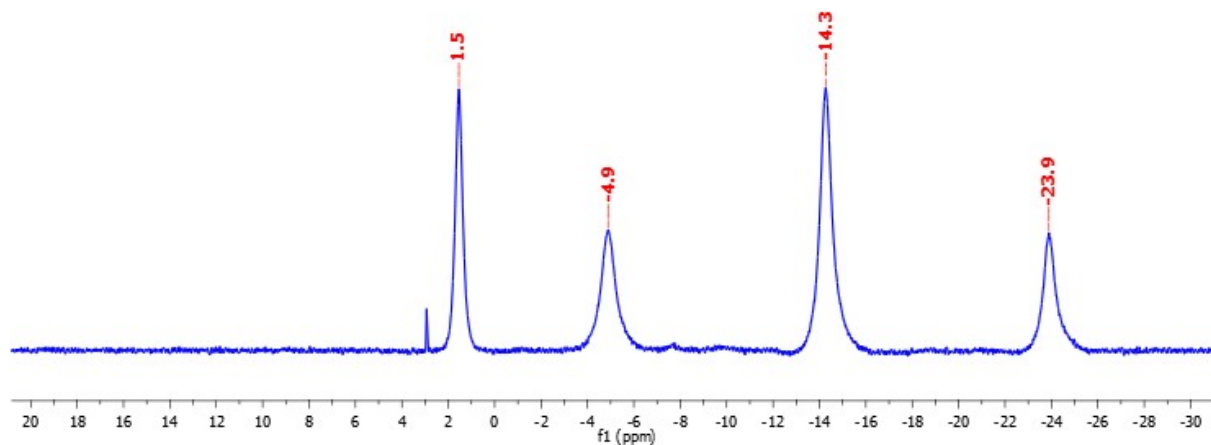

**Figure S39.**  $^{11}\text{B}\{^1\text{H}\}$  NMR spectra of **6** in  $\text{CD}_3\text{OD}$ . The signal around 2.9 ppm most likely belongs to the  $[\text{BOMe}_4]^-$  anion as a product of the decomposition of the carborane cluster. (MestReNova program was used for the baseline correction)

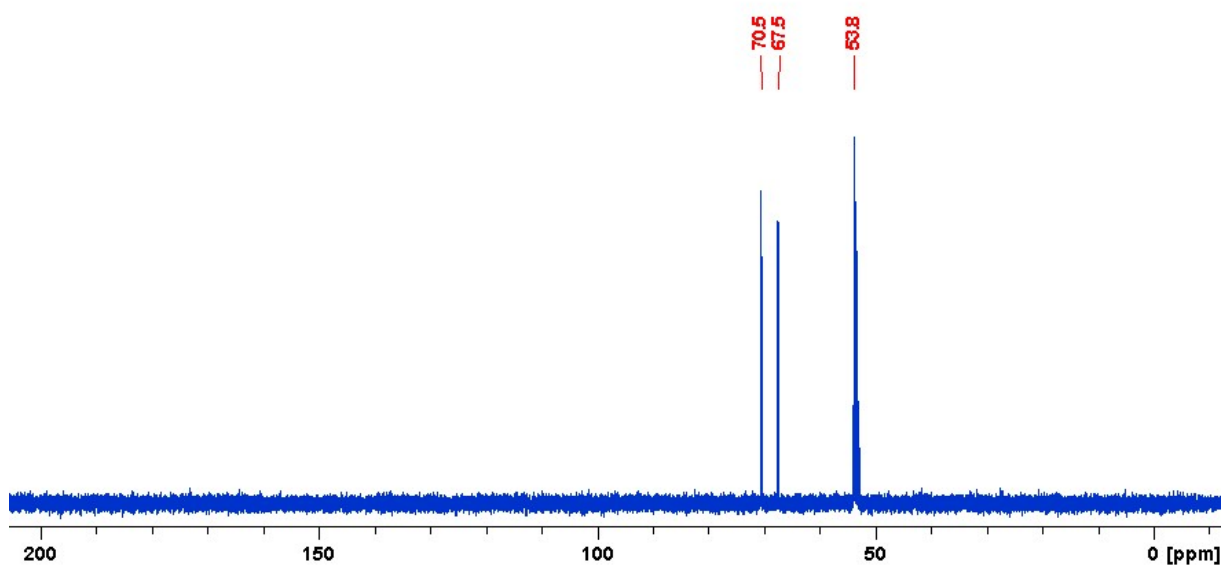

**Figure S40.**  $^{13}\text{C}\{^1\text{H}\}$  NMR spectra of **6** in  $\text{CD}_2\text{Cl}_2$

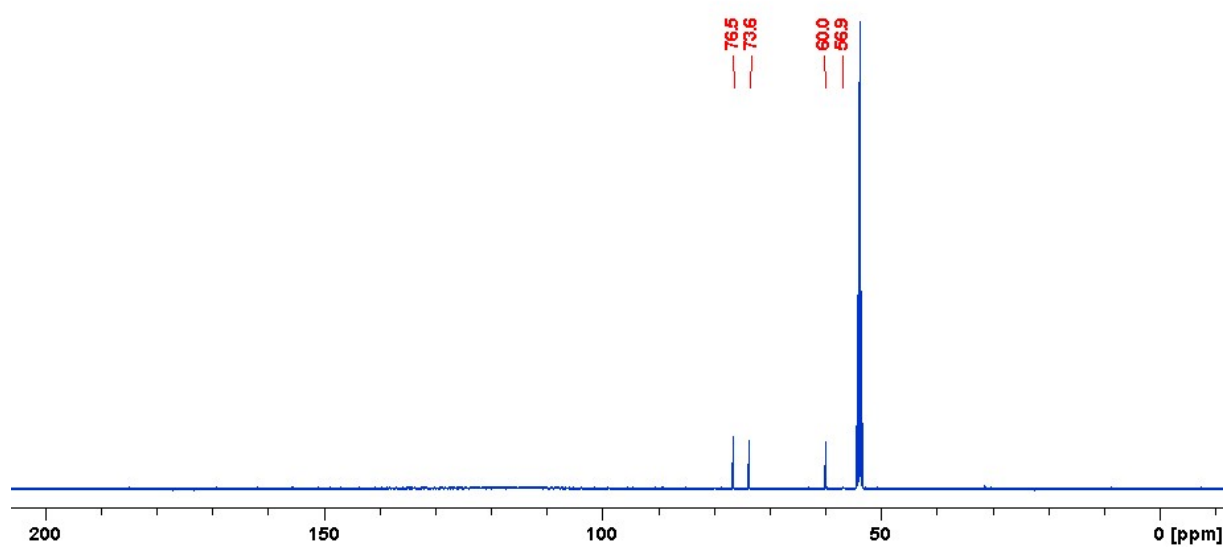

**Figure S41.**  $^{13}\text{C}\{^1\text{H}\}$  NMR spectra of **6** in  $\text{CD}_3\text{OD}$

## IR and UV spectra of compound 4

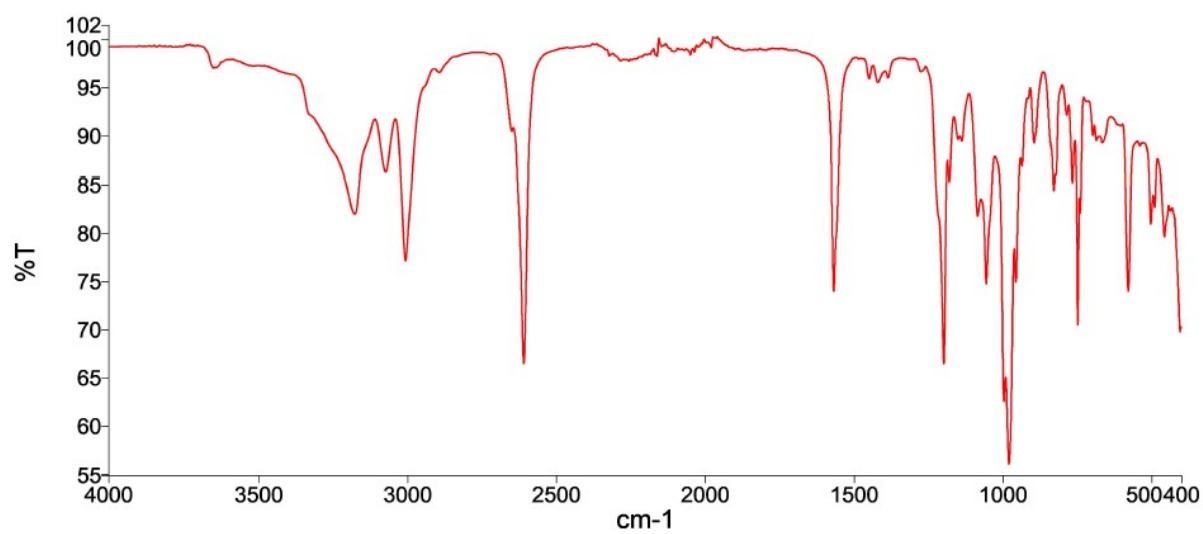

Figure S42. IR spectra of 4

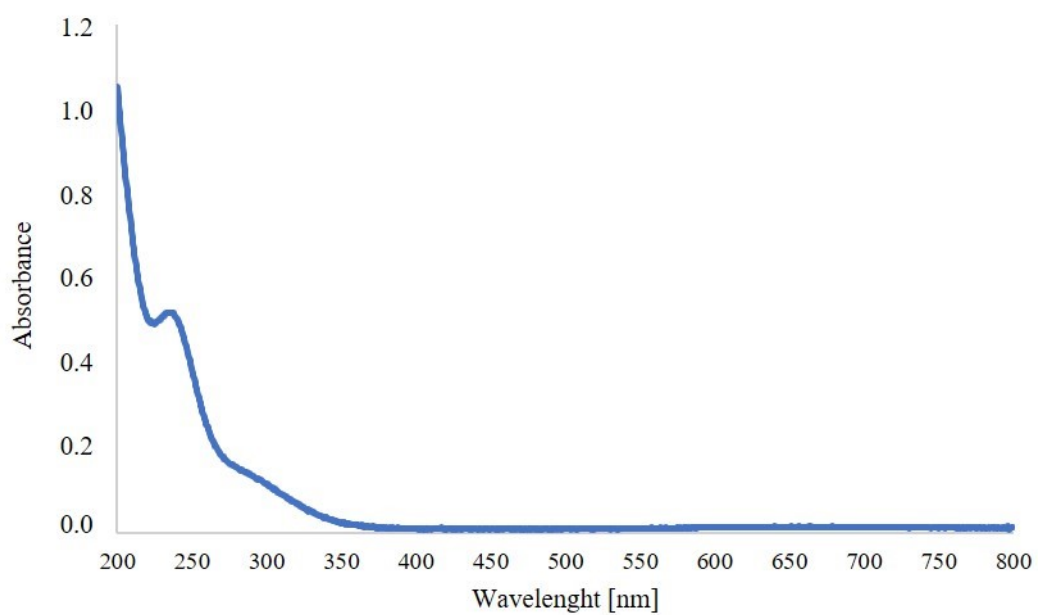

Figure S43. UV-Vis spectra of 4

## Single Crystal X-ray Diffraction (SC-XRD) studies

### Compound 1

*Crystal data:* C<sub>2</sub>H<sub>12</sub>B<sub>10</sub>S<sub>2</sub>, *Fwt.:* 208.34, colourless, block, size: 0.45 x 0.30 x 0.10 mm, monoclinic, space group *P* 2<sub>1</sub>/*n*, *a* = 7.3227(6)Å, *b* = 13.3818(10)Å, *c* = 11.5551(8)Å,  $\alpha = 90^\circ$ ,  $\beta = 90.383(6)^\circ$ ,  $\gamma = 90^\circ$ , *V* = 1132.27(15)Å<sup>3</sup>, *T* = 103(2)K, *Z* = 4, *Z'* = 1, *F*(000) = 424, *D<sub>x</sub>* = 1.222 Mg/m<sup>3</sup>,  $\mu$  0.410mm<sup>-1</sup>.

A crystal of **1** was mounted on a fiber. Cell parameters were determined by least-squares using 39031 ( $3.045 \leq \theta \leq 27.475^\circ$ ) reflections.

Intensity data were collected on a Rigaku RAXIS-RAPID II diffractometer ( monochromator; Mo-*K* $\alpha$  radiation,  $\lambda = 0.71075\text{\AA}$ ) at 103(2) K in the range  $3.045 \leq \theta \leq 25.341$ . A total of 43625 reflections were collected of which 2062 were unique [*R*(int) = 0.1445, *R*( $\sigma$ ) = 0.0434]; intensities of 1982 reflections were greater than 2 $\sigma$ (*I*). Completeness to  $\theta = 0.998$ .

A numerical absorption correction was applied to the data (the minimum and maximum transmission factors were 0.987689 and 0.997209).

The structure was solved by direct methods (and subsequent difference syntheses).

Anisotropic full-matrix least-squares refinement on *F*<sup>2</sup> for all non-hydrogen atoms yielded *R*<sub>1</sub> = 0.0525 and *wR*<sup>2</sup> = 0.1190 for 1332 [*I* > 2 $\sigma$ (*I*)] and *R*<sub>1</sub> = 0.0562 and *wR*<sup>2</sup> = 0.1212 for all ( 2062) intensity data, (number of parameters = 128, goodness-of-fit = 1.179, the maximum and mean shift/esd is 0.001 and 0.000).

The maximum and minimum residual electron density in the final difference map was 0.28 and -0.28e.Å<sup>-3</sup>.

The weighting scheme applied was  $w = 1/[\sigma^2(F_o^2) + (0.05260.7198P)^2 + 0.7198P]$  where  $P = (F_o^2 + 2F_c^2)/3$ .

Hydrogen atomic positions were calculated from assumed geometries. Hydrogen atoms were included in structure factor calculations but they were not refined. The isotropic displacement parameters of the hydrogen atoms were approximated from the *U*(eq) value of the atom they were bonded to.

## Compound 2

*Crystal data:* C<sub>2</sub>H<sub>12</sub>B<sub>10</sub>S<sub>2</sub>, *Fwt.:* 208.34, colourless, block, size: 0.30 x 0.20 x 0.15 mm, monoclinic, space group *C* 2/*c*, *a* = 10.8421(18)Å, *b* = 8.7020(13)Å, *c* = 12.067(2)Å,  $\alpha = 90^\circ$ ,  $\beta = 105.688(7)^\circ$ ,  $\gamma = 90^\circ$ , *V* = 1096.1(3)Å<sup>3</sup>, *T* = 103(2)K, *Z* = 4, *Z'* = 1, *F*(000) = 424, *D<sub>x</sub>* = 1.262 Mg/m<sup>3</sup>,  $\mu$  0.424mm<sup>-1</sup>.

A crystal of **2** was mounted on a fiber. Cell parameters were determined by least-squares using 10595 ( $3.05 \leq \theta \leq 27.46^\circ$ ) reflections.

Intensity data were collected on a(n) Rigaku RAXIS-RAPID II diffractometer (monochromator; Mo-*K*α radiation,  $\lambda = 0.71075\text{Å}$ ) at 103(2) K in the range  $3.048 \leq \theta \leq 25.345$ . A total of 11065 reflections were collected of which 1009 were unique [*R*(int) = 0.0615, *R*( $\sigma$ ) = 0.0288]; intensities of 941 reflections were greater than 2 $\sigma$ (*I*). Completeness to  $\theta = 0.996$ .

A numerical absorption correction was applied to the data (the minimum and maximum transmission factors were 0.958962 and 0.980800).

The structure was solved by direct methods (and subsequent difference syntheses).

Anisotropic full-matrix least-squares refinement on *F*<sup>2</sup> for all non-hydrogen atoms yielded *R*<sub>1</sub> = 0.0565 and *wR*<sup>2</sup> = 0.1317 for 1332 [*I* > 2 $\sigma$ (*I*)] and *R*<sub>1</sub> = 0.0621 and *wR*<sup>2</sup> = 0.1347 for all (1009) intensity data, (number of parameters = 66, goodness-of-fit = 1.220, the maximum and mean shift/esd is 0.001 and 0.000).

The maximum and minimum residual electron density in the final difference map was 0.34 and -0.27e.Å<sup>-3</sup>.

The weighting scheme applied was  $w = 1/[\sigma^2(F_o^2) + (0.05951.5983P)^2 + 1.5983P]$  where  $P = (F_o^2 + 2F_c^2)/3$ .

Hydrogen atomic positions were calculated from assumed geometries. Hydrogen atoms were included in structure factor calculations but they were not refined. The isotropic displacement parameters of the hydrogen atoms were approximated from the *U*(eq) value of the atom they were bonded to.

### Compound 3

*Crystal data:* C<sub>2</sub>H<sub>14</sub>B<sub>10</sub>N<sub>2</sub>, *Fwt.:* 174.25, colourless, block, size: 0.50 x 0.48 x 0.15 mm, monoclinic, space group *C* 2/*c*, *a* = 24.7966(6)Å, *b* = 6.9932(2)Å, *c* = 11.6138(3)Å,  $\alpha = 90^\circ$ ,  $\beta = 98.493(7)^\circ$ ,  $\gamma = 90^\circ$ , *V* = 1991.84(10)Å<sup>3</sup>, *T* = 103(2)K, *Z* = 8, *Z'* = 1, *F*(000) = 720, *D<sub>x</sub>* = 1.162 Mg/m<sup>3</sup>,  $\mu$  0.382mm<sup>-1</sup>.

A crystal of **3** was mounted on a fiber. Cell parameters were determined by least-squares using 34070 ( $3.605 \leq \theta \leq 71.98^\circ$ ) reflections.

Intensity data were collected on a(n) Rigaku RAXIS-RAPID II diffractometer (monochromator; Cu-*K*α radiation,  $\lambda = 1.54187\text{Å}$ ) at 103(2) K in the range  $3.605 \leq \theta \leq 68.248$ . A total of 37471 reflections were collected of which 1828 were unique [*R*(int) = 0.0453, *R*( $\sigma$ ) = 0.0169]; intensities of 1732 reflections were greater than 2 $\sigma$ (*I*). Completeness to  $\theta = 0.999$ .

A numerical absorption correction was applied to the data (the minimum and maximum transmission factors were 0.977126 and 0.991424).

The structure was solved by direct methods (and subsequent difference syntheses).

Anisotropic full-matrix least-squares refinement on *F*<sup>2</sup> for all non-hydrogen atoms yielded *R*<sub>1</sub> = 0.0509 and *wR*<sup>2</sup> = 0.1305 for 1332 [*I* > 2 $\sigma$ (*I*)] and *R*<sub>1</sub> = 0.0533 and *wR*<sup>2</sup> = 0.1323 for all (1828) intensity data, (number of parameters = 128, goodness-of-fit = 1.131, the maximum and mean shift/esd is 0.001 and 0.000).

The maximum and minimum residual electron density in the final difference map was 0.22 and -0.26e.Å<sup>-3</sup>.

The weighting scheme applied was  $w = 1/[\sigma^2(F_o^2) + (0.05811.9150P)^2 + 1.9150P]$  where  $P = (F_o^2 + 2F_c^2)/3$ .

Hydrogen atomic positions were calculated from assumed geometries. Hydrogen atoms were included in structure factor calculations but they were not refined. The isotropic displacement parameters of the hydrogen atoms were approximated from the *U*(eq) value of the atom they were bonded to.

#### Compound 4

*Crystal data:* C<sub>4</sub>H<sub>30</sub>B<sub>20</sub>Cl<sub>2</sub>CuN<sub>4</sub>O<sub>2</sub>, *Fwt.:* 516.96, blue, block, size: 0.21×0.12×0.10 mm, monoclinic, space group *C 2/m*, *a* = 15.9986(11) Å, *b* = 12.1898(10) Å, *c* = 6.7272(5) Å,  $\alpha = 90^\circ$ ,  $\beta = 105.470(3)^\circ$ ,  $\gamma = 90^\circ$ , *V* = 1264.41(17) Å<sup>3</sup>, *T* = 296(2)K, *Z* = 2, *Z'* = 0.25, *F*(000) = 522, *D<sub>x</sub>* = 1.358 Mg/m<sup>3</sup>,  $\mu$  1.088 mm<sup>-1</sup>.

A blue block-shaped crystal (**4**) with dimensions 0.21 × 0.12 × 0.10 mm was mounted on a Mitegen Loop. Intensity data were collected using a Bruker Venture D8 APEX-II CCD diffractometer operating at *T* = 296(2) K ( monochromator; Mo-*K*α radiation,  $\lambda = 0.71073$  Å) in the range  $3.142 \leq \theta \leq 25.741$

The unit cell was refined using Bruker SAINT on 4621 reflections, 53% of the observed reflections.

A total of 8764 reflections were collected of which 1257 were unique [*R*(<sub>int</sub>) = 0.0535, *R*( $\sigma$ ) = 0.0308]; intensities of 1183 reflections were greater than 2 $\sigma$ (*I*). Completeness to  $\theta = 0.989$ .

Multi-scan absorption correction was applied to the data, the Ratio of minimum to maximum transmission is 0.9121.

The structure was solved and the space group *C2/m* (# 12) determined by the ShelXT (Sheldrick, 2015) structure solution program using using geom methods and refined by full matrix least squares minimisation on *F*<sup>2</sup> using version 2018/3 of ShelXL (Sheldrick, 2015), managed by Olex2 1.5 (Dolomanov et al., 2009) as the graphical interface. All non-hydrogen atoms were refined anisotropically. Hydrogen atom positions were calculated geometrically and refined using the riding model. Most hydrogen atom positions were calculated geometrically and refined using the riding model, but some hydrogen atoms were refined freely.

## Compound 5

*Crystal data:*  $C_{60}H_{132}B_{20}K_4O_{23}S_4$ , *Fwt.:* 1721.58, colorless, plate, size: 0.260 x 0.157 x 0.090 mm, monoclinic, space group  $C 1 c 1$ ,  $a = 18.4531(6)\text{\AA}$ ,  $b = 25.6027(7)\text{\AA}$ ,  $c = 19.2303(6)\text{\AA}$ ,  $\alpha = 90^\circ$ ,  $\beta = 94.515(3)^\circ$ ,  $\gamma = 90^\circ$ ,  $V = 9057.1(5)\text{\AA}^3$ ,  $T = 100.15\text{K}$ ,  $Z = 4$ ,  $F(000) = 3660$ ,  $D_x = 1.263\text{Mg/m}^3$ ,  $\mu = 3.126\text{mm}^{-1}$ .

A crystal of **5** was mounted on a glass fiber. Cell parameters were determined by least-squares using 43890 ( $2.96 \leq \theta \leq 70.76^\circ$ ) reflections.

Intensity data were collected on a STOE STADIVARI diffractometer (Graded multilayer mirror monochromator; Cu- $K\alpha$  radiation,  $\lambda = 1.54186\text{\AA}$ ) at 100(2) K in the range  $2.958 \leq \theta \leq 70.204$ . A total of 31158 reflections were collected of which 31158 were unique [ $R(\text{int}) = 0.0371$ ,  $R(\sigma) = 0.0529$ ]; intensities of 22714 reflections were greater than  $2\sigma(I)$ . Completeness to  $\theta = 0.966$ . A(n) multi-scan absorption correction was applied to the data (the minimum and maximum transmission factors were 0.4455 and 0.7559).

The structure was solved by direct methods (and subsequent difference syntheses).

Anisotropic full-matrix least-squares refinement on  $F^2$  for all non-hydrogen atoms yielded  $R_1 = 0.0472$  and  $wR^2 = 0.1090$  for 1332 [ $I > 2\sigma(I)$ ] and  $R_1 = 0.0763$  and  $wR^2 = 0.1218$  for all (31158) intensity data, (number of parameters = 1023, goodness-of-fit = 1.015, the maximum and mean shift/esd is 0.152 and 0.008). The absolute structure parameter is 0.03(4). (Friedel coverage: 0.998, Friedel fraction max.: 0.966, Friedel fraction full: 0.987).

The maximum and minimum residual electron density in the final difference map was 0.48 and  $-0.34\text{e}\cdot\text{\AA}^{-3}$ .

The weighting scheme applied was  $w = 1/[\sigma^2(F_o^2) + (0.0685P)^2 + 0P]$  where  $P = (F_o^2 + 2F_c^2)/3$ .

Hydrogen atomic positions were calculated from assumed geometries. Hydrogen atoms were included in structure factor calculations but they were not refined. The isotropic displacement parameters of the hydrogen atoms were approximated from the  $U(\text{eq})$  value of the atom they were bonded to.



## Compound 5'

*Crystal data:* C<sub>40</sub>H<sub>94</sub>B<sub>20</sub>K<sub>4</sub>O<sub>19</sub>S<sub>4</sub>, 4(CH<sub>3</sub>CN), *Fwt.:* 1523.67, colourless, prism, size: 0.17 x 0.13 x 0.08 mm, monoclinic, space group *P* 1 21/n 1, *a* = 16.1368(6)Å, *b* = 25.8487(14)Å, *c* = 18.8254(8)Å,  $\alpha = 90^\circ$ ,  $\beta = 90.405(3)^\circ$ ,  $\gamma = 90^\circ$ , *V* = 7852.2(6)Å<sup>3</sup>, *T* = 100.15K, *Z* = 4, *Z'* = 1, *F*(000) = 3212, *D<sub>x</sub>* = 1.289 Mg/m<sup>3</sup>,  $\mu$  0.395mm<sup>-1</sup>.

A crystal of 5' was mounted on a glass fiber. Cell parameters were determined by least-squares using 40412 ( $2.676 \leq \theta \leq 54.082^\circ$ ) reflections.

Intensity data were collected on a STOE STADIVARI diffractometer (Graded multilayer mirror monochromator; Cu-K $\alpha$  radiation,  $\lambda = 1.54186\text{\AA}$ ) at 100(2) K in the range  $1.338 \leq \theta \leq 27.041$ . A total of 40412 reflections were collected of which 16844 were unique [*R*(int) = 0.0375, *R*( $\sigma$ ) = 0.0425]; intensities of 12693 reflections were greater than  $2\sigma(I)$ . Completeness to  $\theta = 0.979$ . An integration absorption correction was applied to the data (the minimum and maximum transmission factors were 0.9380 and 0.9789).

The structure was solved by direct methods (and subsequent difference syntheses).

Anisotropic full-matrix least-squares refinement on *F*<sup>2</sup> for all non-hydrogen atoms yielded *R*<sub>1</sub> = 0.0574 and *wR*<sup>2</sup> = 0.1314 for 1332 [*I* > 2 $\sigma(I)$ ] and *R*<sub>1</sub> = 0.0841 and *wR*<sup>2</sup> = 0.1468 for all (16844) intensity data, (number of parameters = 980, goodness-of-fit = 1.165, the maximum and mean shift/esd is 3.227 and 0.052).

The maximum and minimum residual electron density in the final difference map was 1.130 and -0.603 e.Å<sup>-3</sup>.

The weighting scheme applied was  $w = 1/[\sigma^2(F_o^2) + (0.033100P)^2 + 18.412601P]$  where  $P = (F_o^2 + 2F_c^2)/3$ .

Hydrogen atomic positions were calculated from assumed geometries. Hydrogen atoms were included in structure factor calculations but they were not refined. The isotropic displacement parameters of the hydrogen atoms were approximated from the *U*(eq) value of the atom they were bonded to.

## Compound 6

*Crystal data:* C<sub>63.16</sub>H<sub>141.34</sub>B<sub>20</sub>K<sub>4</sub>N<sub>7</sub>O<sub>20.84</sub>S<sub>4</sub>, *Fwt.:* 1833.4, fluorescent yellow, prism-shaped, size: 0.37×0.10×0.05 mm, monoclinic, space group *P2<sub>1</sub>*, *a* = 13.8220(16) Å, *b* = 26.063(3) Å, *c* = 14.3906(18) Å,  $\alpha = 90^\circ$ ,  $\beta = 110.293(3)^\circ$ ,  $\gamma = 90^\circ$ , *V* = 4864.1(10) Å<sup>3</sup>, *T* = 150(2)K, *Z* = 2, *Z'* = 1, *F*(000) = 1952, *D<sub>x</sub>* = 1.252 Mg/m<sup>3</sup>,  $\mu$  0.333 mm<sup>-1</sup>.

Single fluorescent yellow prism-shaped crystals of **6** with dimensions 0.37 × 0.10 × 0.05 mm was mounted on a Mitegen Loop. Intensity data were collected using a Bruker Venture D8 APEX-II CCD diffractometer operating at *T* = 150(2) K ( monochromator; Mo-*K*α radiation,  $\lambda = 0.71073$  Å) in the range  $1.699 \leq \theta \leq 24.108$

The unit cell was refined using Bruker SAINT on 3079 reflections, 11% of the observed reflections.

A total of 27994 reflections were collected of which 13527 were unique [*R*<sub>int</sub> = 0.1367, *R*<sub>sigma</sub> = 0.1845]; intensities of 7977 reflections were greater than 2σ(*I*). Completeness to  $\theta = 0.997$ .

Multi-scan absorption correction was applied to the data, the and the minimum and maximum transmissions are 0.960 and 0.990.

The structure was solved and the space group *P2<sub>1</sub>* (# 4) determined by the ShelXT (Sheldrick, 2015) structure solution program using iterative methods and refined by full matrix least squares minimisation on *F*<sup>2</sup> using version 2018/3 of ShelXL (Sheldrick, 2015), managed by Olex2 1.5 (Dolomanov et al., 2009) as the graphical interface. All non-hydrogen atoms were refined anisotropically. Hydrogen atom positions were calculated geometrically and refined using the riding model. Hydrogen atom positions were calculated geometrically and refined using the riding model and 83% of the solvent (THF) was modeled.

The Flack parameter was refined to 0.00(6). Determination of absolute structure using Bayesian statistics on Bijvoet differences using the Olex2 results in None. The chiral atoms in this structure are: N2(R), N3(R), N4(R), N5(S), N6(S), N8(R). Note: The Flack parameter is used to determine chirality of the crystal studied, the value should be near 0, a value of 1 means that the stereochemistry is wrong and the model should be inverted. A value of 0.5 means that the crystal consists of a racemic mixture of the two enantiomers.

**Table S28.** Summary of structure determinations and refinement for **1** and **2**

|                                                              | <b>1</b>                                                                                                                                  | <b>2</b>                                                                                                                                   |
|--------------------------------------------------------------|-------------------------------------------------------------------------------------------------------------------------------------------|--------------------------------------------------------------------------------------------------------------------------------------------|
| CCDC number                                                  | 2333791                                                                                                                                   | 2333790                                                                                                                                    |
| Empirical formula                                            | C <sub>2</sub> H <sub>12</sub> B <sub>10</sub> S <sub>2</sub>                                                                             | C <sub>2</sub> H <sub>12</sub> B <sub>10</sub> S <sub>2</sub>                                                                              |
| Formula weight                                               | 208.34                                                                                                                                    | 208.34                                                                                                                                     |
| Temperature                                                  | 103(2)                                                                                                                                    | 103(2)                                                                                                                                     |
| Radiation and wavelength                                     | Mo-K $\alpha$ , $\lambda$ = 0.71075 Å                                                                                                     | Mo-K $\alpha$ , $\lambda$ = 0.71075 Å                                                                                                      |
| Crystal system                                               | monoclinic                                                                                                                                | monoclinic                                                                                                                                 |
| Space group                                                  | <i>P</i> 2 <sub>1</sub> / <i>n</i>                                                                                                        | <i>C</i> 2/ <i>c</i>                                                                                                                       |
| Unit cell dimensions                                         | <i>a</i> = 7.3227(6) Å<br><i>b</i> = 13.3818(10) Å<br><i>c</i> = 11.5551(8) Å<br>$\alpha$ = 90°<br>$\beta$ = 90.383(6)°<br>$\gamma$ = 90° | <i>a</i> = 10.8421(18) Å<br><i>b</i> = 8.7020(13) Å<br><i>c</i> = 12.067(2) Å<br>$\alpha$ = 90°<br>$\beta$ = 105.688(7)°<br>$\gamma$ = 90° |
| Volume                                                       | 1132.27(15) Å <sup>3</sup>                                                                                                                | 1096(1) Å <sup>3</sup>                                                                                                                     |
| <i>Z</i> , <i>Z'</i>                                         | 4, 1                                                                                                                                      | 4, 1                                                                                                                                       |
| Density (calculated)                                         | 1.222 Mg/m <sup>3</sup>                                                                                                                   | 1.262 Mg/m <sup>3</sup>                                                                                                                    |
| Absorption coefficient, $\mu$                                | 0.410 mm <sup>-1</sup>                                                                                                                    | 0.424 mm <sup>-1</sup>                                                                                                                     |
| <i>F</i> (000)                                               | 424                                                                                                                                       | 424                                                                                                                                        |
| Crystal colour                                               | colourless                                                                                                                                | colourless                                                                                                                                 |
| Crystal description                                          | block                                                                                                                                     | block                                                                                                                                      |
| Crystal size                                                 | 0.450 x 0.300 x 0.100 mm                                                                                                                  | 0.300 x 0.200 x 0.150 mm                                                                                                                   |
| Absorption correction                                        | numerical                                                                                                                                 | numerical                                                                                                                                  |
| Max. and min. transmission                                   | 0.987689 and 0.997209                                                                                                                     | 0.958962 and 0.980800                                                                                                                      |
| $\theta$ -range for data collection                          | 3.045 $\leq$ $\theta$ $\leq$ 25.341°                                                                                                      | 3.048 $\leq$ $\theta$ $\leq$ 25.345°                                                                                                       |
| Index ranges                                                 | -8 $\leq$ <i>h</i> $\leq$ 8;<br>-16 $\leq$ <i>k</i> $\leq$ 16;<br>-13 $\leq$ <i>l</i> $\leq$ 13                                           | -13 $\leq$ <i>h</i> $\leq$ 13;<br>-10 $\leq$ <i>k</i> $\leq$ 10;<br>-14 $\leq$ <i>l</i> $\leq$ 14                                          |
| Reflections collected                                        | 43625                                                                                                                                     | 11065                                                                                                                                      |
| Completeness to 2 $\theta$                                   | 0.998                                                                                                                                     | 0.996                                                                                                                                      |
| Independent reflections                                      | 2062 [ <i>R</i> (int) = 0.1445]                                                                                                           | 1009 [ <i>R</i> (int) = 0.0615]                                                                                                            |
| Reflections <i>I</i> > 2 $\sigma$ ( <i>I</i> )               | 1982                                                                                                                                      | 941                                                                                                                                        |
| Data / restraints / parameters                               | 2062 / 0 / 128                                                                                                                            | 1009 / 0 / 66                                                                                                                              |
| Goodness-of-fit on <i>F</i> <sup>2</sup>                     | 1.179                                                                                                                                     | 1.220                                                                                                                                      |
| Final <i>R</i> indices [ <i>I</i> > 2 $\sigma$ ( <i>I</i> )] | <i>R</i> <sub>1</sub> = 0.0525,<br><i>wR</i> <sup>2</sup> = 0.1190                                                                        | <i>R</i> <sub>1</sub> = 0.0565,<br><i>wR</i> <sup>2</sup> = 0.1317                                                                         |
| <i>R</i> indices (all data)                                  | <i>R</i> <sub>1</sub> = 0.0562,<br><i>wR</i> <sup>2</sup> = 0.1212                                                                        | <i>R</i> <sub>1</sub> = 0.0621,<br><i>wR</i> <sup>2</sup> = 0.1347                                                                         |
| Max. and mean shift/esd                                      | 0.001; 0.000                                                                                                                              | 0.001; 0.000                                                                                                                               |
| Largest diff. peak and hole                                  | 0.28; -0.28 e.Å <sup>-3</sup>                                                                                                             | 0.34; -0.27 e.Å <sup>-3</sup>                                                                                                              |

**Table S29.** Summary of structure determinations and refinement for **3-5**

|                                                             | <b>3</b>                                                                                                                                | <b>4</b>                                                                                                                               | <b>5</b>                                                                                                                                  |
|-------------------------------------------------------------|-----------------------------------------------------------------------------------------------------------------------------------------|----------------------------------------------------------------------------------------------------------------------------------------|-------------------------------------------------------------------------------------------------------------------------------------------|
| CCDC number                                                 | 2333792                                                                                                                                 | 2379108                                                                                                                                | 2333793                                                                                                                                   |
| Empirical formula                                           | C <sub>2</sub> H <sub>14</sub> B <sub>10</sub> N <sub>2</sub>                                                                           | C <sub>4</sub> H <sub>30</sub> B <sub>20</sub> Cl <sub>2</sub> CuN <sub>4</sub> O <sub>2</sub>                                         | C <sub>60</sub> H <sub>132</sub> B <sub>20</sub> K <sub>4</sub> O <sub>23</sub> S <sub>4</sub>                                            |
| Formula weight                                              | 174.25                                                                                                                                  | 516.96                                                                                                                                 | 1721.58                                                                                                                                   |
| Temperature                                                 | 103(2)                                                                                                                                  | 296(2)                                                                                                                                 | 100.15                                                                                                                                    |
| Radiation and wavelength                                    | Cu-K $\alpha$ , $\lambda$ =1.54187Å                                                                                                     | MoK $\alpha$ $\lambda$ =0.71073 Å                                                                                                      | Cu-K $\alpha$ , $\lambda$ =1.54186Å                                                                                                       |
| Crystal system                                              | monoclinic                                                                                                                              | monoclinic                                                                                                                             | monoclinic                                                                                                                                |
| Space group                                                 | <i>C</i> 2/ <i>c</i>                                                                                                                    | <i>C</i> 2/ <i>m</i>                                                                                                                   | <i>C</i> 1 <i>c</i> 1                                                                                                                     |
| Unit cell dimensions                                        | <i>a</i> =24.7966(6)Å<br><i>b</i> =6.9932(2)Å<br><i>c</i> =11.6138(3)Å<br>$\alpha$ =90°<br>$\beta$ =98.493(7)°<br>$\gamma$ =90°         | <i>a</i> =15.9986(11)<br><i>b</i> =12.1898(10)<br><i>c</i> =6.7272(5)<br>$\alpha$ =90°<br>$\beta$ =105.470(3)°<br>$\gamma$ =90°        | <i>a</i> =18.4531(6)Å<br><i>b</i> =25.6027(7)Å<br><i>c</i> =19.2303(6)Å<br>$\alpha$ =90°<br>$\beta$ =94.515(3)°<br>$\gamma$ =90°          |
| Volume                                                      | 1991.84(10)Å <sup>3</sup>                                                                                                               | 1264.41(17) Å <sup>3</sup>                                                                                                             | 9057.1(5)Å <sup>3</sup>                                                                                                                   |
| <i>Z</i> , <i>Z'</i>                                        | 8,1                                                                                                                                     | 2, 0.25                                                                                                                                | 4, 1                                                                                                                                      |
| Density (calculated)                                        | 1.162 Mg/m <sup>3</sup>                                                                                                                 | 1.358 Mg/m <sup>3</sup>                                                                                                                | 1.263 Mg/m <sup>3</sup>                                                                                                                   |
| Absorption coefficient, $\mu$                               | 0.382 mm <sup>-1</sup>                                                                                                                  | 1.088 mm <sup>-1</sup>                                                                                                                 | 3.126 mm <sup>-1</sup>                                                                                                                    |
| <i>F</i> (000)                                              | 720                                                                                                                                     | 522                                                                                                                                    | 3660                                                                                                                                      |
| Crystal colour                                              | colourless                                                                                                                              | blue                                                                                                                                   | colorless                                                                                                                                 |
| Crystal description                                         | block                                                                                                                                   | block                                                                                                                                  | plate                                                                                                                                     |
| Crystal size                                                | 0.500 x 0.480 x 0.150 mm                                                                                                                | 0.21×0.12×0.10 mm                                                                                                                      | 0.260 x 0.157 x 0.090 mm                                                                                                                  |
| Absorption correction                                       | numerical                                                                                                                               | multi-scan                                                                                                                             | multi-scan                                                                                                                                |
| Max. and min. transmission                                  | 0.977126 and 0.991424                                                                                                                   | 0.680 and 0.745                                                                                                                        | 0.4455 and 0.7559                                                                                                                         |
| $\theta$ -range for data collection                         | 3.605 $\leq$ $\theta$ $\leq$ 68.248°<br>-29 $\leq$ <i>h</i> $\leq$ 29;<br>-8 $\leq$ <i>k</i> $\leq$ 8;<br>-13 $\leq$ <i>l</i> $\leq$ 13 | 3.142 $\leq$ $\theta$ $\leq$ 25.741<br>-19 $\leq$ <i>h</i> $\leq$ 19,<br>-14 $\leq$ <i>k</i> $\leq$ 14,<br>-8 $\leq$ <i>l</i> $\leq$ 8 | 2.958 $\leq$ $\theta$ $\leq$ 70.204°<br>-22 $\leq$ <i>h</i> $\leq$ 22;<br>-30 $\leq$ <i>k</i> $\leq$ 30;<br>-22 $\leq$ <i>l</i> $\leq$ 22 |
| Index ranges                                                |                                                                                                                                         |                                                                                                                                        |                                                                                                                                           |
| Reflections collected                                       | 37471                                                                                                                                   | 8764                                                                                                                                   | 31158                                                                                                                                     |
| Completeness to 2 $\theta$                                  | 0.999                                                                                                                                   | 0.989                                                                                                                                  | 0.987                                                                                                                                     |
| Independent reflections                                     | 1828<br>[ <i>R</i> (int) =0.0453]                                                                                                       | 1257<br>[ <i>R</i> <sub>int</sub> = 0.0535]                                                                                            | 31158<br>[ <i>R</i> (int) =0.0371]                                                                                                        |
| Reflections <i>I</i> >2 $\sigma$ ( <i>I</i> )               | 1732                                                                                                                                    | 1183                                                                                                                                   | 22714                                                                                                                                     |
| Data / restraints / parameters                              | 1828 /0 /128                                                                                                                            | 1257/0/106                                                                                                                             | 31158 /39 /1023                                                                                                                           |
| Goodness-of-fit on <i>F</i> <sup>2</sup>                    | 1.131                                                                                                                                   | 1.105                                                                                                                                  | 1.015                                                                                                                                     |
| Final <i>R</i> indices [ <i>I</i> >2 $\sigma$ ( <i>I</i> )] | <i>R</i> <sub>1</sub> =0.0509,<br><i>wR</i> <sup>2</sup> =0.1305                                                                        | <i>R</i> <sub>1</sub> =0.0260,<br><i>wR</i> <sup>2</sup> =0.1305                                                                       | <i>R</i> <sub>1</sub> =0.0472,<br><i>wR</i> <sup>2</sup> =0.1090                                                                          |
| <i>R</i> indices (all data)                                 | <i>R</i> <sub>1</sub> =0.0533,<br><i>wR</i> <sup>2</sup> =0.1323                                                                        | <i>R</i> <sub>1</sub> =0.0293,<br><i>wR</i> <sup>2</sup> =0.1323                                                                       | <i>R</i> <sub>1</sub> =0.0763,<br><i>wR</i> <sup>2</sup> =0.1218                                                                          |
| Max. and mean shift/esd                                     | 0.001;0.000                                                                                                                             | 0.000                                                                                                                                  | 0.152 ;0.008                                                                                                                              |
| Largest diff. peak and hole                                 | 0.22;-0.26 e.Å <sup>-3</sup>                                                                                                            | 0.246;-0.167 e.Å <sup>-3</sup>                                                                                                         | 0.48;-0.34 e.Å <sup>-3</sup>                                                                                                              |

**Table S30.** Summary of structure determinations and refinement for **5'** and **6**

|                                                             | <b>5'</b>                                                                                                                         | <b>6</b>                                                                                                                             |
|-------------------------------------------------------------|-----------------------------------------------------------------------------------------------------------------------------------|--------------------------------------------------------------------------------------------------------------------------------------|
| CCDC number                                                 | 2371840                                                                                                                           | 2379108                                                                                                                              |
| Empirical formula                                           | C <sub>40</sub> H <sub>94</sub> B <sub>20</sub> K <sub>4</sub> O <sub>19</sub> S <sub>4</sub> , 4(CH <sub>3</sub> CN)             | C <sub>63.16</sub> H <sub>141.34</sub> B <sub>20</sub> K <sub>4</sub> N <sub>7</sub> O <sub>20.84</sub> S <sub>4</sub>               |
| Formula weight                                              | 1523.67                                                                                                                           | 1833.34                                                                                                                              |
| Temperature                                                 | 100.15                                                                                                                            | 150(2)                                                                                                                               |
| Radiation and wavelength                                    | Mo-K $\alpha$ , $\lambda$ =0.71073Å                                                                                               | Mo-K $\alpha$ , $\lambda$ =0.71073Å                                                                                                  |
| Crystal system                                              | monoclinic                                                                                                                        | monoclinic                                                                                                                           |
| Space group                                                 | <i>P</i> 1 2 <sub>1</sub> / <i>n</i> 1                                                                                            | <i>P</i> 2 <sub>1</sub>                                                                                                              |
| Unit cell dimensions                                        | <i>a</i> =16.1368(6)Å<br><i>b</i> =25.8487(14)Å<br><i>c</i> =18.8254(8)Å<br>$\alpha$ =90°<br>$\beta$ =90.405(3)°<br>$\gamma$ =90° | <i>a</i> =13.8220(16)Å<br><i>b</i> =26.063(3)Å<br><i>c</i> =14.3906(18) Å<br>$\alpha$ =90°<br>$\beta$ =110.239(3) °<br>$\gamma$ =90° |
| Volume                                                      | 7852.2(6)Å <sup>3</sup>                                                                                                           | 4864.1(10)                                                                                                                           |
| <i>Z</i> , <i>Z'</i>                                        | 4, 1                                                                                                                              | 2, 1                                                                                                                                 |
| Density (calculated)                                        | 1.289 Mg/m <sup>3</sup>                                                                                                           | 1.252 Mg/m <sup>3</sup>                                                                                                              |
| Absorption coefficient, $\mu$                               | 0.395 mm <sup>-1</sup>                                                                                                            | 0.333 mm <sup>-1</sup>                                                                                                               |
| <i>F</i> (000)                                              | 3212                                                                                                                              | 1952                                                                                                                                 |
| Crystal colour                                              | colourless                                                                                                                        | fluorescent yellow                                                                                                                   |
| Crystal description                                         | prism                                                                                                                             | prism                                                                                                                                |
| Crystal size                                                | 0.17 x 0.13 x 0.08 mm                                                                                                             | 0.37×0.10×0.05 mm                                                                                                                    |
| Absorption correction                                       | integration                                                                                                                       | multi-scan                                                                                                                           |
| Max. and min. transmission                                  | 0.9789 and 0.9380                                                                                                                 | 0.960 and 0.990                                                                                                                      |
| $\theta$ -range for data collection                         | 1.338 $\leq$ $\theta$ $\leq$ 27.041°                                                                                              | 3.398 $\leq$ $\theta$ $\leq$ 48.216                                                                                                  |
| Index ranges                                                | -20 $\leq$ <i>h</i> $\leq$ 20;<br>-32 $\leq$ <i>k</i> $\leq$ 28;<br>-23 $\leq$ <i>l</i> $\leq$ 23                                 | -15 $\leq$ <i>h</i> $\leq$ 15,<br>-29 $\leq$ <i>k</i> $\leq$ 27,<br>-16 $\leq$ <i>l</i> $\leq$ 16                                    |
| Reflections collected                                       | 40412                                                                                                                             | 27994                                                                                                                                |
| Completeness to 2 $\theta$                                  | 0.999                                                                                                                             | 0.997                                                                                                                                |
| Independent reflections                                     | 16844 [ <i>R</i> (int) =0.0375]                                                                                                   | 13527 [ <i>R</i> <sub>int</sub> = 0.1367]                                                                                            |
| Reflections <i>I</i> >2 $\sigma$ ( <i>I</i> )               | 12693                                                                                                                             | 7977                                                                                                                                 |
| Data / restraints / parameters                              | 16844 /3 /980                                                                                                                     | 13527/66/1081                                                                                                                        |
| Goodness-of-fit on <i>F</i> <sup>2</sup>                    | 1.165                                                                                                                             | 1.002                                                                                                                                |
| Final <i>R</i> indices [ <i>I</i> >2 $\sigma$ ( <i>I</i> )] | <i>R</i> <sub>1</sub> =0.0574,<br><i>wR</i> <sup>2</sup> =0.1314                                                                  | <i>R</i> <sub>1</sub> = 0.0792,<br><i>wR</i> <sub>2</sub> = 0.1484                                                                   |
| <i>R</i> indices (all data)                                 | <i>R</i> <sub>1</sub> =0.0841,<br><i>wR</i> <sup>2</sup> =0.1468                                                                  | <i>R</i> <sub>1</sub> = 0.1448,<br><i>wR</i> <sub>2</sub> = 0.1812                                                                   |
| Max. and mean shift/esd                                     | 0.006;0.001                                                                                                                       | 0.001                                                                                                                                |
| Largest diff. peak and hole                                 | 0.84 and 0.57 e.Å <sup>-3</sup>                                                                                                   | 0.52 and-0.377 e.Å <sup>-3</sup>                                                                                                     |

## XYZ Geometries and Energies

26

1-NH<sub>2</sub>-*ortho*-carborane, E(B3LYP/aug-cc-pVTZ)= -387.573409

|   |           |           |           |
|---|-----------|-----------|-----------|
| C | 0.000000  | 0.000000  | 0.000000  |
| C | 0.000000  | 0.000000  | 1.684615  |
| B | 1.490259  | 0.000000  | 0.860284  |
| B | 1.230963  | 1.039259  | -0.558812 |
| B | -0.469936 | 1.540936  | -0.558819 |
| B | -1.251728 | 0.808718  | 0.860251  |
| B | 1.213917  | 0.978825  | 2.320348  |
| B | 2.006530  | 1.685406  | 0.894260  |
| B | 0.782106  | 2.651780  | 0.026508  |
| B | -0.770748 | 2.504540  | 0.894226  |
| B | -0.488447 | 1.480921  | 2.320333  |
| B | 0.770949  | 2.613876  | 1.799536  |
| N | -0.359547 | -1.219042 | -0.615063 |
| H | 3.156328  | 1.953250  | 0.904988  |
| H | -1.591172 | 3.353470  | 0.904953  |
| H | 1.048409  | 3.554583  | 2.456853  |
| H | 1.066161  | 3.614819  | -0.595717 |
| H | -2.317011 | 0.308024  | 0.838289  |
| H | -1.077321 | 1.567572  | -1.570195 |
| H | -1.117046 | 1.477212  | 3.317367  |
| H | 1.739892  | 0.634578  | 3.317380  |
| H | 2.113311  | -0.998662 | 0.838310  |
| H | 1.755607  | 0.732010  | -1.570175 |
| H | -0.279412 | -0.947336 | 2.114983  |
| H | 0.389446  | -1.610818 | -1.167006 |
| H | -1.201408 | -1.141714 | -1.166798 |

26

1-PH<sub>2</sub>-*ortho*-carborane, E(B3LYP/aug-cc-pVTZ)= -674.172571

|   |          |          |          |
|---|----------|----------|----------|
| C | 0.000000 | 0.000000 | 0.000000 |
| C | 0.000000 | 0.000000 | 1.650552 |

|   |           |           |           |
|---|-----------|-----------|-----------|
| B | 1.503639  | 0.000000  | 0.839266  |
| B | 1.229836  | 1.034097  | -0.578203 |
| B | -0.471500 | 1.536041  | -0.578213 |
| B | -1.262819 | 0.816193  | 0.839218  |
| B | 1.215665  | 0.978136  | 2.296417  |
| B | 2.008580  | 1.688412  | 0.875321  |
| B | 0.781229  | 2.647851  | 0.002533  |
| B | -0.770375 | 2.508301  | 0.875288  |
| B | -0.490046 | 1.481371  | 2.296390  |
| B | 0.771205  | 2.613921  | 1.778463  |
| P | -0.480082 | -1.627402 | -0.791598 |
| H | 3.157766  | 1.958676  | 0.883625  |
| H | -1.588772 | 3.359119  | 0.883588  |
| H | 1.048534  | 3.553954  | 2.437028  |
| H | 1.064946  | 3.609528  | -0.621831 |
| H | -2.329995 | 0.318597  | 0.830531  |
| H | -1.076506 | 1.573756  | -1.588956 |
| H | -1.110826 | 1.469399  | 3.298186  |
| H | 1.730499  | 0.631123  | 3.298232  |
| H | 2.129777  | -0.997206 | 0.830587  |
| H | 1.758420  | 0.737348  | -1.588942 |
| H | -0.276456 | -0.937032 | 2.105762  |
| H | 0.589814  | -1.666153 | -1.718728 |
| H | -1.399836 | -1.079288 | -1.718623 |

27

1-CH<sub>3</sub>-*ortho*-carborane, E(B3LYP/aug-cc-pVTZ)= -371.529272

|   |           |          |           |
|---|-----------|----------|-----------|
| C | 0.000000  | 0.000000 | 0.000000  |
| C | 0.000000  | 0.000000 | 1.644643  |
| B | 1.506359  | 0.000000 | 0.841302  |
| B | 1.233494  | 1.026651 | -0.573827 |
| B | -0.465663 | 1.535759 | -0.573750 |
| B | -1.258190 | 0.828332 | 0.841426  |
| B | 1.220692  | 0.974535 | 2.296148  |
| B | 2.016562  | 1.684623 | 0.877923  |

|   |           |           |           |
|---|-----------|-----------|-----------|
| B | 0.792236  | 2.643970  | 0.001262  |
| B | -0.757916 | 2.515982  | 0.877916  |
| B | -0.483606 | 1.485297  | 2.296171  |
| B | 0.783169  | 2.613591  | 1.779054  |
| C | -0.382742 | -1.277285 | -0.723494 |
| H | 3.166791  | 1.950780  | 0.886461  |
| H | -1.572221 | 3.370838  | 0.886455  |
| H | 1.064247  | 3.551513  | 2.439170  |
| H | 1.079930  | 3.604221  | -0.623544 |
| H | -2.325584 | 0.331719  | 0.827686  |
| H | -1.070101 | 1.568809  | -1.585905 |
| H | -1.102486 | 1.474400  | 3.299395  |
| H | 1.731736  | 0.625131  | 3.299310  |
| H | 2.124796  | -1.001752 | 0.827639  |
| H | 1.756476  | 0.721925  | -1.586006 |
| H | -0.279781 | -0.933625 | 2.104191  |
| H | 0.437705  | -1.612175 | -1.353605 |
| H | -0.618024 | -2.071917 | -0.017444 |
| H | -1.255257 | -1.107277 | -1.349695 |

27

1-SiH<sub>3</sub>-*ortho*-carborane, E(B3LYP/aug-cc-pVTZ)= -622.923378

|    |           |           |           |
|----|-----------|-----------|-----------|
| C  | 0.000000  | 0.000000  | 0.000000  |
| C  | 0.000000  | 0.000000  | 1.646219  |
| B  | 1.506129  | 0.000000  | 0.838267  |
| B  | 1.230753  | 1.032829  | -0.576685 |
| B  | -0.468982 | 1.536771  | -0.576722 |
| B  | -1.262763 | 0.820943  | 0.838281  |
| B  | 1.217793  | 0.977097  | 2.294776  |
| B  | 2.012067  | 1.688247  | 0.876024  |
| B  | 0.785054  | 2.648042  | 0.000735  |
| B  | -0.766770 | 2.512098  | 0.876063  |
| B  | -0.488419 | 1.482888  | 2.294811  |
| B  | 0.775338  | 2.615089  | 1.777020  |
| Si | -0.474591 | -1.600857 | -0.916801 |



|   |           |           |           |
|---|-----------|-----------|-----------|
| H | 3.161112  | 1.958994  | 0.884575  |
| H | -1.582597 | 3.365347  | 0.884649  |
| H | 1.053737  | 3.554116  | 2.436863  |
| H | 1.070310  | 3.610196  | -0.622085 |
| H | -2.333253 | 0.329343  | 0.832599  |
| H | -1.074403 | 1.578694  | -1.587912 |
| H | -1.107552 | 1.470811  | 3.297762  |
| H | 1.730294  | 0.629457  | 3.297706  |
| H | 2.135739  | -0.995592 | 0.832543  |
| H | 1.761160  | 0.738012  | -1.587903 |
| H | -0.276275 | -0.931931 | 2.111223  |
| H | -1.665564 | -1.337143 | -1.749485 |
| H | 0.668000  | -2.029392 | -1.748766 |
| H | -0.778940 | -2.625820 | 0.109022  |

25

1-OH-*ortho*-carborane, E(B3LYP/aug-cc-pVTZ)= -407.441427

|   |           |           |           |
|---|-----------|-----------|-----------|
| C | 0.000000  | 0.000000  | 0.000000  |
| C | 0.000000  | 0.000000  | 1.663080  |
| B | 1.503513  | 0.000000  | 0.861223  |
| B | 1.232899  | 1.008839  | -0.577758 |
| B | -0.472313 | 1.526606  | -0.590869 |
| B | -1.260485 | 0.814677  | 0.831059  |
| B | 1.216499  | 0.989174  | 2.302606  |
| B | 2.012699  | 1.678784  | 0.871023  |
| B | 0.788221  | 2.631889  | -0.015954 |
| B | -0.764145 | 2.506192  | 0.856070  |
| B | -0.490429 | 1.486971  | 2.286749  |
| B | 0.774054  | 2.615831  | 1.760395  |
| O | -0.388631 | -1.165584 | -0.607683 |
| H | 0.375715  | -1.581989 | -1.022480 |
| H | 3.162185  | 1.947217  | 0.875585  |
| H | -1.579277 | 3.359632  | 0.860554  |
| H | 1.051116  | 3.562418  | 2.408877  |
| H | 1.079869  | 3.584715  | -0.649634 |

|   |           |           |           |
|---|-----------|-----------|-----------|
| H | -2.319624 | 0.305577  | 0.812254  |
| H | -1.069691 | 1.539704  | -1.605574 |
| H | -1.117315 | 1.490547  | 3.284496  |
| H | 1.730043  | 0.654777  | 3.309247  |
| H | 2.110000  | -1.010091 | 0.836428  |
| H | 1.753571  | 0.682666  | -1.585686 |
| H | -0.285472 | -0.940130 | 2.105791  |

25

1-SH-*ortho*-carborane, E(B3LYP/aug-cc-pVTZ)= -730.413177

|   |           |           |           |
|---|-----------|-----------|-----------|
| C | 0.000000  | 0.000000  | 0.000000  |
| C | 0.000000  | 0.000000  | 1.661894  |
| B | 1.502699  | 0.000000  | 0.850032  |
| B | 1.229206  | 1.026245  | -0.580038 |
| B | -0.473427 | 1.535845  | -0.583369 |
| B | -1.262689 | 0.812625  | 0.836905  |
| B | 1.212999  | 0.984021  | 2.301442  |
| B | 2.005754  | 1.685392  | 0.874358  |
| B | 0.780734  | 2.644132  | -0.001377 |
| B | -0.772008 | 2.506121  | 0.868554  |
| B | -0.491883 | 1.483320  | 2.295286  |
| B | 0.767921  | 2.616516  | 1.773374  |
| S | -0.522573 | -1.504343 | -0.837051 |
| H | 3.155478  | 1.952836  | 0.879747  |
| H | -1.592136 | 3.354895  | 0.876346  |
| H | 1.044700  | 3.558841  | 2.428405  |
| H | 1.067146  | 3.602112  | -0.629632 |
| H | -2.326983 | 0.311493  | 0.825485  |
| H | -1.075852 | 1.561766  | -1.594468 |
| H | -1.118163 | 1.476764  | 3.293487  |
| H | 1.729844  | 0.639102  | 3.302864  |
| H | 2.128690  | -0.996139 | 0.838606  |
| H | 1.756640  | 0.722312  | -1.588721 |
| H | -0.280976 | -0.939462 | 2.108047  |
| H | 0.714673  | -1.975792 | -1.073744 |

24

1-Cl-*ortho*-carborane, E(B3LYP/aug-cc-pVTZ)= -791.814908

|    |           |           |           |
|----|-----------|-----------|-----------|
| C  | 0.000000  | 0.000000  | 0.000000  |
| C  | 0.000000  | 0.000000  | 1.636158  |
| B  | 1.517994  | 0.000000  | 0.825659  |
| B  | 1.227099  | 1.005716  | -0.612077 |
| B  | -0.487406 | 1.509868  | -0.612084 |
| B  | -1.276400 | 0.821652  | 0.825664  |
| B  | 1.219222  | 0.992323  | 2.265459  |
| B  | 2.006398  | 1.687426  | 0.832908  |
| B  | 0.772164  | 2.626112  | -0.052804 |
| B  | -0.773710 | 2.504878  | 0.832914  |
| B  | -0.488058 | 1.494332  | 2.265446  |
| B  | 0.770569  | 2.620657  | 1.725035  |
| Cl | -0.441184 | -1.500370 | -0.800386 |
| H  | 3.154466  | 1.960408  | 0.831934  |
| H  | -1.591296 | 3.355839  | 0.831934  |
| H  | 1.049628  | 3.569774  | 2.368719  |
| H  | 1.051451  | 3.575976  | -0.696012 |
| H  | -2.333640 | 0.309872  | 0.815184  |
| H  | -1.090912 | 1.516860  | -1.622505 |
| H  | -1.102653 | 1.492913  | 3.270693  |
| H  | 1.735237  | 0.658476  | 3.270708  |
| H  | 2.129955  | -1.002585 | 0.815175  |
| H  | 1.738344  | 0.684923  | -1.622492 |
| H  | -0.275207 | -0.935916 | 2.093347  |

24

1-O-*ortho*-carborane, E(B3LYP/aug-cc-pVTZ)= -406.932214

|   |           |          |           |
|---|-----------|----------|-----------|
| C | 0.000000  | 0.000000 | 0.000000  |
| C | 0.000000  | 0.000000 | 2.291862  |
| B | 1.402034  | 0.000000 | 1.413595  |
| B | 1.263473  | 1.044136 | -0.041687 |
| B | -0.543445 | 1.546366 | -0.041695 |

|   |           |           |           |
|---|-----------|-----------|-----------|
| B | -1.200961 | 0.723456  | 1.413591  |
| B | 1.193188  | 0.997330  | 2.889913  |
| B | 1.962938  | 1.681104  | 1.461785  |
| B | 0.732419  | 2.635247  | 0.574457  |
| B | -0.813950 | 2.452892  | 1.461756  |
| B | -0.507404 | 1.470004  | 2.889911  |
| B | 0.729367  | 2.624166  | 2.340020  |
| O | -0.287051 | -1.032743 | -0.554897 |
| H | 3.109144  | 1.990938  | 1.442865  |
| H | -1.635882 | 3.309754  | 1.442821  |
| H | 0.999273  | 3.595208  | 2.967324  |
| H | 1.005357  | 3.617227  | -0.036454 |
| H | -2.286683 | 0.247883  | 1.393477  |
| H | -1.167060 | 1.780128  | -1.022449 |
| H | -1.151366 | 1.518286  | 3.885255  |
| H | 1.769706  | 0.706382  | 3.885254  |
| H | 2.086642  | -0.967614 | 1.393469  |
| H | 1.918291  | 0.922566  | -1.022427 |
| H | -0.252343 | -0.907869 | 2.818768  |

24

1-S<sup>-</sup>-*ortho*-carborane, E(B3LYP/aug-cc-pVTZ)= -729.897833

|   |           |           |           |
|---|-----------|-----------|-----------|
| C | 0.000000  | 0.000000  | 0.000000  |
| C | 0.000000  | 0.000000  | 1.748536  |
| B | 1.484794  | 0.000000  | 0.939672  |
| B | 1.263597  | 1.073645  | -0.444316 |
| B | -0.432146 | 1.600816  | -0.444327 |
| B | -1.223104 | 0.841797  | 0.939679  |
| B | 1.220020  | 0.942926  | 2.429570  |
| B | 2.030490  | 1.678373  | 1.043037  |
| B | 0.832113  | 2.676613  | 0.188299  |
| B | -0.721088 | 2.533753  | 1.043070  |
| B | -0.470404 | 1.468430  | 2.429570  |
| B | 0.808757  | 2.601583  | 1.963779  |
| S | -0.452045 | -1.454121 | -0.854221 |

|   |           |           |           |
|---|-----------|-----------|-----------|
| H | 3.187774  | 1.935637  | 1.070748  |
| H | -1.528547 | 3.401797  | 1.070790  |
| H | 1.095292  | 3.523266  | 2.653003  |
| H | 1.138000  | 3.660532  | -0.400499 |
| H | -2.313574 | 0.399374  | 0.924747  |
| H | -1.029996 | 1.736484  | -1.452070 |
| H | -1.110683 | 1.449051  | 3.424791  |
| H | 1.736456  | 0.563962  | 3.424797  |
| H | 2.132230  | -0.982697 | 0.924749  |
| H | 1.833007  | 0.846439  | -1.452050 |
| H | -0.296020 | -0.952204 | 2.155335  |

26

3-NH<sub>2</sub>-*ortho*-carborane, E(B3LYP/aug-cc-pVTZ)= -387.610358

|   |           |           |           |
|---|-----------|-----------|-----------|
| C | 0.000000  | 0.000000  | 0.000000  |
| C | 0.000000  | 0.000000  | 1.595657  |
| B | 1.587527  | 0.000000  | 0.797957  |
| B | 1.213545  | 1.000120  | -0.626337 |
| B | -0.502655 | 1.476623  | -0.636016 |
| B | -1.293952 | 0.802472  | 0.797784  |
| B | 1.213424  | 1.000234  | 2.222112  |
| B | 1.987255  | 1.725461  | 0.797900  |
| B | 0.735887  | 2.628732  | -0.091382 |
| B | -0.807643 | 2.488020  | 0.797747  |
| B | -0.502756 | 1.476667  | 2.231608  |
| B | 0.735781  | 2.628776  | 1.686945  |
| N | 2.333957  | -1.235266 | 0.797958  |
| H | -0.242460 | -0.938333 | 2.066231  |
| H | -1.630401 | 3.334296  | 0.797689  |
| H | 3.130973  | 2.022251  | 0.797941  |
| H | 0.998886  | 3.581292  | -0.738274 |
| H | 0.998756  | 3.581413  | 2.333744  |
| H | 1.728553  | 0.687851  | 3.237544  |
| H | 1.728755  | 0.687710  | -1.641711 |
| H | -1.098958 | 1.477728  | -1.652785 |

|   |           |           |           |
|---|-----------|-----------|-----------|
| H | -2.349519 | 0.282477  | 0.797801  |
| H | -1.099141 | 1.477806  | 3.248330  |
| H | -0.242347 | -0.938368 | -0.470556 |
| H | 2.867507  | -1.452050 | 1.624799  |
| H | 2.868821  | -1.451239 | -0.028245 |

26

3-PH<sub>2</sub>-*ortho*-carborane, E(B3LYP/aug-cc-pVTZ)= -674.185601

|   |           |           |           |
|---|-----------|-----------|-----------|
| C | 0.000000  | 0.000000  | 0.000000  |
| C | 0.000000  | 0.000000  | 1.613138  |
| B | 1.535017  | 0.000000  | 0.810898  |
| B | 1.210714  | 1.002159  | -0.624205 |
| B | -0.504619 | 1.484773  | -0.631486 |
| B | -1.289330 | 0.800572  | 0.803728  |
| B | 1.207622  | 1.008690  | 2.241112  |
| B | 1.984757  | 1.710727  | 0.808633  |
| B | 0.738349  | 2.627091  | -0.084487 |
| B | -0.807617 | 2.490768  | 0.802893  |
| B | -0.507793 | 1.486867  | 2.240010  |
| B | 0.735074  | 2.631783  | 1.693934  |
| P | 2.540690  | -1.672876 | 0.795970  |
| H | -0.266215 | -0.930240 | 2.088053  |
| H | -1.632605 | 3.334853  | 0.800935  |
| H | 3.128464  | 2.003185  | 0.809439  |
| H | 1.008631  | 3.578994  | -0.728822 |
| H | 1.002170  | 3.585602  | 2.336650  |
| H | 1.721033  | 0.698617  | 3.255846  |
| H | 1.728410  | 0.688948  | -1.636014 |
| H | -1.105109 | 1.481157  | -1.645363 |
| H | -2.342647 | 0.276865  | 0.803335  |
| H | -1.112996 | 1.485323  | 3.251171  |
| H | -0.259483 | -0.932820 | -0.473413 |
| H | 3.534786  | -1.250509 | -0.121115 |
| H | 3.326679  | -1.400278 | 1.943634  |

27

3-CH<sub>3</sub>-*ortho*-carborane, E(B3LYP/aug-cc-pVTZ)= -371.541045

|   |           |           |           |
|---|-----------|-----------|-----------|
| C | 0.000000  | 0.000000  | 0.000000  |
| C | 0.000000  | 0.000000  | 1.616210  |
| B | 1.536158  | 0.000000  | 0.808246  |
| B | 1.193329  | 1.014562  | -0.624171 |
| B | -0.523043 | 1.482454  | -0.627745 |
| B | -1.295938 | 0.786178  | 0.808016  |
| B | 1.193150  | 1.014768  | 2.240475  |
| B | 1.966211  | 1.718413  | 0.808179  |
| B | 0.712437  | 2.632581  | -0.081575 |
| B | -0.832053 | 2.482385  | 0.807948  |
| B | -0.523238 | 1.482592  | 2.243810  |
| B | 0.712277  | 2.632665  | 1.697684  |
| C | 2.428283  | -1.301293 | 0.808449  |
| H | -0.256568 | -0.932354 | 2.091871  |
| H | -1.664691 | 3.319181  | 0.807853  |
| H | 3.108130  | 2.021634  | 0.808169  |
| H | 0.974537  | 3.588733  | -0.723414 |
| H | 0.974318  | 3.588893  | 2.339438  |
| H | 1.716770  | 0.703893  | 3.250436  |
| H | 1.717088  | 0.703622  | -1.634055 |
| H | -1.129331 | 1.475425  | -1.638566 |
| H | -2.345650 | 0.254372  | 0.808034  |
| H | -1.129640 | 1.475598  | 3.254559  |
| H | -0.256428 | -0.932419 | -0.475590 |
| H | 3.063613  | -1.339498 | 1.693871  |
| H | 1.838895  | -2.221118 | 0.793117  |
| H | 3.085058  | -1.324262 | -0.061689 |

27

3-SiH<sub>3</sub>-*ortho*-carborane, E(B3LYP/aug-cc-pVTZ)= -622.920805

|   |          |          |          |
|---|----------|----------|----------|
| C | 0.000000 | 0.000000 | 0.000000 |
| C | 0.000000 | 0.000000 | 1.618331 |
| B | 1.527149 | 0.000000 | 0.809164 |

|    |           |           |           |
|----|-----------|-----------|-----------|
| B  | 1.203949  | 1.008873  | -0.623942 |
| B  | -0.512627 | 1.486755  | -0.627010 |
| B  | -1.289797 | 0.793643  | 0.809164  |
| B  | 1.203949  | 1.008873  | 2.242274  |
| B  | 1.975974  | 1.713976  | 0.809163  |
| B  | 0.727118  | 2.632108  | -0.080605 |
| B  | -0.816711 | 2.489403  | 0.809140  |
| B  | -0.512628 | 1.486756  | 2.245342  |
| B  | 0.727085  | 2.632138  | 1.698949  |
| Si | 2.686393  | -1.647042 | 0.809257  |
| H  | -0.266426 | -0.927428 | 2.098065  |
| H  | -1.646325 | 3.329224  | 0.809120  |
| H  | 3.118803  | 2.010465  | 0.809159  |
| H  | 0.993701  | 3.585873  | -0.723699 |
| H  | 0.993627  | 3.585893  | 2.342073  |
| H  | 1.719703  | 0.701182  | 3.256981  |
| H  | 1.719704  | 0.701180  | -1.638653 |
| H  | -1.117711 | 1.482140  | -1.638251 |
| H  | -2.341603 | 0.266533  | 0.809151  |
| H  | -1.117727 | 1.482141  | 3.256573  |
| H  | -0.266410 | -0.927431 | -0.479734 |
| H  | 4.122871  | -1.280083 | 0.808079  |
| H  | 2.411936  | -2.482260 | 2.009840  |
| H  | 2.410330  | -2.483557 | -0.390063 |

25

3-OH-*ortho*-carborane, E(B3LYP/aug-cc-pVTZ)= -407.4991174

|   |           |          |           |
|---|-----------|----------|-----------|
| C | 0.000000  | 0.000000 | 0.000000  |
| C | 0.000000  | 0.000000 | 1.625802  |
| B | 1.540042  | 0.000000 | 0.810633  |
| B | 1.189468  | 1.015076 | -0.628199 |
| B | -0.521833 | 1.487292 | -0.623895 |
| B | -1.289024 | 0.781337 | 0.814063  |
| B | 1.191209  | 1.013261 | 2.251525  |
| B | 1.973788  | 1.708510 | 0.811431  |



|   |           |           |           |
|---|-----------|-----------|-----------|
| B | 0.721067  | 2.627718  | -0.077710 |
| B | -0.824045 | 2.480962  | 0.813849  |
| B | -0.520155 | 1.487230  | 2.250833  |
| B | 0.722814  | 2.626979  | 1.703268  |
| O | 2.246380  | -1.190071 | 0.808113  |
| H | 3.198782  | -1.078793 | 0.832338  |
| H | -0.240660 | -0.940578 | 2.094140  |
| H | -1.652110 | 3.321651  | 0.814410  |
| H | 3.118495  | 2.005278  | 0.811108  |
| H | 0.988076  | 3.585268  | -0.715122 |
| H | 0.991040  | 3.584006  | 2.340968  |
| H | 1.723703  | 0.693167  | 3.253760  |
| H | 1.720176  | 0.695065  | -1.631282 |
| H | -1.133218 | 1.485546  | -1.631368 |
| H | -2.341370 | 0.255400  | 0.813972  |
| H | -1.129621 | 1.484997  | 3.259476  |
| H | -0.242163 | -0.940051 | -0.468672 |

25

3-SH-*ortho*-carborane, E(B3LYP/aug-cc-pVTZ)= -730.447542

|   |           |           |           |
|---|-----------|-----------|-----------|
| C | 0.000000  | 0.000000  | 0.000000  |
| C | 0.000000  | 0.000000  | 1.609970  |
| B | 1.543841  | 0.000000  | 0.790738  |
| B | 1.211222  | 1.007542  | -0.635648 |
| B | -0.502108 | 1.488974  | -0.626335 |
| B | -1.285954 | 0.808461  | 0.813854  |
| B | 1.225231  | 0.994866  | 2.227917  |
| B | 1.996620  | 1.708164  | 0.793581  |
| B | 0.744631  | 2.629608  | -0.084716 |
| B | -0.793520 | 2.495155  | 0.812147  |
| B | -0.489515 | 1.486245  | 2.244250  |
| B | 0.758312  | 2.623528  | 1.693040  |
| S | 2.553942  | -1.551505 | 0.711685  |
| H | -0.249656 | -0.936039 | 2.081023  |
| H | -1.613583 | 3.343605  | 0.817584  |

|   |           |           |           |
|---|-----------|-----------|-----------|
| H | 3.141850  | 1.991576  | 0.789213  |
| H | 1.012039  | 3.583052  | -0.727551 |
| H | 1.033866  | 3.572224  | 2.339547  |
| H | 1.746263  | 0.677078  | 3.236820  |
| H | 1.721379  | 0.690295  | -1.649289 |
| H | -1.109290 | 1.491647  | -1.636088 |
| H | -2.341880 | 0.290255  | 0.814473  |
| H | -1.081963 | 1.485398  | 3.262850  |
| H | -0.262731 | -0.931511 | -0.473623 |
| H | 2.956556  | -1.526463 | 1.994106  |

24

3-Cl-*ortho*-carborane, E(B3LYP/aug-cc-pVTZ)= -791.870117

|    |           |           |           |
|----|-----------|-----------|-----------|
| C  | 0.000000  | 0.000000  | 0.000000  |
| C  | 0.000000  | 0.000000  | 1.624402  |
| B  | 1.523905  | 0.000000  | 0.812186  |
| B  | 1.214927  | 1.000405  | -0.626420 |
| B  | -0.497262 | 1.488923  | -0.624876 |
| B  | -1.281297 | 0.801981  | 0.812205  |
| B  | 1.214926  | 1.000404  | 2.250821  |
| B  | 2.000293  | 1.695680  | 0.812182  |
| B  | 0.755064  | 2.621994  | -0.077556 |
| B  | -0.790736 | 2.491640  | 0.812198  |
| B  | -0.497262 | 1.488924  | 2.249278  |
| B  | 0.755053  | 2.622018  | 1.701948  |
| Cl | 2.500647  | -1.492664 | 0.812178  |
| H  | -0.253413 | -0.935683 | 2.095197  |
| H  | -1.609098 | 3.341506  | 0.812196  |
| H  | 3.146967  | 1.972227  | 0.812164  |
| H  | 1.030403  | 3.573949  | -0.718921 |
| H  | 1.030382  | 3.573976  | 2.343314  |
| H  | 1.737884  | 0.673708  | 3.254042  |
| H  | 1.737872  | 0.673717  | -1.629650 |
| H  | -1.102766 | 1.491529  | -1.635432 |
| H  | -2.337624 | 0.284963  | 0.812189  |

|   |           |           |           |
|---|-----------|-----------|-----------|
| H | -1.102767 | 1.491530  | 3.259835  |
| H | -0.253413 | -0.935682 | -0.470795 |

24

3-O-*ortho*-carborane, E(B3LYP/aug-cc-pVTZ)= -406.972848

|   |           |           |           |
|---|-----------|-----------|-----------|
| C | 0.000000  | 0.000000  | 0.000000  |
| C | 0.000000  | 0.000000  | 1.556104  |
| B | 2.364818  | 0.000000  | 0.778042  |
| B | 1.204709  | 0.888902  | -0.642609 |
| B | -0.486296 | 1.494004  | -0.646397 |
| B | -1.278800 | 0.830431  | 0.778053  |
| B | 1.204709  | 0.888902  | 2.198713  |
| B | 2.066141  | 1.648372  | 0.778039  |
| B | 0.824005  | 2.542500  | -0.131595 |
| B | -0.716919 | 2.511427  | 0.778030  |
| B | -0.486297 | 1.494005  | 2.202502  |
| B | 0.824005  | 2.542510  | 1.687686  |
| O | 2.975565  | -1.070132 | 0.778039  |
| H | -0.312514 | -0.920110 | 2.026507  |
| H | -1.472020 | 3.426490  | 0.778020  |
| H | 3.163469  | 2.114229  | 0.778043  |
| H | 1.154894  | 3.503312  | -0.746035 |
| H | 1.154914  | 3.503325  | 2.302107  |
| H | 1.678137  | 0.630558  | 3.256295  |
| H | 1.678137  | 0.630558  | -1.700191 |
| H | -1.085872 | 1.552603  | -1.667400 |
| H | -2.377739 | 0.389584  | 0.778049  |
| H | -1.085871 | 1.552604  | 3.223503  |
| H | -0.312498 | -0.920115 | -0.470403 |

24

3-S-*ortho*-carborane, E(B3LYP/aug-cc-pVTZ)= -729.924111

|   |          |          |          |
|---|----------|----------|----------|
| C | 0.000000 | 0.000000 | 0.000000 |
| C | 0.000000 | 0.000000 | 1.553459 |
| B | 2.054834 | 0.000000 | 0.776756 |

|   |           |           |           |
|---|-----------|-----------|-----------|
| B | 1.213602  | 0.940586  | -0.631258 |
| B | -0.506298 | 1.470717  | -0.645569 |
| B | -1.303089 | 0.801999  | 0.776747  |
| B | 1.213601  | 0.940566  | 2.184742  |
| B | 2.017422  | 1.717512  | 0.776747  |
| B | 0.750510  | 2.589049  | -0.119833 |
| B | -0.793929 | 2.491140  | 0.776794  |
| B | -0.506307 | 1.470657  | 2.199087  |
| B | 0.750518  | 2.589049  | 1.673341  |
| S | 2.952172  | -1.441880 | 0.776718  |
| H | -0.249276 | -0.934773 | 2.028219  |
| H | -1.591471 | 3.368101  | 0.776824  |
| H | 3.127333  | 2.135968  | 0.776754  |
| H | 1.030641  | 3.551499  | -0.754938 |
| H | 1.030630  | 3.551487  | 2.308471  |
| H | 1.676890  | 0.700421  | 3.247051  |
| H | 1.676898  | 0.700471  | -1.693571 |
| H | -1.087818 | 1.497368  | -1.676631 |
| H | -2.380048 | 0.313637  | 0.776735  |
| H | -1.087817 | 1.497274  | 3.230155  |
| H | -0.249274 | -0.934765 | -0.474778 |

26

4-NH<sub>2</sub>-*ortho*-carborane, E(B3LYP/aug-cc-pVTZ)= -387.607448

|   |           |          |           |
|---|-----------|----------|-----------|
| C | 0.000000  | 0.000000 | 0.000000  |
| C | 0.000000  | 0.000000 | 1.613963  |
| B | 1.505933  | 0.000000 | 0.784440  |
| B | 1.265196  | 1.022964 | -0.675363 |
| B | -0.467079 | 1.493464 | -0.625242 |
| B | -1.269326 | 0.812954 | 0.806267  |
| B | 1.228312  | 0.986953 | 2.235251  |
| B | 2.010614  | 1.688424 | 0.808802  |
| B | 0.776301  | 2.632405 | -0.071206 |
| B | -0.768624 | 2.501863 | 0.808294  |
| B | -0.482898 | 1.490367 | 2.244895  |

|   |           |           |           |
|---|-----------|-----------|-----------|
| B | 0.773225  | 2.617255  | 1.705904  |
| N | 1.883434  | 0.616718  | -1.922307 |
| H | -0.264748 | -0.929160 | 2.090453  |
| H | -1.586078 | 3.353708  | 0.808698  |
| H | 3.159947  | 1.963829  | 0.814653  |
| H | 1.052307  | 3.588950  | -0.708728 |
| H | 1.055332  | 3.564820  | 2.352146  |
| H | 2.131281  | -0.997637 | 0.777558  |
| H | 1.746310  | 0.659770  | 3.242174  |
| H | -1.071715 | 1.505327  | -1.638549 |
| H | -2.335198 | 0.314717  | 0.799743  |
| H | -1.088040 | 1.496558  | 3.255924  |
| H | -0.263451 | -0.921797 | -0.491819 |
| H | 1.642414  | 1.133326  | -2.752283 |
| H | 2.867663  | 0.404691  | -1.912354 |

26

4-PH<sub>2</sub>-*ortho*-carborane, E(B3LYP/aug-cc-pVTZ)= -674.186305

|   |           |           |           |
|---|-----------|-----------|-----------|
| C | 0.000000  | 0.000000  | 0.000000  |
| C | 0.000000  | 0.000000  | 1.617418  |
| B | 1.514713  | 0.000000  | 0.800544  |
| B | 1.229301  | 0.997851  | -0.644109 |
| B | -0.485866 | 1.489853  | -0.629103 |
| B | -1.278263 | 0.808897  | 0.808319  |
| B | 1.219096  | 0.994554  | 2.241991  |
| B | 2.000681  | 1.691361  | 0.807696  |
| B | 0.765511  | 2.623552  | -0.078395 |
| B | -0.781173 | 2.497643  | 0.806531  |
| B | -0.491732 | 1.491836  | 2.243972  |
| B | 0.761327  | 2.621197  | 1.701225  |
| P | 2.040046  | 0.416491  | -2.326006 |
| H | -0.266615 | -0.929736 | 2.091814  |
| H | -1.598018 | 3.349548  | 0.803039  |
| H | 3.147281  | 1.971754  | 0.808230  |
| H | 1.040846  | 3.575734  | -0.720139 |

|   |           |           |           |
|---|-----------|-----------|-----------|
| H | 1.039360  | 3.573371  | 2.341572  |
| H | 2.134726  | -1.000326 | 0.801077  |
| H | 1.736949  | 0.672588  | 3.250297  |
| H | -1.095297 | 1.497676  | -1.638430 |
| H | -2.338015 | 0.298590  | 0.804329  |
| H | -1.098249 | 1.498044  | 3.254238  |
| H | -0.264619 | -0.927602 | -0.480747 |
| H | 1.912904  | 1.651931  | -3.009093 |
| H | 3.390554  | 0.637431  | -1.954717 |

27

4-CH<sub>3</sub>-*ortho*-carborane, E(B3LYP/aug-cc-pVTZ)= -371.539348

|   |           |           |           |
|---|-----------|-----------|-----------|
| C | 0.000000  | 0.000000  | 0.000000  |
| C | 0.000000  | 0.000000  | 1.624110  |
| B | 1.504317  | 0.000000  | 0.807317  |
| B | 1.229275  | 0.993885  | -0.655758 |
| B | -0.495143 | 1.489062  | -0.619971 |
| B | -1.279876 | 0.806979  | 0.815882  |
| B | 1.217454  | 0.999174  | 2.245589  |
| B | 1.996048  | 1.686880  | 0.804706  |
| B | 0.754804  | 2.617082  | -0.079305 |
| B | -0.788142 | 2.494861  | 0.814186  |
| B | -0.493123 | 1.492114  | 2.250943  |
| B | 0.760957  | 2.621720  | 1.698222  |
| C | 1.940917  | 0.603267  | -2.017083 |
| H | -0.266915 | -0.929192 | 2.099274  |
| H | -1.606707 | 3.345522  | 0.813475  |
| H | 3.143504  | 1.967687  | 0.802361  |
| H | 1.029872  | 3.569335  | -0.722999 |
| H | 1.040238  | 3.575031  | 2.337014  |
| H | 2.130257  | -0.997175 | 0.804940  |
| H | 1.738691  | 0.677460  | 3.252562  |
| H | -1.105055 | 1.494154  | -1.629527 |
| H | -2.339436 | 0.295248  | 0.816132  |
| H | -1.098949 | 1.496795  | 3.261813  |

|   |           |           |           |
|---|-----------|-----------|-----------|
| H | -0.274990 | -0.929004 | -0.472246 |
| H | 2.258624  | 1.503078  | -2.545472 |
| H | 2.830075  | -0.008618 | -1.859630 |
| H | 1.279681  | 0.056367  | -2.692058 |

27

4-SiH<sub>3</sub>-*ortho*-carborane, E(B3LYP/aug-cc-pVTZ)= -622.922011

|    |           |           |           |
|----|-----------|-----------|-----------|
| C  | 0.000000  | 0.000000  | 0.000000  |
| C  | 0.000000  | 0.000000  | 1.622683  |
| B  | 1.511369  | 0.000000  | 0.803372  |
| B  | 1.222925  | 0.993703  | -0.642314 |
| B  | -0.493285 | 1.487896  | -0.626557 |
| B  | -1.279402 | 0.803968  | 0.813406  |
| B  | 1.216789  | 0.997918  | 2.245073  |
| B  | 1.995800  | 1.692917  | 0.807951  |
| B  | 0.755892  | 2.620737  | -0.076815 |
| B  | -0.789396 | 2.494593  | 0.811130  |
| B  | -0.495197 | 1.492268  | 2.249453  |
| B  | 0.756280  | 2.623108  | 1.701603  |
| Si | 2.118352  | 0.495103  | -2.376551 |
| H  | -0.264461 | -0.930740 | 2.096508  |
| H  | -1.608757 | 3.344087  | 0.807442  |
| H  | 3.142248  | 1.974991  | 0.809716  |
| H  | 1.027513  | 3.573923  | -0.719323 |
| H  | 1.032904  | 3.576171  | 2.341356  |
| H  | 2.133315  | -0.999350 | 0.812753  |
| H  | 1.737766  | 0.676107  | 3.251851  |
| H  | -1.111487 | 1.497074  | -1.630759 |
| H  | -2.338227 | 0.291360  | 0.810002  |
| H  | -1.102697 | 1.496138  | 3.259348  |
| H  | -0.271534 | -0.930079 | -0.471876 |
| H  | 1.968016  | 1.570898  | -3.388581 |
| H  | 3.567948  | 0.227249  | -2.191761 |
| H  | 1.501830  | -0.742428 | -2.934528 |

25

4-OH-*ortho*-carborane, E(B3LYP/aug-cc-pVTZ)= -407.495411

|   |           |           |           |
|---|-----------|-----------|-----------|
| C | 0.000000  | 0.000000  | 0.000000  |
| C | 0.000000  | 0.000000  | 1.613132  |
| B | 1.512598  | 0.000000  | 0.809892  |
| B | 1.256452  | 1.007004  | -0.653930 |
| B | -0.484578 | 1.489432  | -0.618489 |
| B | -1.280518 | 0.814806  | 0.810620  |
| B | 1.216137  | 0.996248  | 2.248940  |
| B | 2.009414  | 1.686393  | 0.823298  |
| B | 0.773333  | 2.619859  | -0.078544 |
| B | -0.777910 | 2.499670  | 0.805217  |
| B | -0.491912 | 1.493261  | 2.243590  |
| B | 0.768155  | 2.619997  | 1.700983  |
| O | 1.891887  | 0.599883  | -1.823084 |
| H | -0.268233 | -0.928039 | 2.089712  |
| H | -1.590724 | 3.355667  | 0.801714  |
| H | 3.156460  | 1.965386  | 0.821704  |
| H | 1.053057  | 3.572213  | -0.721915 |
| H | 1.044007  | 3.573706  | 2.340296  |
| H | 2.134411  | -0.998434 | 0.798500  |
| H | 1.725385  | 0.671749  | 3.260872  |
| H | -1.070915 | 1.495944  | -1.642607 |
| H | -2.342033 | 0.307673  | 0.809254  |
| H | -1.098672 | 1.499597  | 3.253417  |
| H | -0.262442 | -0.925602 | -0.485607 |
| H | 1.772582  | 1.202330  | -2.559760 |

25

4-SH-*ortho*-carborane, E(B3LYP/aug-cc-pVTZ)= -730.447683

|   |           |          |           |
|---|-----------|----------|-----------|
| C | 0.000000  | 0.000000 | 0.000000  |
| C | 0.000000  | 0.000000 | 1.619327  |
| B | 1.509543  | 0.000000 | 0.797003  |
| B | 1.232778  | 1.010779 | -0.646390 |
| B | -0.483147 | 1.495940 | -0.626793 |



|   |           |           |           |
|---|-----------|-----------|-----------|
| B | -1.273944 | 0.808033  | 0.808357  |
| B | 1.222853  | 0.992546  | 2.239723  |
| B | 2.003304  | 1.693662  | 0.806789  |
| B | 0.764541  | 2.632606  | -0.072833 |
| B | -0.779726 | 2.499598  | 0.811512  |
| B | -0.489059 | 1.490637  | 2.246522  |
| B | 0.763732  | 2.620987  | 1.704572  |
| S | 2.003244  | 0.569746  | -2.281242 |
| H | -0.264972 | -0.930745 | 2.092804  |
| H | -1.599365 | 3.348604  | 0.811053  |
| H | 3.150642  | 1.970731  | 0.805606  |
| H | 1.041656  | 3.582410  | -0.715796 |
| H | 1.044417  | 3.570097  | 2.348095  |
| H | 2.135369  | -0.996100 | 0.790599  |
| H | 1.744343  | 0.668612  | 3.245442  |
| H | -1.088908 | 1.501886  | -1.637750 |
| H | -2.335720 | 0.302156  | 0.802078  |
| H | -1.094958 | 1.495626  | 3.256892  |
| H | -0.261089 | -0.924024 | -0.488804 |
| H | 3.156730  | 0.082088  | -1.792001 |

24

4-Cl-*ortho*-carborane, E(B3LYP/aug-cc-pVTZ)= -791.869593

|   |           |          |           |
|---|-----------|----------|-----------|
| C | 0.000000  | 0.000000 | 0.000000  |
| C | 0.000000  | 0.000000 | 1.621085  |
| B | 1.511884  | 0.000000 | 0.818871  |
| B | 1.222788  | 1.003302 | -0.629090 |
| B | -0.496978 | 1.495104 | -0.622910 |
| B | -1.280543 | 0.806901 | 0.809867  |
| B | 1.213831  | 1.000712 | 2.250524  |
| B | 2.001401  | 1.691978 | 0.815769  |
| B | 0.758335  | 2.626022 | -0.078664 |
| B | -0.788717 | 2.496604 | 0.810720  |
| B | -0.496642 | 1.491743 | 2.246662  |
| B | 0.758399  | 2.623690 | 1.699995  |

|    |           |           |           |
|----|-----------|-----------|-----------|
| Cl | 2.030912  | 0.544547  | -2.164377 |
| H  | -0.267290 | -0.930006 | 2.094611  |
| H  | -1.606596 | 3.347051  | 0.808376  |
| H  | 3.147268  | 1.970915  | 0.806583  |
| H  | 1.038530  | 3.572654  | -0.724840 |
| H  | 1.035307  | 3.577135  | 2.338367  |
| H  | 2.137498  | -0.994929 | 0.803304  |
| H  | 1.729803  | 0.679828  | 3.259773  |
| H  | -1.087883 | 1.495987  | -1.641339 |
| H  | -2.338825 | 0.294026  | 0.806173  |
| H  | -1.104796 | 1.496541  | 3.255392  |
| H  | -0.258670 | -0.926390 | -0.485853 |

24

4-O-*ortho*-carborane, E(B3LYP/aug-cc-pVTZ)= -406.943299

|   |           |           |           |
|---|-----------|-----------|-----------|
| C | 0.000000  | 0.000000  | 0.000000  |
| C | 0.000000  | 0.000000  | 1.623289  |
| B | 1.481580  | 0.000000  | 0.692636  |
| B | 1.661485  | 1.385675  | -0.943571 |
| B | -0.419579 | 1.475388  | -0.622567 |
| B | -1.254052 | 0.836191  | 0.818585  |
| B | 1.242957  | 0.948904  | 2.196505  |
| B | 2.069613  | 1.657440  | 0.796653  |
| B | 0.798254  | 2.664334  | -0.097315 |
| B | -0.736636 | 2.491576  | 0.799105  |
| B | -0.442369 | 1.506731  | 2.245279  |
| B | 0.839460  | 2.596863  | 1.676574  |
| O | 2.201145  | 1.047325  | -2.016614 |
| H | -0.274151 | -0.915592 | 2.121290  |
| H | -1.521183 | 3.382145  | 0.820888  |
| H | 3.210355  | 1.960502  | 0.934190  |
| H | 1.021042  | 3.708066  | -0.621660 |
| H | 1.131454  | 3.543759  | 2.331133  |
| H | 2.097141  | -1.013012 | 0.738922  |
| H | 1.786790  | 0.638993  | 3.202508  |

|   |           |           |           |
|---|-----------|-----------|-----------|
| H | -1.070803 | 1.515297  | -1.614262 |
| H | -2.341008 | 0.368644  | 0.840489  |
| H | -1.023521 | 1.554114  | 3.275284  |
| H | -0.337315 | -0.922454 | -0.448170 |

24

4-S'-*ortho*-carborane, E(B3LYP/aug-cc-pVTZ)= -729.906742

|   |           |           |           |
|---|-----------|-----------|-----------|
| C | 0.000000  | 0.000000  | 0.000000  |
| C | 0.000000  | 0.000000  | 1.631191  |
| B | 1.494712  | 0.000000  | 0.752121  |
| B | 1.317264  | 1.035378  | -0.775414 |
| B | -0.482615 | 1.483091  | -0.612156 |
| B | -1.270826 | 0.811212  | 0.832237  |
| B | 1.227840  | 0.979603  | 2.223692  |
| B | 2.007199  | 1.678274  | 0.789487  |
| B | 0.760828  | 2.621367  | -0.085704 |
| B | -0.774832 | 2.488979  | 0.826816  |
| B | -0.478233 | 1.486835  | 2.263809  |
| B | 0.782597  | 2.605865  | 1.695409  |
| S | 2.082608  | 0.549753  | -2.286625 |
| H | -0.255021 | -0.930953 | 2.109653  |
| H | -1.591734 | 3.348273  | 0.840254  |
| H | 3.153549  | 1.969011  | 0.829954  |
| H | 1.007024  | 3.609597  | -0.689560 |
| H | 1.069512  | 3.558367  | 2.342066  |
| H | 2.114883  | -1.002184 | 0.785041  |
| H | 1.765552  | 0.658598  | 3.227775  |
| H | -1.133153 | 1.511867  | -1.597059 |
| H | -2.341910 | 0.313234  | 0.842015  |
| H | -1.071059 | 1.501206  | 3.287309  |
| H | -0.277251 | -0.923195 | -0.481508 |

26

8-NH<sub>2</sub>-*ortho*-carborane, E(B3LYP/aug-cc-pVTZ)= -387.602118

|   |          |          |          |
|---|----------|----------|----------|
| C | 0.000000 | 0.000000 | 0.000000 |
|---|----------|----------|----------|

|   |           |           |           |
|---|-----------|-----------|-----------|
| C | 0.000000  | 0.000000  | 1.630271  |
| B | 1.510736  | 0.000000  | 0.807035  |
| B | 1.197140  | 1.000080  | -0.634514 |
| B | -0.517569 | 1.490777  | -0.616310 |
| B | -1.278580 | 0.801580  | 0.827191  |
| B | 1.219651  | 0.984507  | 2.243946  |
| B | 2.039042  | 1.701657  | 0.793919  |
| B | 0.739323  | 2.618262  | -0.088869 |
| B | -0.784736 | 2.495214  | 0.818670  |
| B | -0.479711 | 1.490276  | 2.255396  |
| B | 0.776492  | 2.611372  | 1.691095  |
| N | 3.459839  | 2.044447  | 0.826152  |
| H | -0.272260 | -0.929251 | -0.471567 |
| H | -1.602066 | 3.347041  | 0.834464  |
| H | 1.061840  | 3.565306  | 2.329185  |
| H | 1.019545  | 3.571771  | -0.728518 |
| H | -2.337433 | 0.289301  | 0.834626  |
| H | -1.135515 | 1.491313  | -1.620145 |
| H | -1.081466 | 1.503826  | 3.268718  |
| H | 1.754094  | 0.669685  | 3.245647  |
| H | 2.135169  | -0.997914 | 0.796014  |
| H | 1.712033  | 0.679073  | -1.646508 |
| H | -0.264683 | -0.931646 | 2.101676  |
| H | 3.693855  | 3.009130  | 0.996213  |
| H | 4.056898  | 1.665174  | 0.109420  |

26

8-PH<sub>2</sub>-*ortho*-carborane, E(B3LYP/aug-cc-pVTZ)= -674.185284

|   |           |          |           |
|---|-----------|----------|-----------|
| C | 0.000000  | 0.000000 | 0.000000  |
| C | 0.000000  | 0.000000 | 1.624649  |
| B | 1.512790  | 0.000000 | 0.814076  |
| B | 1.214884  | 0.994052 | -0.622360 |
| B | -0.491279 | 1.492653 | -0.625250 |
| B | -1.278170 | 0.806746 | 0.808829  |
| B | 1.213070  | 0.998379 | 2.253450  |

|   |           |           |           |
|---|-----------|-----------|-----------|
| B | 2.015580  | 1.690393  | 0.817466  |
| B | 0.767377  | 2.617989  | -0.074689 |
| B | -0.782439 | 2.497386  | 0.811484  |
| B | -0.499066 | 1.491465  | 2.247502  |
| B | 0.759491  | 2.619759  | 1.705413  |
| P | 3.921215  | 2.150676  | 0.714732  |
| H | -0.266388 | -0.929739 | -0.474513 |
| H | -1.597587 | 3.350865  | 0.808559  |
| H | 1.036698  | 3.572740  | 2.344816  |
| H | 1.047335  | 3.570077  | -0.715347 |
| H | -2.338164 | 0.296722  | 0.807303  |
| H | -1.096211 | 1.501137  | -1.636307 |
| H | -1.107849 | 1.498126  | 3.256416  |
| H | 1.730674  | 0.675030  | 3.261507  |
| H | 2.135827  | -0.998260 | 0.815607  |
| H | 1.739753  | 0.675356  | -1.627829 |
| H | -0.268873 | -0.929339 | 2.098599  |
| H | 3.816003  | 3.440159  | 1.297524  |
| H | 4.326890  | 1.535050  | 1.929262  |

27

8-CH<sub>3</sub>-*ortho*-carborane, E(B3LYP/aug-cc-pVTZ)= -371.537684

|   |           |          |           |
|---|-----------|----------|-----------|
| C | 0.000000  | 0.000000 | 0.000000  |
| C | 0.000000  | 0.000000 | 1.622647  |
| B | 1.511706  | 0.000000 | 0.811011  |
| B | 1.215667  | 0.994713 | -0.621916 |
| B | -0.492942 | 1.492734 | -0.624727 |
| B | -1.278709 | 0.806586 | 0.811255  |
| B | 1.215727  | 0.994990 | 2.245472  |
| B | 2.031988  | 1.696084 | 0.811704  |
| B | 0.763341  | 2.617712 | -0.076085 |
| B | -0.783002 | 2.495345 | 0.811810  |
| B | -0.493509 | 1.491525 | 2.248103  |
| B | 0.762171  | 2.617122 | 1.700370  |
| C | 3.573089  | 2.092957 | 0.811502  |

|   |           |           |           |
|---|-----------|-----------|-----------|
| H | -0.269009 | -0.928996 | -0.474271 |
| H | -1.599809 | 3.347830  | 0.811691  |
| H | 1.041879  | 3.570022  | 2.340953  |
| H | 1.041647  | 3.570764  | -0.717196 |
| H | -2.338162 | 0.295050  | 0.811010  |
| H | -1.100386 | 1.499204  | -1.634746 |
| H | -1.101429 | 1.496863  | 3.257845  |
| H | 1.734958  | 0.673406  | 3.254418  |
| H | 2.133291  | -0.999967 | 0.811975  |
| H | 1.735358  | 0.675277  | -1.631262 |
| H | -0.268457 | -0.929273 | 2.096721  |
| H | 3.709805  | 3.139368  | 1.087514  |
| H | 4.152997  | 1.496028  | 1.517811  |
| H | 4.027365  | 1.959387  | -0.171866 |

27

8-SiH<sub>3</sub>-*ortho*-carborane, E(B3LYP/aug-cc-pVTZ)= -622.922472

|    |           |           |           |
|----|-----------|-----------|-----------|
| C  | 0.000000  | 0.000000  | 0.000000  |
| C  | 0.000000  | 0.000000  | 1.619334  |
| B  | 1.515019  | 0.000000  | 0.809913  |
| B  | 1.217876  | 0.996183  | -0.625561 |
| B  | -0.492717 | 1.491673  | -0.627187 |
| B  | -1.280089 | 0.808839  | 0.809754  |
| B  | 1.217786  | 0.996329  | 2.244519  |
| B  | 2.017303  | 1.689427  | 0.809461  |
| B  | 0.762511  | 2.620639  | -0.080046 |
| B  | -0.783581 | 2.496237  | 0.809368  |
| B  | -0.492577 | 1.492569  | 2.246087  |
| B  | 0.763464  | 2.621294  | 1.697934  |
| Si | 3.969668  | 2.188724  | 0.813572  |
| H  | -0.267413 | -0.929091 | -0.475478 |
| H  | -1.599064 | 3.349620  | 0.809375  |
| H  | 1.036433  | 3.574118  | 2.340460  |
| H  | 1.036102  | 3.573148  | -0.722161 |
| H  | -2.339507 | 0.297121  | 0.809808  |

|   |           |           |           |
|---|-----------|-----------|-----------|
| H | -1.097733 | 1.497840  | -1.638379 |
| H | -1.097401 | 1.499386  | 3.257377  |
| H | 1.730867  | 0.674934  | 3.256049  |
| H | 2.132909  | -1.001347 | 0.809331  |
| H | 1.730640  | 0.673582  | -1.637008 |
| H | -0.267570 | -0.928935 | 2.094986  |
| H | 4.404785  | 2.665707  | 2.153945  |
| H | 4.833577  | 1.028639  | 0.456741  |
| H | 4.256026  | 3.271120  | -0.164998 |

25

8-OH-*ortho*-carborane, E(B3LYP/aug-cc-pVTZ)= -407.492442

|   |           |           |           |
|---|-----------|-----------|-----------|
| C | 0.000000  | 0.000000  | 0.000000  |
| C | 0.000000  | 0.000000  | 1.628486  |
| B | 1.512380  | 0.000000  | 0.814221  |
| B | 1.203993  | 0.989745  | -0.627717 |
| B | -0.502867 | 1.488050  | -0.621925 |
| B | -1.281450 | 0.800055  | 0.814278  |
| B | 1.204011  | 0.989690  | 2.256195  |
| B | 2.026460  | 1.703693  | 0.814237  |
| B | 0.751693  | 2.614467  | -0.077851 |
| B | -0.788634 | 2.493118  | 0.814259  |
| B | -0.502837 | 1.488048  | 2.250438  |
| B | 0.751736  | 2.614414  | 1.706356  |
| O | 3.397451  | 1.994001  | 0.814187  |
| H | -0.267903 | -0.931161 | -0.470489 |
| H | -1.606257 | 3.344728  | 0.814281  |
| H | 1.037826  | 3.569167  | 2.342892  |
| H | 1.037763  | 3.569232  | -0.714370 |
| H | -2.338352 | 0.284221  | 0.814271  |
| H | -1.113204 | 1.494488  | -1.630058 |
| H | -1.113153 | 1.494482  | 3.258584  |
| H | 1.730884  | 0.675453  | 3.262297  |
| H | 2.139052  | -0.995488 | 0.814234  |
| H | 1.730830  | 0.675485  | -1.633833 |

|   |           |           |          |
|---|-----------|-----------|----------|
| H | -0.267887 | -0.931166 | 2.098975 |
| H | 3.591919  | 2.932869  | 0.814731 |

25

8-SH-*ortho*-carborane, E(B3LYP/aug-cc-pVTZ)= -730.446733

|   |           |           |           |
|---|-----------|-----------|-----------|
| C | 0.000000  | 0.000000  | 0.000000  |
| C | 0.000000  | 0.000000  | 1.629188  |
| B | 1.511849  | 0.000000  | 0.812553  |
| B | 1.206476  | 0.995957  | -0.629731 |
| B | -0.502280 | 1.490947  | -0.621222 |
| B | -1.278453 | 0.803372  | 0.816759  |
| B | 1.211157  | 0.993369  | 2.255047  |
| B | 2.011931  | 1.692222  | 0.810761  |
| B | 0.757533  | 2.617230  | -0.079158 |
| B | -0.782508 | 2.496581  | 0.815621  |
| B | -0.495822 | 1.489889  | 2.251994  |
| B | 0.763516  | 2.616067  | 1.704593  |
| S | 3.841426  | 2.085628  | 0.799827  |
| H | -0.267484 | -0.930560 | -0.472159 |
| H | -1.596550 | 3.350939  | 0.818025  |
| H | 1.047402  | 3.568971  | 2.341613  |
| H | 1.039319  | 3.569697  | -0.717247 |
| H | -2.337778 | 0.292515  | 0.818322  |
| H | -1.112084 | 1.498399  | -1.629296 |
| H | -1.102597 | 1.499703  | 3.261908  |
| H | 1.740599  | 0.674917  | 3.257370  |
| H | 2.140237  | -0.994213 | 0.811620  |
| H | 1.732259  | 0.677206  | -1.633975 |
| H | -0.265597 | -0.930781 | 2.101992  |
| H | 3.710292  | 3.414710  | 0.946522  |

24

8-Cl-*ortho*-carborane, E(B3LYP/aug-cc-pVTZ)= -791.869813

|   |          |          |          |
|---|----------|----------|----------|
| C | 0.000000 | 0.000000 | 0.000000 |
| C | 0.000000 | 0.000000 | 1.624388 |



|    |           |           |           |
|----|-----------|-----------|-----------|
| B  | 1.508684  | 0.000000  | 0.812181  |
| B  | 1.208647  | 0.998601  | -0.627873 |
| B  | -0.500460 | 1.490700  | -0.624965 |
| B  | -1.281539 | 0.801261  | 0.812210  |
| B  | 1.208639  | 0.998594  | 2.252257  |
| B  | 1.995860  | 1.699930  | 0.812209  |
| B  | 0.747983  | 2.625900  | -0.079213 |
| B  | -0.794327 | 2.492698  | 0.812197  |
| B  | -0.500458 | 1.490695  | 2.249383  |
| B  | 0.747991  | 2.625882  | 1.703641  |
| Cl | 3.746278  | 2.137963  | 0.812211  |
| H  | -0.264573 | -0.930024 | -0.474822 |
| H  | -1.613674 | 3.341806  | 0.812188  |
| H  | 1.033687  | 3.576342  | 2.341281  |
| H  | 1.033679  | 3.576361  | -0.716853 |
| H  | -2.338287 | 0.285637  | 0.812198  |
| H  | -1.107498 | 1.494962  | -1.634522 |
| H  | -1.107491 | 1.494941  | 3.258944  |
| H  | 1.740408  | 0.684561  | 3.254688  |
| H  | 2.146178  | -0.987531 | 0.812195  |
| H  | 1.740391  | 0.684560  | -1.630315 |
| H  | -0.264573 | -0.930024 | 2.099210  |

24

8-O-*ortho*-carborane, E(B3LYP/aug-cc-pVTZ)= -406.915862

|   |           |          |           |
|---|-----------|----------|-----------|
| C | 0.000000  | 0.000000 | 0.000000  |
| C | 0.000000  | 0.000000 | 1.627533  |
| B | 1.527409  | 0.000000 | 0.813753  |
| B | 1.225365  | 0.979422 | -0.617228 |
| B | -0.481795 | 1.489887 | -0.617405 |
| B | -1.276331 | 0.795745 | 0.813776  |
| B | 1.225373  | 0.979429 | 2.244733  |
| B | 2.212405  | 1.761865 | 0.813750  |
| B | 0.770406  | 2.613683 | -0.075052 |
| B | -0.773716 | 2.488971 | 0.813772  |

|   |           |           |           |
|---|-----------|-----------|-----------|
| B | -0.481769 | 1.489896  | 2.244938  |
| B | 0.770421  | 2.613664  | 1.702587  |
| O | 3.460806  | 2.061938  | 0.813741  |
| H | -0.274015 | -0.930063 | -0.469156 |
| H | -1.601706 | 3.339695  | 0.813781  |
| H | 1.005448  | 3.572685  | 2.361025  |
| H | 1.005413  | 3.572708  | -0.733490 |
| H | -2.341605 | 0.285574  | 0.813774  |
| H | -1.099862 | 1.495348  | -1.628251 |
| H | -1.099836 | 1.495368  | 3.255784  |
| H | 1.700135  | 0.643921  | 3.276960  |
| H | 2.102423  | -1.034196 | 0.813745  |
| H | 1.700113  | 0.643903  | -1.649458 |
| H | -0.273999 | -0.930069 | 2.096689  |

24

8-*S*-*ortho*-carborane, E(B3LYP/aug-cc-pVTZ)= -729.891955

|   |           |           |           |
|---|-----------|-----------|-----------|
| C | 0.000000  | 0.000000  | 0.000000  |
| C | 0.000000  | 0.000000  | 1.617349  |
| B | 1.536821  | 0.000000  | 0.808663  |
| B | 1.233912  | 0.982076  | -0.619930 |
| B | -0.476605 | 1.489250  | -0.621814 |
| B | -1.276948 | 0.804340  | 0.808666  |
| B | 1.233938  | 0.982088  | 2.237255  |
| B | 2.146312  | 1.705866  | 0.808655  |
| B | 0.786365  | 2.609260  | -0.076992 |
| B | -0.764672 | 2.490855  | 0.808631  |
| B | -0.476588 | 1.489270  | 2.239140  |
| B | 0.786404  | 2.609257  | 1.694339  |
| S | 3.886220  | 2.092130  | 0.808649  |
| H | -0.268680 | -0.929797 | 2.090044  |
| H | -1.582465 | 3.349444  | 0.808617  |
| H | 1.036635  | 3.564774  | -0.728983 |
| H | 1.036676  | 3.564768  | 2.346333  |
| H | 2.116090  | -1.027658 | 0.808667  |

|   |           |           |           |
|---|-----------|-----------|-----------|
| H | 1.717847  | 0.646997  | 3.261622  |
| H | 1.717811  | 0.646951  | -1.644292 |
| H | -1.086497 | 1.498432  | -1.635974 |
| H | -2.343251 | 0.297696  | 0.808670  |
| H | -1.086476 | 1.498465  | 3.253303  |
| H | -0.268669 | -0.929806 | -0.472684 |

26

9-NH<sub>2</sub>-*ortho*-carborane, E(B3LYP/aug-cc-pVTZ)= -387.602931

|   |           |           |           |
|---|-----------|-----------|-----------|
| C | 0.000000  | 0.000000  | 0.000000  |
| C | 0.000000  | 0.000000  | 1.628312  |
| B | 1.509011  | 0.000000  | 0.819736  |
| B | 1.210673  | 0.987255  | -0.625986 |
| B | -0.503592 | 1.487250  | -0.621555 |
| B | -1.284817 | 0.799863  | 0.822451  |
| B | 1.218085  | 1.013945  | 2.239331  |
| B | 1.992850  | 1.686937  | 0.800084  |
| B | 0.755695  | 2.654501  | -0.115171 |
| B | -0.809539 | 2.482808  | 0.814617  |
| B | -0.501399 | 1.494259  | 2.245276  |
| B | 0.745638  | 2.630145  | 1.675357  |
| N | 1.134803  | 3.809483  | -0.923784 |
| H | -0.263593 | -0.927971 | 2.106576  |
| H | -1.626391 | 3.336018  | 0.805771  |
| H | 3.136079  | 1.980617  | 0.791731  |
| H | 1.020217  | 3.590316  | 2.309205  |
| H | 2.132997  | -0.997733 | 0.820620  |
| H | 1.735079  | 0.708978  | 3.253726  |
| H | 1.722557  | 0.666952  | -1.638353 |
| H | -1.115583 | 1.488228  | -1.630632 |
| H | -2.339696 | 0.278100  | 0.819193  |
| H | -1.095457 | 1.505155  | 3.263448  |
| H | -0.270410 | -0.929801 | -0.471511 |
| H | 1.323049  | 4.674213  | -0.443451 |
| H | 0.627700  | 3.984538  | -1.775772 |

26

9-PH<sub>2</sub>-*ortho*-carborane, E(B3LYP/aug-cc-pVTZ)= -674.185641

|   |           |           |           |
|---|-----------|-----------|-----------|
| C | 0.000000  | 0.000000  | 0.000000  |
| C | 0.000000  | 0.000000  | 1.622576  |
| B | 1.513614  | 0.000000  | 0.811320  |
| B | 1.215197  | 0.999489  | -0.625635 |
| B | -0.496287 | 1.487817  | -0.624113 |
| B | -1.278988 | 0.805547  | 0.813363  |
| B | 1.216554  | 0.995844  | 2.247232  |
| B | 2.000724  | 1.689324  | 0.811761  |
| B | 0.764027  | 2.632875  | -0.089779 |
| B | -0.784917 | 2.495538  | 0.807257  |
| B | -0.492106 | 1.496221  | 2.246381  |
| B | 0.763171  | 2.622239  | 1.696104  |
| P | 1.124347  | 4.209122  | -1.202555 |
| H | -0.268258 | -0.928550 | 2.098039  |
| H | -1.602427 | 3.347149  | 0.803964  |
| H | 3.146757  | 1.970875  | 0.809790  |
| H | 1.038420  | 3.576220  | 2.335149  |
| H | 2.136640  | -0.997875 | 0.809043  |
| H | 1.733571  | 0.678798  | 3.257611  |
| H | 1.732043  | 0.679566  | -1.635548 |
| H | -1.101284 | 1.496976  | -1.635071 |
| H | -2.339273 | 0.296177  | 0.813910  |
| H | -1.100298 | 1.505896  | 3.255572  |
| H | -0.267394 | -0.929084 | -0.475283 |
| H | 1.576175  | 5.059976  | -0.159983 |
| H | 2.438931  | 3.852157  | -1.605418 |

27

9-CH<sub>3</sub>-*ortho*-carborane, E(B3LYP/aug-cc-pVTZ)= -371.538091

|   |          |          |          |
|---|----------|----------|----------|
| C | 0.000000 | 0.000000 | 0.000000 |
| C | 0.000000 | 0.000000 | 1.623471 |
| B | 1.511794 | 0.000000 | 0.811495 |

|   |           |           |           |
|---|-----------|-----------|-----------|
| B | 1.213863  | 0.998205  | -0.625705 |
| B | -0.491767 | 1.492590  | -0.625701 |
| B | -1.277429 | 0.808520  | 0.811478  |
| B | 1.216638  | 1.000380  | 2.245733  |
| B | 1.995953  | 1.690216  | 0.807798  |
| B | 0.767771  | 2.648315  | -0.099392 |
| B | -0.782502 | 2.495625  | 0.807727  |
| B | -0.493044 | 1.495982  | 2.245701  |
| B | 0.759674  | 2.620618  | 1.692874  |
| C | 1.140634  | 3.935584  | -0.956502 |
| H | -0.269023 | -0.928139 | 2.099100  |
| H | -1.601148 | 3.347455  | 0.805817  |
| H | 3.143288  | 1.972033  | 0.805891  |
| H | 1.036517  | 3.575940  | 2.331252  |
| H | 2.135573  | -0.997732 | 0.810719  |
| H | 1.734953  | 0.682654  | 3.255536  |
| H | 1.733031  | 0.676138  | -1.634518 |
| H | -1.102601 | 1.498240  | -1.634571 |
| H | -2.338134 | 0.299135  | 0.810640  |
| H | -1.100968 | 1.504726  | 3.255482  |
| H | -0.269199 | -0.928773 | -0.474769 |
| H | 1.383923  | 4.782712  | -0.313300 |
| H | 2.005556  | 3.761087  | -1.599125 |
| H | 0.317755  | 4.248068  | -1.602037 |

27

9-SiH<sub>3</sub>-*ortho*-carborane, E(B3LYP/aug-cc-pVTZ)= -622.922488

|   |           |          |           |
|---|-----------|----------|-----------|
| C | 0.000000  | 0.000000 | 0.000000  |
| C | 0.000000  | 0.000000 | 1.622772  |
| B | 1.511872  | 0.000000 | 0.810863  |
| B | 1.215212  | 1.000853 | -0.625189 |
| B | -0.494235 | 1.495042 | -0.625280 |
| B | -1.279074 | 0.806412 | 0.810761  |
| B | 1.215117  | 0.999246 | 2.248098  |
| B | 1.996462  | 1.692793 | 0.810383  |

|    |           |           |           |
|----|-----------|-----------|-----------|
| B  | 0.761133  | 2.635147  | -0.087574 |
| B  | -0.786451 | 2.496732  | 0.810761  |
| B  | -0.495256 | 1.493056  | 2.248130  |
| B  | 0.757126  | 2.621755  | 1.699413  |
| Si | 1.235831  | 4.265086  | -1.172753 |
| H  | -0.268383 | -0.928801 | 2.098245  |
| H  | -1.608396 | 3.344420  | 0.813693  |
| H  | 3.143905  | 1.971741  | 0.813753  |
| H  | 1.032438  | 3.573459  | 2.342078  |
| H  | 2.137251  | -0.996384 | 0.809406  |
| H  | 1.733901  | 0.680761  | 3.257072  |
| H  | 1.732295  | 0.678398  | -1.634033 |
| H  | -1.104147 | 1.497427  | -1.633950 |
| H  | -2.339375 | 0.296863  | 0.809126  |
| H  | -1.103859 | 1.500059  | 3.257164  |
| H  | -0.268287 | -0.928164 | -0.476856 |
| H  | 1.713662  | 5.376963  | -0.307906 |
| H  | 2.315075  | 3.972394  | -2.156174 |
| H  | 0.067042  | 4.771385  | -1.943600 |

25

9-OH-*ortho*-carborane, E(B3LYP/aug-cc-pVTZ)= -407.493354

|   |           |          |           |
|---|-----------|----------|-----------|
| C | 0.000000  | 0.000000 | 0.000000  |
| C | 0.000000  | 0.000000 | 1.627230  |
| B | 1.511181  | 0.000000 | 0.817911  |
| B | 1.212644  | 0.991795 | -0.626871 |
| B | -0.504717 | 1.483020 | -0.626894 |
| B | -1.282675 | 0.799110 | 0.817736  |
| B | 1.215795  | 1.006079 | 2.243960  |
| B | 1.995377  | 1.683471 | 0.808688  |
| B | 0.757476  | 2.648030 | -0.104654 |
| B | -0.803373 | 2.483997 | 0.808602  |
| B | -0.499941 | 1.496771 | 2.243854  |
| B | 0.750345  | 2.623318 | 1.683284  |
| O | 1.071028  | 3.743782 | -0.919456 |

|   |           |           |           |
|---|-----------|-----------|-----------|
| H | -0.265488 | -0.927883 | 2.104703  |
| H | -1.615563 | 3.341209  | 0.800933  |
| H | 3.138022  | 1.981489  | 0.801236  |
| H | 1.025788  | 3.586323  | 2.313597  |
| H | 2.133327  | -0.998601 | 0.817454  |
| H | 1.730270  | 0.698702  | 3.258813  |
| H | 1.730168  | 0.674794  | -1.636812 |
| H | -1.111506 | 1.487538  | -1.636891 |
| H | -2.338709 | 0.280399  | 0.817454  |
| H | -1.099155 | 1.508130  | 3.258700  |
| H | -0.266143 | -0.930664 | -0.472404 |
| H | 1.295362  | 4.537772  | -0.430819 |

25

9-SH-*ortho*-carborane, E(B3LYP/aug-cc-pVTZ)= -730.447387

|   |           |           |           |
|---|-----------|-----------|-----------|
| C | 0.000000  | 0.000000  | 0.000000  |
| C | 0.000000  | 0.000000  | 1.626008  |
| B | 1.511811  | 0.000000  | 0.818115  |
| B | 1.213322  | 0.994154  | -0.624315 |
| B | -0.505610 | 1.484541  | -0.624253 |
| B | -1.283047 | 0.797602  | 0.817578  |
| B | 1.214134  | 1.005633  | 2.244824  |
| B | 1.995983  | 1.687925  | 0.809708  |
| B | 0.751504  | 2.630764  | -0.093558 |
| B | -0.803813 | 2.487516  | 0.808151  |
| B | -0.501245 | 1.496068  | 2.244120  |
| B | 0.750073  | 2.628376  | 1.686313  |
| S | 1.170679  | 4.096033  | -1.178961 |
| H | -0.265467 | -0.928238 | 2.103311  |
| H | -1.618263 | 3.340473  | 0.799097  |
| H | 3.138078  | 1.981908  | 0.801494  |
| H | 1.023616  | 3.587602  | 2.319007  |
| H | 2.136651  | -0.996540 | 0.816905  |
| H | 1.730077  | 0.697813  | 3.258376  |
| H | 1.729119  | 0.679855  | -1.635533 |

|   |           |           |           |
|---|-----------|-----------|-----------|
| H | -1.109586 | 1.490151  | -1.635465 |
| H | -2.339870 | 0.281196  | 0.816437  |
| H | -1.102659 | 1.507481  | 3.257276  |
| H | -0.265330 | -0.930030 | -0.474257 |
| H | 1.390348  | 4.970098  | -0.182003 |

24

9-Cl-*ortho*-carborane, E(B3LYP/aug-cc-pVTZ)= -791.870991

|    |           |           |           |
|----|-----------|-----------|-----------|
| C  | 0.000000  | 0.000000  | 0.000000  |
| C  | 0.000000  | 0.000000  | 1.622834  |
| B  | 1.512288  | 0.000000  | 0.812820  |
| B  | 1.215281  | 0.993422  | -0.626893 |
| B  | -0.499952 | 1.487897  | -0.626892 |
| B  | -1.280212 | 0.805038  | 0.812822  |
| B  | 1.215227  | 1.001186  | 2.246203  |
| B  | 1.998736  | 1.688763  | 0.811413  |
| B  | 0.756564  | 2.624498  | -0.080365 |
| B  | -0.793068 | 2.493585  | 0.811458  |
| B  | -0.495776 | 1.494449  | 2.246206  |
| B  | 0.756475  | 2.624000  | 1.699874  |
| Cl | 1.176228  | 4.080327  | -1.063868 |
| H  | -0.267586 | -0.928230 | 2.098934  |
| H  | -1.602651 | 3.350923  | 0.801117  |
| H  | 3.140460  | 1.983581  | 0.801033  |
| H  | 1.033013  | 3.583257  | 2.328390  |
| H  | 2.136280  | -0.996870 | 0.811805  |
| H  | 1.733032  | 0.686074  | 3.256362  |
| H  | 1.732238  | 0.686217  | -1.639007 |
| H  | -1.101108 | 1.503028  | -1.639004 |
| H  | -2.339105 | 0.293313  | 0.811781  |
| H  | -1.101843 | 1.503319  | 3.256373  |
| H  | -0.267661 | -0.928428 | -0.476350 |

24

9-O-*ortho*-carborane, E(B3LYP/aug-cc-pVTZ)= -406.914490



|   |           |           |           |
|---|-----------|-----------|-----------|
| C | 0.000000  | 0.000000  | 0.000000  |
| C | 0.000000  | 0.000000  | 1.626881  |
| B | 1.512910  | 0.000000  | 0.804822  |
| B | 1.218037  | 0.985714  | -0.645135 |
| B | -0.471314 | 1.494363  | -0.645137 |
| B | -1.261406 | 0.835318  | 0.804822  |
| B | 1.232807  | 1.005775  | 2.225451  |
| B | 2.017564  | 1.671840  | 0.789315  |
| B | 0.842289  | 2.797498  | -0.211007 |
| B | -0.759107 | 2.507870  | 0.789283  |
| B | -0.472552 | 1.519243  | 2.225452  |
| B | 0.791688  | 2.629406  | 1.666626  |
| O | 1.149633  | 3.818227  | -0.925169 |
| H | -0.280796 | -0.932570 | -0.461621 |
| H | 3.179976  | 1.909189  | 0.808211  |
| H | -1.597231 | 3.347566  | 0.808174  |
| H | 1.073050  | 3.563855  | 2.343003  |
| H | -2.328766 | 0.324805  | 0.810457  |
| H | -1.114089 | 1.455965  | -1.640120 |
| H | -1.074145 | 1.536178  | 3.246771  |
| H | 1.743742  | 0.687740  | 3.246769  |
| H | 2.120957  | -1.014967 | 0.810442  |
| H | 1.732770  | 0.598797  | -1.640108 |
| H | -0.277585 | -0.921906 | 2.107120  |

24

9-*S*-*ortho*-carborane, E(B3LYP/aug-cc-pVTZ)= -729.889871

|   |           |          |           |
|---|-----------|----------|-----------|
| C | 0.000000  | 0.000000 | 0.000000  |
| C | 0.000000  | 0.000000 | 1.627585  |
| B | 1.508973  | 0.000000 | 0.802576  |
| B | 1.218933  | 0.994030 | -0.645429 |
| B | -0.473444 | 1.499929 | -0.645424 |
| B | -1.261417 | 0.828138 | 0.802571  |
| B | 1.228988  | 1.005885 | 2.225032  |
| B | 2.011066  | 1.680779 | 0.784882  |

|   |           |           |           |
|---|-----------|-----------|-----------|
| B | 0.814206  | 2.723878  | -0.185141 |
| B | -0.758738 | 2.508741  | 0.784862  |
| B | -0.475310 | 1.515355  | 2.225036  |
| B | 0.786530  | 2.631129  | 1.659610  |
| S | 1.234723  | 4.130710  | -1.189625 |
| H | -0.277947 | -0.929807 | -0.468742 |
| H | 3.168073  | 1.928858  | 0.798347  |
| H | -1.589796 | 3.351090  | 0.798327  |
| H | 1.067498  | 3.571050  | 2.322867  |
| H | -2.329800 | 0.322964  | 0.805729  |
| H | -1.104496 | 1.469161  | -1.644147 |
| H | -1.079390 | 1.536226  | 3.243139  |
| H | 1.745429  | 0.691794  | 3.243128  |
| H | 2.124840  | -1.008637 | 0.805737  |
| H | 1.729570  | 0.621984  | -1.644154 |
| H | -0.275819 | -0.922672 | 2.108149  |

26

1-NH<sub>2</sub>-*meta*-carborane, E(B3LYP/aug-cc-pVTZ)= -387.5928325

|   |           |           |           |
|---|-----------|-----------|-----------|
| C | 0.000000  | 0.000000  | 0.000000  |
| B | 0.000000  | 0.000000  | 1.709131  |
| B | 1.516462  | 0.000000  | 0.792113  |
| B | 1.259927  | 0.941091  | -0.679551 |
| B | -0.404928 | 1.552245  | -0.667286 |
| B | -1.186343 | 0.943060  | 0.802227  |
| C | 1.244408  | 1.089069  | 2.053629  |
| B | 2.105810  | 1.655567  | 0.694946  |
| B | 0.919135  | 2.623444  | -0.205803 |
| B | -0.607471 | 2.624479  | 0.719796  |
| B | -0.359410 | 1.655924  | 2.188053  |
| B | 0.948081  | 2.692570  | 1.564837  |
| N | -0.387404 | -1.217469 | -0.642692 |
| H | 1.259012  | 3.529293  | -0.882077 |
| H | -0.827299 | 1.845509  | 3.252656  |
| H | 1.351350  | 3.578937  | 2.228360  |

|   |           |           |           |
|---|-----------|-----------|-----------|
| H | -1.363411 | 3.531052  | 0.707585  |
| H | -0.240961 | -0.959390 | 2.343558  |
| H | -2.304546 | 0.566150  | 0.779789  |
| H | 1.796045  | 0.925225  | 2.965300  |
| H | 3.265761  | 1.847191  | 0.772498  |
| H | 1.757412  | 0.565450  | -1.681653 |
| H | -1.015741 | 1.564397  | -1.676705 |
| H | 2.189434  | -0.959657 | 0.873766  |
| H | -0.012320 | -1.281216 | -1.578540 |
| H | -1.392073 | -1.315825 | -0.682098 |

26

1-PH<sub>2</sub>-*meta*-carborane, E(B3LYP/aug-cc-pVTZ)= -674.1961403

|   |           |           |           |
|---|-----------|-----------|-----------|
| C | 0.000000  | 0.000000  | 0.000000  |
| B | 0.000000  | 0.000000  | 1.695764  |
| B | 1.522436  | 0.000000  | 0.773526  |
| B | 1.264310  | 0.932280  | -0.695741 |
| B | -0.409173 | 1.535186  | -0.671060 |
| B | -1.190603 | 0.951824  | 0.809303  |
| C | 1.257254  | 1.081004  | 2.037870  |
| B | 2.115298  | 1.654004  | 0.676861  |
| B | 0.922628  | 2.612104  | -0.223479 |
| B | -0.597832 | 2.622567  | 0.715200  |
| B | -0.342715 | 1.660908  | 2.184445  |
| B | 0.963836  | 2.688716  | 1.548486  |
| P | -0.444768 | -1.608495 | -0.861517 |
| H | 1.254498  | 3.516359  | -0.905618 |
| H | -0.798797 | 1.850724  | 3.254138  |
| H | 1.372337  | 3.574840  | 2.209514  |
| H | -1.348219 | 3.533572  | 0.699224  |
| H | -0.233149 | -0.954585 | 2.343057  |
| H | -2.312753 | 0.593192  | 0.804775  |
| H | 1.812110  | 0.913886  | 2.947013  |
| H | 3.276349  | 1.839750  | 0.750906  |
| H | 1.763156  | 0.564577  | -1.698883 |

|   |           |           |           |
|---|-----------|-----------|-----------|
| H | -1.023913 | 1.565590  | -1.676236 |
| H | 2.195375  | -0.959869 | 0.860748  |
| H | -0.873743 | -1.017488 | -2.076154 |
| H | -1.762424 | -1.709795 | -0.346693 |

27

1-CH<sub>3</sub>-*meta*-carborane, E(B3LYP/aug-cc-pVTZ)= -371.5531127

|   |           |           |           |
|---|-----------|-----------|-----------|
| C | 0.000000  | 0.000000  | 0.000000  |
| B | 0.000000  | 0.000000  | 1.700314  |
| B | 1.516109  | 0.000000  | 0.769529  |
| B | 1.266505  | 0.946437  | -0.688832 |
| B | -0.407029 | 1.530555  | -0.663123 |
| B | -1.187321 | 0.946458  | 0.817608  |
| C | 1.254371  | 1.078477  | 2.043303  |
| B | 2.112225  | 1.657879  | 0.685767  |
| B | 0.919168  | 2.618599  | -0.210464 |
| B | -0.603590 | 2.618628  | 0.724345  |
| B | -0.344412 | 1.657902  | 2.193836  |
| B | 0.957801  | 2.689066  | 1.560172  |
| C | -0.444068 | -1.264375 | -0.723294 |
| H | 1.245984  | 3.527953  | -0.888501 |
| H | -0.800562 | 1.844289  | 3.264261  |
| H | 1.365641  | 3.573036  | 2.224645  |
| H | -1.356127 | 3.527976  | 0.708952  |
| H | -0.230073 | -0.959516 | 2.341410  |
| H | -2.307654 | 0.579713  | 0.804807  |
| H | 1.811354  | 0.908499  | 2.950570  |
| H | 3.273208  | 1.844170  | 0.763459  |
| H | 1.762118  | 0.579475  | -1.693577 |
| H | -1.024121 | 1.559269  | -1.668137 |
| H | 2.192026  | -0.959448 | 0.854475  |
| H | -0.115971 | -2.153177 | -0.187655 |
| H | -1.528143 | -1.294589 | -0.804928 |
| H | -0.025301 | -1.295223 | -1.726529 |

27

1-SiH<sub>3</sub>-*meta*-carborane, E(B3LYP/aug-cc-pVTZ)= -622.9485025

|    |           |           |           |
|----|-----------|-----------|-----------|
| C  | 0.000000  | 0.000000  | 0.000000  |
| B  | 0.000000  | 0.000000  | 1.700084  |
| B  | 1.516381  | 0.000000  | 0.768805  |
| B  | 1.260941  | 0.942417  | -0.695932 |
| B  | -0.410579 | 1.538018  | -0.668441 |
| B  | -1.190958 | 0.942432  | 0.809978  |
| C  | 1.253078  | 1.080152  | 2.040254  |
| B  | 2.109753  | 1.657595  | 0.679474  |
| B  | 0.916483  | 2.619007  | -0.216229 |
| B  | -0.607346 | 2.619030  | 0.719692  |
| B  | -0.348040 | 1.657644  | 2.188989  |
| B  | 0.954604  | 2.689264  | 1.554288  |
| Si | -0.556206 | -1.579609 | -0.905284 |
| H  | 1.245634  | 3.527743  | -0.893765 |
| H  | -0.804697 | 1.845650  | 3.258790  |
| H  | 1.361887  | 3.574757  | 2.217284  |
| H  | -1.360473 | 3.527784  | 0.706891  |
| H  | -0.229482 | -0.953188 | 2.350399  |
| H  | -2.314349 | 0.583049  | 0.805047  |
| H  | 1.810488  | 0.912933  | 2.947852  |
| H  | 3.270411  | 1.845712  | 0.755891  |
| H  | 1.764497  | 0.583141  | -1.700198 |
| H  | -1.027262 | 1.572677  | -1.672555 |
| H  | 2.200134  | -0.953206 | 0.858269  |
| H  | -1.300925 | -1.193995 | -2.122270 |
| H  | -1.424523 | -2.367388 | -0.002259 |
| H  | 0.641540  | -2.369807 | -1.267279 |

25

1-OH-*meta*-carborane, E(B3LYP/aug-cc-pVTZ)= -407.4639864

|   |          |          |          |
|---|----------|----------|----------|
| C | 0.000000 | 0.000000 | 0.000000 |
| B | 0.000000 | 0.000000 | 1.700655 |
| B | 1.522794 | 0.000000 | 0.756850 |

|   |           |           |           |
|---|-----------|-----------|-----------|
| B | 1.268958  | 0.942150  | -0.708359 |
| B | -0.417777 | 1.508331  | -0.674184 |
| B | -1.199097 | 0.941989  | 0.821148  |
| C | 1.252585  | 1.082286  | 2.021434  |
| B | 2.105466  | 1.666018  | 0.658854  |
| B | 0.904292  | 2.609312  | -0.241255 |
| B | -0.618645 | 2.609281  | 0.702452  |
| B | -0.347220 | 1.665933  | 2.178784  |
| B | 0.947705  | 2.692653  | 1.529537  |
| O | -0.373988 | -1.186360 | -0.603841 |
| H | 1.218159  | 3.517427  | -0.926500 |
| H | -0.794653 | 1.860809  | 3.250935  |
| H | 1.354110  | 3.582910  | 2.185469  |
| H | -1.372086 | 3.517295  | 0.678542  |
| H | -0.225007 | -0.961938 | 2.336326  |
| H | -2.311677 | 0.555073  | 0.801361  |
| H | 1.814194  | 0.923178  | 2.927657  |
| H | 3.264700  | 1.860923  | 0.735492  |
| H | 1.746504  | 0.555246  | -1.713429 |
| H | -1.040462 | 1.499689  | -1.678936 |
| H | 2.192360  | -0.961827 | 0.838232  |
| H | -0.871865 | -0.988425 | -1.404531 |

25

1-SH-*meta*-carborane, E(B3LYP/aug-cc-pVTZ)= -730.4366368

|   |           |          |           |
|---|-----------|----------|-----------|
| C | 0.000000  | 0.000000 | 0.000000  |
| B | 0.000000  | 0.000000 | 1.701970  |
| B | 1.521870  | 0.000000 | 0.755628  |
| B | 1.267607  | 0.945017 | -0.707793 |
| B | -0.417443 | 1.517956 | -0.674051 |
| B | -1.197247 | 0.941362 | 0.821053  |
| C | 1.255495  | 1.078036 | 2.026796  |
| B | 2.108029  | 1.663403 | 0.664856  |
| B | 0.908425  | 2.612070 | -0.230470 |
| B | -0.612858 | 2.609802 | 0.711852  |

|   |           |           |           |
|---|-----------|-----------|-----------|
| B | -0.342756 | 1.662428  | 2.185045  |
| B | 0.953272  | 2.689713  | 1.539848  |
| S | -0.487795 | -1.553008 | -0.796516 |
| H | 1.225516  | 3.520141  | -0.914325 |
| H | -0.792714 | 1.852138  | 3.257092  |
| H | 1.361162  | 3.577120  | 2.199081  |
| H | -1.368174 | 3.516402  | 0.691572  |
| H | -0.223773 | -0.959637 | 2.342355  |
| H | -2.313645 | 0.568436  | 0.811027  |
| H | 1.817610  | 0.912648  | 2.931873  |
| H | 3.268301  | 1.852776  | 0.739940  |
| H | 1.756166  | 0.571507  | -1.711293 |
| H | -1.039510 | 1.536797  | -1.675994 |
| H | 2.196613  | -0.958628 | 0.839298  |
| H | -1.214548 | -0.980118 | -1.771194 |

24

1-Cl-*meta*-carborane, E(B3LYP/aug-cc-pVTZ)= -791.8408191

|    |           |           |           |
|----|-----------|-----------|-----------|
| C  | 0.000000  | 0.000000  | 0.000000  |
| B  | 0.000000  | 0.000000  | 1.699574  |
| B  | 1.522192  | 0.000000  | 0.755848  |
| B  | 1.253872  | 0.926851  | -0.725219 |
| B  | -0.433725 | 1.503285  | -0.699725 |
| B  | -1.207100 | 0.926869  | 0.800497  |
| C  | 1.247306  | 1.094002  | 2.011903  |
| B  | 2.094593  | 1.663327  | 0.641161  |
| B  | 0.889047  | 2.600511  | -0.262864 |
| B  | -0.630771 | 2.600527  | 0.679335  |
| B  | -0.357226 | 1.663349  | 2.161157  |
| B  | 0.933817  | 2.694511  | 1.506190  |
| Cl | -0.498669 | -1.490919 | -0.804343 |
| H  | 1.204947  | 3.501456  | -0.956054 |
| H  | -0.811102 | 1.860248  | 3.229998  |
| H  | 1.336483  | 3.591054  | 2.155743  |
| H  | -1.392126 | 3.501471  | 0.654010  |

|   |           |           |           |
|---|-----------|-----------|-----------|
| H | -0.220652 | -0.957874 | 2.342080  |
| H | -2.318352 | 0.540697  | 0.792498  |
| H | 1.809782  | 0.942554  | 2.919137  |
| H | 3.253777  | 1.860165  | 0.710004  |
| H | 1.740896  | 0.540508  | -1.724026 |
| H | -1.053951 | 1.500172  | -1.700028 |
| H | 2.195851  | -0.957839 | 0.843931  |

24

1-O-*meta*-carborane, E(B3LYP/aug-cc-pVTZ)= -406.925801

|   |           |           |           |
|---|-----------|-----------|-----------|
| C | 0.000000  | 0.000000  | 0.000000  |
| B | 0.000000  | 0.000000  | 1.773242  |
| B | 1.531635  | 0.000000  | 0.891075  |
| B | 1.366924  | 1.042678  | -0.518198 |
| B | -0.289790 | 1.679029  | -0.504996 |
| B | -1.134121 | 1.042630  | 0.920507  |
| C | 1.274746  | 1.021600  | 2.215728  |
| B | 2.185196  | 1.644327  | 0.917572  |
| B | 1.059814  | 2.691131  | 0.051479  |
| B | -0.487457 | 2.691512  | 0.941422  |
| B | -0.305056 | 1.645017  | 2.349913  |
| B | 1.050706  | 2.666544  | 1.825007  |
| O | -0.379031 | -0.999374 | -0.660036 |
| H | 1.439811  | 3.639234  | -0.553485 |
| H | -0.778389 | 1.796572  | 3.425170  |
| H | 1.470026  | 3.498822  | 2.555224  |
| H | -1.201105 | 3.639834  | 0.965803  |
| H | -0.275739 | -0.961548 | 2.400745  |
| H | -2.280907 | 0.754763  | 0.886887  |
| H | 1.799997  | 0.786388  | 3.127597  |
| H | 3.352827  | 1.794181  | 1.049554  |
| H | 1.914049  | 0.752621  | -1.525961 |
| H | -0.875043 | 1.841502  | -1.520898 |
| H | 2.213928  | -0.960540 | 0.967996  |



24

1-S<sup>-</sup>-*meta*-carborane, E(B3LYP/aug-cc-pVTZ)= -729.9073225

|   |           |           |           |
|---|-----------|-----------|-----------|
| C | 0.000000  | 0.000000  | 0.000000  |
| B | 0.000000  | 0.000000  | 1.719815  |
| B | 1.515406  | 0.000000  | 0.812758  |
| B | 1.304543  | 0.993904  | -0.617684 |
| B | -0.354601 | 1.603238  | -0.593472 |
| B | -1.160394 | 0.993633  | 0.857278  |
| C | 1.266893  | 1.061356  | 2.116721  |
| B | 2.143057  | 1.656444  | 0.787839  |
| B | 0.984909  | 2.659749  | -0.089951 |
| B | -0.544403 | 2.659928  | 0.825169  |
| B | -0.318411 | 1.656572  | 2.260708  |
| B | 1.006389  | 2.688648  | 1.681058  |
| S | -0.519017 | -1.455396 | -0.868202 |
| H | 1.338121  | 3.588468  | -0.736801 |
| H | -0.782519 | 1.824077  | 3.336126  |
| H | 1.422891  | 3.549763  | 2.377771  |
| H | -1.281202 | 3.588765  | 0.830715  |
| H | -0.244101 | -0.950587 | 2.369630  |
| H | -2.296585 | 0.679033  | 0.845786  |
| H | 1.810510  | 0.853838  | 3.024574  |
| H | 3.310218  | 1.823374  | 0.887159  |
| H | 1.831179  | 0.678162  | -1.624141 |
| H | -0.958311 | 1.710317  | -1.601363 |
| H | 2.204173  | -0.950038 | 0.904265  |

26

2-NH<sub>2</sub>-*meta*-carborane, E(B3LYP/aug-cc-pVTZ)= -387.6347941

|   |           |          |           |
|---|-----------|----------|-----------|
| C | 0.000000  | 0.000000 | 0.000000  |
| B | 0.000000  | 0.000000 | 1.736567  |
| B | 1.505697  | 0.000000 | 0.750929  |
| B | 1.244536  | 0.876925 | -0.758560 |
| B | -0.425222 | 1.478407 | -0.733529 |
| B | -1.177506 | 0.937425 | 0.788528  |

|   |           |           |           |
|---|-----------|-----------|-----------|
| C | 1.285900  | 1.136062  | 1.972041  |
| B | 2.115679  | 1.647252  | 0.578597  |
| B | 0.909884  | 2.572797  | -0.343832 |
| B | -0.601041 | 2.606895  | 0.620568  |
| B | -0.309874 | 1.707291  | 2.121136  |
| B | 0.977083  | 2.718407  | 1.418955  |
| N | -0.273874 | -1.108090 | 2.606470  |
| H | -0.321443 | -0.919159 | -0.463251 |
| H | 1.228072  | 3.455088  | -1.060167 |
| H | -0.747979 | 1.947523  | 3.188992  |
| H | 1.388047  | 3.633472  | 2.038394  |
| H | -1.352544 | 3.516805  | 0.586200  |
| H | -2.299144 | 0.572616  | 0.808494  |
| H | 1.853126  | 1.001833  | 2.879010  |
| H | 3.278512  | 1.833208  | 0.623075  |
| H | 1.731466  | 0.464622  | -1.749419 |
| H | -1.064214 | 1.464113  | -1.724286 |
| H | 2.177083  | -0.961235 | 0.865706  |
| H | -1.182359 | -1.211915 | 3.022148  |
| H | 0.224007  | -1.977163 | 2.530843  |

26

2-PH<sub>2</sub>-*meta*-carborane, E(B3LYP/aug-cc-pVTZ)= -674.2117703

|   |           |          |           |
|---|-----------|----------|-----------|
| C | 0.000000  | 0.000000 | 0.000000  |
| B | 0.000000  | 0.000000 | 1.703080  |
| B | 1.512806  | 0.000000 | 0.752185  |
| B | 1.246299  | 0.899191 | -0.744210 |
| B | -0.431347 | 1.485167 | -0.726182 |
| B | -1.197178 | 0.927059 | 0.780355  |
| C | 1.256058  | 1.119429 | 1.986684  |
| B | 2.098379  | 1.659534 | 0.604903  |
| B | 0.892745  | 2.586485 | -0.312021 |
| B | -0.626196 | 2.601629 | 0.636339  |
| B | -0.344787 | 1.683014 | 2.131721  |
| B | 0.942998  | 2.709856 | 1.453825  |

|   |           |           |           |
|---|-----------|-----------|-----------|
| P | -0.325111 | -1.491332 | 2.914565  |
| H | -0.308972 | -0.914395 | -0.480089 |
| H | 1.211217  | 3.478710  | -1.015700 |
| H | -0.793413 | 1.906796  | 3.198368  |
| H | 1.345839  | 3.616716  | 2.089615  |
| H | -1.384612 | 3.505343  | 0.607275  |
| H | -2.315658 | 0.557265  | 0.787644  |
| H | 1.819402  | 0.982721  | 2.896020  |
| H | 3.258375  | 1.854796  | 0.668653  |
| H | 1.739164  | 0.499654  | -1.736891 |
| H | -1.057884 | 1.472701  | -1.724402 |
| H | 2.201127  | -0.948837 | 0.852973  |
| H | -1.737811 | -1.506107 | 2.793259  |
| H | -0.124694 | -2.536265 | 1.974759  |

27

2-CH<sub>3</sub>-*meta*-carborane, E(B3LYP/aug-cc-pVTZ)= -371.5662895

|   |           |           |           |
|---|-----------|-----------|-----------|
| C | 0.000000  | 0.000000  | 0.000000  |
| B | 0.000000  | 0.000000  | 1.705772  |
| B | 1.516238  | 0.000000  | 0.731966  |
| B | 1.246457  | 0.894625  | -0.760185 |
| B | -0.429104 | 1.485643  | -0.730149 |
| B | -1.187893 | 0.942946  | 0.781677  |
| C | 1.268099  | 1.110478  | 1.972044  |
| B | 2.109724  | 1.650509  | 0.582510  |
| B | 0.904716  | 2.583238  | -0.329503 |
| B | -0.605381 | 2.611912  | 0.625153  |
| B | -0.327886 | 1.695098  | 2.119955  |
| B | 0.964826  | 2.706151  | 1.438416  |
| C | -0.326717 | -1.246687 | 2.618159  |
| H | -0.317376 | -0.911007 | -0.482080 |
| H | 1.224809  | 3.472841  | -1.036056 |
| H | -0.767853 | 1.922698  | 3.189916  |
| H | 1.378432  | 3.611138  | 2.070710  |
| H | -1.357412 | 3.521458  | 0.596830  |

|   |           |           |           |
|---|-----------|-----------|-----------|
| H | -2.307784 | 0.574527  | 0.794541  |
| H | 1.841154  | 0.979757  | 2.876228  |
| H | 3.271001  | 1.841608  | 0.642299  |
| H | 1.728678  | 0.490955  | -1.756762 |
| H | -1.061027 | 1.474627  | -1.725352 |
| H | 2.192456  | -0.957002 | 0.835965  |
| H | -0.310076 | -0.971337 | 3.673905  |
| H | -1.325913 | -1.631512 | 2.409352  |
| H | 0.378411  | -2.067253 | 2.482232  |

27

2-SiH<sub>3</sub>-*meta*-carborane, E(B3LYP/aug-cc-pVTZ)= -622.9465387

|    |           |           |           |
|----|-----------|-----------|-----------|
| C  | 0.000000  | 0.000000  | 0.000000  |
| B  | 0.000000  | 0.000000  | 1.701454  |
| B  | 1.513887  | 0.000000  | 0.747651  |
| B  | 1.246249  | 0.901178  | -0.747691 |
| B  | -0.432421 | 1.485282  | -0.729035 |
| B  | -1.197725 | 0.929050  | 0.778388  |
| C  | 1.251927  | 1.117648  | 1.985381  |
| B  | 2.097159  | 1.660702  | 0.602201  |
| B  | 0.891367  | 2.587884  | -0.316305 |
| B  | -0.626050 | 2.604339  | 0.630912  |
| B  | -0.347618 | 1.686861  | 2.127076  |
| B  | 0.941213  | 2.711510  | 1.450138  |
| Si | -0.440249 | -1.575983 | 2.876811  |
| H  | -0.307203 | -0.910866 | -0.488643 |
| H  | 1.211061  | 3.479949  | -1.020029 |
| H  | -0.798981 | 1.917911  | 3.190943  |
| H  | 1.344643  | 3.617751  | 2.086709  |
| H  | -1.385641 | 3.507195  | 0.601719  |
| H  | -2.317634 | 0.562622  | 0.782046  |
| H  | 1.822109  | 0.991284  | 2.891860  |
| H  | 3.257029  | 1.856476  | 0.668572  |
| H  | 1.738449  | 0.501018  | -1.740482 |
| H  | -1.058951 | 1.471383  | -1.727307 |

|   |           |           |          |
|---|-----------|-----------|----------|
| H | 2.209995  | -0.943427 | 0.839900 |
| H | -0.368589 | -1.176553 | 4.306308 |
| H | -1.813134 | -2.066480 | 2.592717 |
| H | 0.505496  | -2.703261 | 2.665387 |

25

2-OH-*meta*-carborane, E(B3LYP/aug-cc-pVTZ)= -407.5231531

|   |           |           |           |
|---|-----------|-----------|-----------|
| C | 0.000000  | 0.000000  | 0.000000  |
| B | 0.000000  | 0.000000  | 1.717288  |
| B | 1.515441  | 0.000000  | 0.735592  |
| B | 1.242127  | 0.893791  | -0.756469 |
| B | -0.432903 | 1.486491  | -0.720856 |
| B | -1.185330 | 0.941060  | 0.792789  |
| C | 1.280915  | 1.113772  | 1.977486  |
| B | 2.111639  | 1.649838  | 0.586012  |
| B | 0.901458  | 2.582577  | -0.321196 |
| B | -0.606224 | 2.609936  | 0.639993  |
| B | -0.318414 | 1.694940  | 2.131153  |
| B | 0.970359  | 2.706714  | 1.445565  |
| O | -0.222077 | -1.124164 | 2.494447  |
| H | -1.070479 | 1.480244  | -1.712271 |
| H | -0.756238 | 1.910900  | 3.205468  |
| H | 1.723669  | 0.495735  | -1.755297 |
| H | -1.357962 | 3.519638  | 0.614520  |
| H | 1.217105  | 3.473501  | -1.027457 |
| H | -2.303709 | 0.565360  | 0.816402  |
| H | 1.383074  | 3.613587  | 2.075400  |
| H | 3.272790  | 1.842684  | 0.636289  |
| H | 2.174925  | -0.966172 | 0.852598  |
| H | -0.321135 | -0.916423 | -0.469204 |
| H | 1.849936  | 0.971308  | 2.882487  |
| H | -1.034974 | -1.093333 | 3.003230  |

25

2-SH-*meta*-carborane, E(B3LYP/aug-cc-pVTZ)= -730.4740978

|   |           |           |           |
|---|-----------|-----------|-----------|
| C | 0.000000  | 0.000000  | 0.000000  |
| B | 0.000000  | 0.000000  | 1.708201  |
| B | 1.511534  | 0.000000  | 0.752021  |
| B | 1.243170  | 0.899100  | -0.742739 |
| B | -0.433517 | 1.484750  | -0.720127 |
| B | -1.196882 | 0.924072  | 0.787677  |
| C | 1.259881  | 1.118116  | 1.991674  |
| B | 2.098563  | 1.658265  | 0.609519  |
| B | 0.891063  | 2.586035  | -0.307299 |
| B | -0.625686 | 2.598317  | 0.645254  |
| B | -0.342173 | 1.682595  | 2.138841  |
| B | 0.944968  | 2.708138  | 1.459074  |
| S | -0.307322 | -1.501824 | 2.745747  |
| H | -1.064031 | 1.475296  | -1.715685 |
| H | -0.790433 | 1.900911  | 3.206208  |
| H | 1.736536  | 0.502642  | -1.736171 |
| H | -1.385184 | 3.501253  | 0.618781  |
| H | 1.206992  | 3.480251  | -1.009170 |
| H | -2.313648 | 0.549115  | 0.798222  |
| H | 1.346825  | 3.614877  | 2.095555  |
| H | 3.258615  | 1.853491  | 0.670028  |
| H | 2.190568  | -0.954463 | 0.858322  |
| H | -0.311368 | -0.918443 | -0.470971 |
| H | 1.821445  | 0.974392  | 2.900679  |
| H | -1.480554 | -1.089977 | 3.256634  |

24

2-Cl-*meta*-carborane, E(B3LYP/aug-cc-pVTZ)= -791.894728

|   |           |          |           |
|---|-----------|----------|-----------|
| C | 0.000000  | 0.000000 | 0.000000  |
| B | 0.000000  | 0.000000 | 1.695178  |
| B | 1.520682  | 0.000000 | 0.736371  |
| B | 1.243612  | 0.913989 | -0.741515 |
| B | -0.437073 | 1.493128 | -0.707250 |
| B | -1.203134 | 0.928919 | 0.794306  |
| C | 1.259156  | 1.094140 | 1.996945  |

|    |           |           |           |
|----|-----------|-----------|-----------|
| B  | 2.099131  | 1.657481  | 0.615403  |
| B  | 0.888505  | 2.592797  | -0.285647 |
| B  | -0.624475 | 2.601222  | 0.663622  |
| B  | -0.348667 | 1.671512  | 2.149520  |
| B  | 0.944341  | 2.693686  | 1.483797  |
| Cl | -0.354545 | -1.430003 | 2.702239  |
| H  | -0.313208 | -0.912324 | -0.481878 |
| H  | 1.203771  | 3.494172  | -0.978299 |
| H  | -0.793055 | 1.869278  | 3.221579  |
| H  | 1.349167  | 3.591436  | 2.130656  |
| H  | -1.380908 | 3.506496  | 0.644534  |
| H  | -2.316158 | 0.545617  | 0.805892  |
| H  | 1.821895  | 0.942942  | 2.904197  |
| H  | 3.258504  | 1.854154  | 0.680983  |
| H  | 1.731264  | 0.526959  | -1.741281 |
| H  | -1.067681 | 1.491115  | -1.702537 |
| H  | 2.190513  | -0.959449 | 0.839650  |

24

2-O-*meta*-carborane, E(B3LYP/aug-cc-pVTZ)= -406.9818005

|   |           |           |           |
|---|-----------|-----------|-----------|
| C | 0.000000  | 0.000000  | 0.000000  |
| B | 0.000000  | 0.000000  | 2.583495  |
| B | 1.602218  | 0.000000  | 0.276175  |
| B | 0.917872  | 0.877461  | -1.128648 |
| B | -0.615264 | 1.465921  | -0.491339 |
| B | -0.748157 | 0.859314  | 1.210472  |
| C | 1.997757  | 1.118879  | 1.387453  |
| B | 2.219140  | 1.606277  | -0.224909 |
| B | 0.748020  | 2.573275  | -0.569134 |
| B | -0.260779 | 2.545007  | 0.906110  |
| B | 0.610511  | 1.620290  | 2.154151  |
| B | 1.533321  | 2.669263  | 1.000916  |
| O | 0.011181  | -0.958999 | 3.340552  |
| H | -0.474480 | -0.892296 | -0.381897 |
| H | 0.735161  | 3.506261  | -1.303020 |

|   |           |           |           |
|---|-----------|-----------|-----------|
| H | 0.582238  | 2.066261  | 3.261325  |
| H | 2.095785  | 3.615620  | 1.441856  |
| H | -0.964915 | 3.459982  | 1.182157  |
| H | -1.879292 | 0.687397  | 1.551758  |
| H | 2.903475  | 0.999618  | 1.964187  |
| H | 3.309954  | 1.812086  | -0.644715 |
| H | 0.990358  | 0.512838  | -2.255709 |
| H | -1.610347 | 1.539898  | -1.132222 |
| H | 2.252387  | -0.986612 | 0.135637  |

24

2-S<sup>-</sup>-meta-carborane, E(B3LYP/aug-cc-pVTZ)= -729.943177

|   |           |           |           |
|---|-----------|-----------|-----------|
| C | 0.000000  | 0.000000  | 0.000000  |
| B | 0.000000  | 0.000000  | 1.798197  |
| B | 1.513208  | 0.000000  | 0.698948  |
| B | 1.240129  | 0.831651  | -0.837415 |
| B | -0.416773 | 1.456862  | -0.778285 |
| B | -1.130730 | 0.994084  | 0.785723  |
| C | 1.363521  | 1.170987  | 1.875583  |
| B | 2.161400  | 1.622983  | 0.429575  |
| B | 0.953173  | 2.545579  | -0.483607 |
| B | -0.518160 | 2.645004  | 0.523961  |
| B | -0.210239 | 1.784333  | 2.051672  |
| B | 1.076500  | 2.739603  | 1.275833  |
| S | -0.333334 | -1.341817 | 2.878013  |
| H | -0.354209 | -0.925148 | -0.424118 |
| H | 1.265290  | 3.399594  | -1.243572 |
| H | -0.606518 | 2.122116  | 3.110866  |
| H | 1.526952  | 3.674104  | 1.846104  |
| H | -1.251511 | 3.575207  | 0.476446  |
| H | -2.271263 | 0.692565  | 0.821206  |
| H | 1.963623  | 1.065726  | 2.764403  |
| H | 3.332797  | 1.788972  | 0.430542  |
| H | 1.686812  | 0.375258  | -1.833353 |
| H | -1.088756 | 1.427058  | -1.752417 |



H 2.193708 -0.954666 0.800269

26

4-NH<sub>2</sub>-*meta*-carborane, E(B3LYP/aug-cc-pVTZ)= -387.6333104

|   |           |           |           |
|---|-----------|-----------|-----------|
| C | 0.000000  | 0.000000  | 0.000000  |
| B | 0.000000  | 0.000000  | 1.679205  |
| B | 1.513246  | 0.000000  | 0.724539  |
| B | 1.301323  | 0.931163  | -0.783444 |
| B | -0.402309 | 1.487221  | -0.715656 |
| B | -1.193886 | 0.922239  | 0.778397  |
| C | 1.259483  | 1.091404  | 1.988148  |
| B | 2.106017  | 1.661228  | 0.626576  |
| B | 0.904209  | 2.603727  | -0.276299 |
| B | -0.614806 | 2.600697  | 0.651975  |
| B | -0.349043 | 1.662945  | 2.140995  |
| B | 0.940229  | 2.693814  | 1.490054  |
| N | 1.893399  | 0.450070  | -2.012570 |
| H | -0.293861 | -0.903080 | -0.510255 |
| H | 1.224706  | 3.507152  | -0.966882 |
| H | -0.796726 | 1.869619  | 3.210897  |
| H | 1.345670  | 3.589851  | 2.140153  |
| H | -1.374136 | 3.504242  | 0.626686  |
| H | -0.212701 | -0.949652 | 2.339508  |
| H | -2.315095 | 0.559766  | 0.770435  |
| H | 1.821561  | 0.940225  | 2.895321  |
| H | 3.266145  | 1.859919  | 0.702373  |
| H | -1.020586 | 1.492427  | -1.721111 |
| H | 2.196801  | -0.953939 | 0.816222  |
| H | 1.675110  | 0.930378  | -2.869294 |
| H | 2.849419  | 0.136761  | -2.004162 |

26

4-PH<sub>2</sub>-*meta*-carborane, E(B3LYP/aug-cc-pVTZ)= -674.2119879

|   |          |          |          |
|---|----------|----------|----------|
| C | 0.000000 | 0.000000 | 0.000000 |
| B | 0.000000 | 0.000000 | 1.687001 |

|   |           |           |           |
|---|-----------|-----------|-----------|
| B | 1.514404  | 0.000000  | 0.738932  |
| B | 1.259225  | 0.914886  | -0.752291 |
| B | -0.430726 | 1.485870  | -0.712727 |
| B | -1.205204 | 0.916521  | 0.786126  |
| C | 1.247634  | 1.098545  | 1.995822  |
| B | 2.090174  | 1.665093  | 0.622844  |
| B | 0.883871  | 2.595754  | -0.281460 |
| B | -0.635889 | 2.595297  | 0.657301  |
| B | -0.360702 | 1.662610  | 2.145841  |
| B | 0.926287  | 2.696232  | 1.487670  |
| P | 2.030177  | 0.236998  | -2.414863 |
| H | -0.301321 | -0.909658 | -0.494818 |
| H | 1.198362  | 3.497897  | -0.974308 |
| H | -0.811550 | 1.868741  | 3.214461  |
| H | 1.328102  | 3.597519  | 2.132071  |
| H | -1.395482 | 3.498008  | 0.630460  |
| H | -0.213564 | -0.951485 | 2.343680  |
| H | -2.320881 | 0.538529  | 0.783480  |
| H | 1.813172  | 0.953651  | 2.902201  |
| H | 3.249163  | 1.865313  | 0.692308  |
| H | -1.054473 | 1.486114  | -1.713562 |
| H | 2.199973  | -0.951285 | 0.836916  |
| H | 1.886837  | 1.429634  | -3.168122 |
| H | 3.389835  | 0.479420  | -2.089148 |

27

4-CH<sub>3</sub>-*meta*-carborane, E(B3LYP/aug-cc-pVTZ)= -371.5653312

|   |           |          |           |
|---|-----------|----------|-----------|
| C | 0.000000  | 0.000000 | 0.000000  |
| B | 0.000000  | 0.000000 | 1.689790  |
| B | 1.512238  | 0.000000 | 0.743982  |
| B | 1.256912  | 0.906510 | -0.763313 |
| B | -0.436874 | 1.489878 | -0.703210 |
| B | -1.205903 | 0.919998 | 0.793110  |
| C | 1.248222  | 1.096225 | 1.998728  |
| B | 2.089052  | 1.654628 | 0.619691  |

|   |           |           |           |
|---|-----------|-----------|-----------|
| B | 0.881052  | 2.589352  | -0.282978 |
| B | -0.634180 | 2.596510  | 0.665248  |
| B | -0.355998 | 1.663646  | 2.150944  |
| B | 0.932996  | 2.693360  | 1.484632  |
| C | 1.929967  | 0.420241  | -2.112791 |
| H | -0.311195 | -0.910771 | -0.486764 |
| H | 1.199064  | 3.491449  | -0.975939 |
| H | -0.802682 | 1.870278  | 3.221390  |
| H | 1.338967  | 3.594478  | 2.127142  |
| H | -1.392427 | 3.500887  | 0.641913  |
| H | -0.216287 | -0.950749 | 2.347335  |
| H | -2.321599 | 0.540763  | 0.794619  |
| H | 1.814931  | 0.952716  | 2.904380  |
| H | 3.248110  | 1.860271  | 0.686165  |
| H | -1.060430 | 1.489050  | -1.704388 |
| H | 2.196982  | -0.952316 | 0.837071  |
| H | 1.220489  | 0.414378  | -2.941328 |
| H | 2.744736  | 1.088834  | -2.394872 |
| H | 2.353433  | -0.582595 | -2.033016 |

27

4-SiH<sub>3</sub>-*meta*-carborane, E(B3LYP/aug-cc-pVTZ)= -622.9478243

|    |           |          |           |
|----|-----------|----------|-----------|
| C  | 0.000000  | 0.000000 | 0.000000  |
| B  | 0.000000  | 0.000000 | 1.688986  |
| B  | 1.514320  | 0.000000 | 0.741116  |
| B  | 1.253384  | 0.913112 | -0.749015 |
| B  | -0.436937 | 1.486786 | -0.709228 |
| B  | -1.208206 | 0.915285 | 0.789427  |
| C  | 1.243107  | 1.098765 | 2.000826  |
| B  | 2.084890  | 1.664094 | 0.626155  |
| B  | 0.879232  | 2.594316 | -0.278778 |
| B  | -0.641808 | 2.594242 | 0.662423  |
| B  | -0.364280 | 1.662516 | 2.149670  |
| B  | 0.922941  | 2.696178 | 1.490889  |
| Si | 2.113202  | 0.304961 | -2.465948 |

|   |           |           |           |
|---|-----------|-----------|-----------|
| H | -1.065655 | 1.489721  | -1.707019 |
| H | -0.815883 | 1.865558  | 3.218796  |
| H | -0.214636 | -0.952363 | 2.344259  |
| H | -1.402186 | 3.496285  | 0.635357  |
| H | 1.191163  | 3.499168  | -0.970000 |
| H | -2.322591 | 0.533260  | 0.786511  |
| H | 1.324716  | 3.597741  | 2.134924  |
| H | 3.243328  | 1.867816  | 0.697615  |
| H | 2.199690  | -0.950358 | 0.846283  |
| H | -0.307939 | -0.911179 | -0.487425 |
| H | 1.809408  | 0.954101  | 2.906789  |
| H | 3.591232  | 0.222028  | -2.332489 |
| H | 1.619078  | -1.049878 | -2.840343 |
| H | 1.800839  | 1.225974  | -3.588204 |

25

4-OH-*meta*-carborane, E(B3LYP/aug-cc-pVTZ)= -407.5216812

|   |           |           |           |
|---|-----------|-----------|-----------|
| C | 0.000000  | 0.000000  | 0.000000  |
| B | 0.000000  | 0.000000  | 1.681365  |
| B | 1.516890  | 0.000000  | 0.738362  |
| B | 1.285362  | 0.924409  | -0.769196 |
| B | -0.419065 | 1.487482  | -0.707403 |
| B | -1.201584 | 0.922474  | 0.785021  |
| C | 1.253638  | 1.095238  | 1.994194  |
| B | 2.105027  | 1.658269  | 0.629987  |
| B | 0.896480  | 2.597182  | -0.280894 |
| B | -0.623922 | 2.599630  | 0.654846  |
| B | -0.351449 | 1.664575  | 2.142506  |
| B | 0.938473  | 2.694551  | 1.484768  |
| O | 1.903237  | 0.451388  | -1.921967 |
| H | 1.341544  | 3.595041  | 2.129600  |
| H | 2.198840  | -0.953963 | 0.823647  |
| H | -0.799769 | 1.872952  | 3.211530  |
| H | 1.216950  | 3.496822  | -0.976707 |
| H | -1.380326 | 3.505244  | 0.628505  |

|   |           |           |           |
|---|-----------|-----------|-----------|
| H | 3.263480  | 1.860973  | 0.698317  |
| H | -1.027708 | 1.487314  | -1.719571 |
| H | -2.320091 | 0.552235  | 0.781821  |
| H | -0.215642 | -0.948845 | 2.341377  |
| H | 1.814142  | 0.948428  | 2.903059  |
| H | -0.296029 | -0.907151 | -0.502619 |
| H | 1.612084  | 0.885778  | -2.726096 |

25

4-SH-*meta*-carborane, E(B3LYP/aug-cc-pVTZ)= -730.4739205

|   |           |           |           |
|---|-----------|-----------|-----------|
| C | 0.000000  | 0.000000  | 0.000000  |
| B | 0.000000  | 0.000000  | 1.683546  |
| B | 1.517596  | 0.000000  | 0.738149  |
| B | 1.269511  | 0.921947  | -0.751553 |
| B | -0.421687 | 1.488526  | -0.712995 |
| B | -1.200722 | 0.919749  | 0.784846  |
| C | 1.252993  | 1.096333  | 1.995096  |
| B | 2.099396  | 1.665970  | 0.628142  |
| B | 0.894761  | 2.599860  | -0.280064 |
| B | -0.626546 | 2.598538  | 0.655166  |
| B | -0.354562 | 1.663086  | 2.144277  |
| B | 0.932759  | 2.696310  | 1.489862  |
| S | 2.120456  | 0.314889  | -2.288223 |
| H | 1.335776  | 3.595906  | 2.135555  |
| H | 2.201295  | -0.952178 | 0.828521  |
| H | -0.804523 | 1.868913  | 3.213129  |
| H | 1.213694  | 3.499508  | -0.973585 |
| H | -1.384931 | 3.502089  | 0.626995  |
| H | 3.258190  | 1.863425  | 0.694779  |
| H | -1.039718 | 1.490896  | -1.716902 |
| H | -2.318158 | 0.547327  | 0.778021  |
| H | -0.214375 | -0.951255 | 2.340129  |
| H | 1.815630  | 0.947881  | 2.902548  |
| H | -0.294736 | -0.906029 | -0.504441 |
| H | 1.369258  | 1.003514  | -3.164698 |

24

4-Cl-*meta*-carborane, E(B3LYP/aug-cc-pVTZ)= -791.8957601

|    |           |           |           |
|----|-----------|-----------|-----------|
| C  | 0.000000  | 0.000000  | 0.000000  |
| B  | 0.000000  | 0.000000  | 1.689728  |
| B  | 1.516221  | 0.000000  | 0.751425  |
| B  | 1.247809  | 0.918792  | -0.740579 |
| B  | -0.440019 | 1.493671  | -0.707210 |
| B  | -1.205458 | 0.917282  | 0.789582  |
| C  | 1.248312  | 1.098015  | 1.999180  |
| B  | 2.094687  | 1.662945  | 0.624698  |
| B  | 0.880657  | 2.598607  | -0.282848 |
| B  | -0.636532 | 2.596854  | 0.663071  |
| B  | -0.357172 | 1.663230  | 2.148016  |
| B  | 0.930666  | 2.696416  | 1.484402  |
| Cl | 2.013825  | 0.358768  | -2.262827 |
| H  | -0.297188 | -0.907632 | -0.500666 |
| H  | 1.201175  | 3.493526  | -0.980695 |
| H  | -0.805241 | 1.869901  | 3.217217  |
| H  | 1.334816  | 3.597399  | 2.127134  |
| H  | -1.395201 | 3.499945  | 0.638991  |
| H  | -0.214941 | -0.951901 | 2.345002  |
| H  | -2.320461 | 0.538158  | 0.786469  |
| H  | 1.813431  | 0.955017  | 2.905952  |
| H  | 3.253146  | 1.863300  | 0.683469  |
| H  | -1.051212 | 1.489343  | -1.713751 |
| H  | 2.205162  | -0.948222 | 0.831149  |

24

4-O-*meta*-carborane, E(B3LYP/aug-cc-pVTZ)= -406.9643259

|   |           |          |           |
|---|-----------|----------|-----------|
| C | 0.000000  | 0.000000 | 0.000000  |
| B | 0.000000  | 0.000000 | 1.666815  |
| B | 1.510022  | 0.000000 | 0.672273  |
| B | 1.634203  | 1.131522 | -1.008285 |
| B | -0.324054 | 1.466978 | -0.727962 |

|   |           |           |           |
|---|-----------|-----------|-----------|
| B | -1.173970 | 0.941675  | 0.764675  |
| C | 1.263924  | 1.059437  | 1.981012  |
| B | 2.170877  | 1.620650  | 0.640389  |
| B | 0.958121  | 2.617759  | -0.292083 |
| B | -0.567950 | 2.592519  | 0.630741  |
| B | -0.319965 | 1.670742  | 2.129304  |
| B | 0.995911  | 2.668767  | 1.468810  |
| O | 2.172579  | 0.717000  | -2.067823 |
| H | -0.323857 | -0.903016 | -0.494386 |
| H | 1.252376  | 3.597937  | -0.893263 |
| H | -0.759885 | 1.910205  | 3.201528  |
| H | 1.399913  | 3.563898  | 2.131918  |
| H | -1.297411 | 3.528748  | 0.611909  |
| H | -0.227238 | -0.936791 | 2.351501  |
| H | -2.314647 | 0.619445  | 0.766076  |
| H | 1.824278  | 0.910506  | 2.889912  |
| H | 3.318548  | 1.849568  | 0.826591  |
| H | -0.971741 | 1.503688  | -1.721342 |
| H | 2.166720  | -0.975420 | 0.813410  |

24

4-S<sup>-</sup>-*meta*-carborane, E(B3LYP/aug-cc-pVTZ)= -729.9316774

|   |           |          |           |
|---|-----------|----------|-----------|
| C | 0.000000  | 0.000000 | 0.000000  |
| B | 0.000000  | 0.000000 | 1.681854  |
| B | 1.512930  | 0.000000 | 0.709159  |
| B | 1.372389  | 0.925955 | -0.872028 |
| B | -0.393728 | 1.476797 | -0.712855 |
| B | -1.194206 | 0.922522 | 0.786233  |
| C | 1.246411  | 1.083207 | 1.995560  |
| B | 2.111029  | 1.638442 | 0.617888  |
| B | 0.905146  | 2.589568 | -0.284399 |
| B | -0.613359 | 2.589544 | 0.660386  |
| B | -0.352448 | 1.659331 | 2.151385  |
| B | 0.947653  | 2.677375 | 1.482403  |
| S | 2.129416  | 0.353522 | -2.357072 |

|   |           |           |           |
|---|-----------|-----------|-----------|
| H | -0.300019 | -0.903432 | -0.505133 |
| H | 1.207488  | 3.527484  | -0.939125 |
| H | -0.799479 | 1.874361  | 3.224944  |
| H | 1.354148  | 3.577763  | 2.134853  |
| H | -1.368352 | 3.503334  | 0.637764  |
| H | -0.215325 | -0.950761 | 2.347387  |
| H | -2.321522 | 0.563328  | 0.784007  |
| H | 1.814005  | 0.932031  | 2.899507  |
| H | 3.265794  | 1.854523  | 0.741888  |
| H | -1.046712 | 1.499381  | -1.696733 |
| H | 2.183325  | -0.959480 | 0.846854  |

26

5-NH<sub>2</sub>-*meta*-carborane, E(B3LYP/aug-cc-pVTZ)= -387.6337762

|   |           |           |           |
|---|-----------|-----------|-----------|
| C | 0.000000  | 0.000000  | 0.000000  |
| B | 0.000000  | 0.000000  | 1.679714  |
| B | 1.509229  | 0.000000  | 0.737340  |
| B | 1.218417  | 0.925266  | -0.738375 |
| B | -0.470260 | 1.538130  | -0.753122 |
| B | -1.198266 | 0.925264  | 0.770627  |
| C | 1.246038  | 1.095762  | 1.995565  |
| B | 2.083526  | 1.664792  | 0.613281  |
| B | 0.879603  | 2.608477  | -0.276114 |
| B | -0.634203 | 2.608473  | 0.669134  |
| B | -0.363586 | 1.664772  | 2.141264  |
| B | 0.931978  | 2.693593  | 1.492602  |
| N | -1.237406 | 1.520035  | -1.981744 |
| H | -0.317155 | -0.896599 | -0.507914 |
| H | 1.200399  | 3.513532  | -0.964582 |
| H | -0.815582 | 1.863383  | 3.211274  |
| H | 1.336406  | 3.591925  | 2.140326  |
| H | -1.393619 | 3.513523  | 0.655156  |
| H | -0.228017 | -0.945234 | 2.341374  |
| H | -2.316544 | 0.549943  | 0.768523  |
| H | 1.811528  | 0.950286  | 2.901227  |



|   |           |           |           |
|---|-----------|-----------|-----------|
| H | 3.243342  | 1.863415  | 0.676870  |
| H | 1.707409  | 0.549961  | -1.744084 |
| H | 2.203818  | -0.945239 | 0.822919  |
| H | -2.195203 | 1.827878  | -1.950142 |
| H | -0.788570 | 1.827922  | -2.828439 |

26

5-PH<sub>2</sub>-*meta*-carborane, E(B3LYP/aug-cc-pVTZ)= -674.212252

|   |           |           |           |
|---|-----------|-----------|-----------|
| C | 0.000000  | 0.000000  | 0.000000  |
| B | 0.000000  | 0.000000  | 1.686058  |
| B | 1.513272  | 0.000000  | 0.743396  |
| B | 1.233453  | 0.918357  | -0.737917 |
| B | -0.452229 | 1.499307  | -0.726161 |
| B | -1.206091 | 0.918340  | 0.781714  |
| C | 1.244512  | 1.098035  | 1.997865  |
| B | 2.085581  | 1.664307  | 0.619062  |
| B | 0.875858  | 2.598888  | -0.281103 |
| B | -0.638453 | 2.598909  | 0.662191  |
| B | -0.363802 | 1.664296  | 2.144797  |
| B | 0.927198  | 2.695240  | 1.488384  |
| P | -1.485589 | 1.426573  | -2.384093 |
| H | -0.309042 | -0.906348 | -0.496272 |
| H | 1.192160  | 3.500241  | -0.974146 |
| H | -0.816884 | 1.867777  | 3.213053  |
| H | 1.328694  | 3.596509  | 2.133125  |
| H | -1.399979 | 3.500239  | 0.640547  |
| H | -0.222001 | -0.949237 | 2.343230  |
| H | -2.321477 | 0.537151  | 0.785062  |
| H | 1.809445  | 0.955083  | 2.904687  |
| H | 3.244197  | 1.867573  | 0.683438  |
| H | 1.728290  | 0.536892  | -1.737430 |
| H | 2.201207  | -0.949166 | 0.833774  |
| H | -2.479412 | 2.367766  | -2.012239 |
| H | -0.714658 | 2.368435  | -3.112384 |

27

5-CH<sub>3</sub>-*meta*-carborane, E(B3LYP/aug-cc-pVTZ)= -371.5654948

|   |           |           |           |
|---|-----------|-----------|-----------|
| C | 0.000000  | 0.000000  | 0.000000  |
| B | 0.000000  | 0.000000  | 1.691314  |
| B | 1.515407  | 0.000000  | 0.749817  |
| B | 1.238981  | 0.914992  | -0.728816 |
| B | -0.459136 | 1.493652  | -0.736749 |
| B | -1.203635 | 0.915265  | 0.788418  |
| C | 1.243521  | 1.098885  | 2.002653  |
| B | 2.085665  | 1.662244  | 0.626435  |
| B | 0.874328  | 2.590295  | -0.283352 |
| B | -0.642755 | 2.589688  | 0.661075  |
| B | -0.363325 | 1.661800  | 2.148911  |
| B | 0.921396  | 2.694997  | 1.484909  |
| C | -1.299316 | 1.526790  | -2.079744 |
| H | -0.302842 | -0.913978 | -0.486262 |
| H | 1.190211  | 3.494457  | -0.974632 |
| H | -0.815071 | 1.867347  | 3.217612  |
| H | 1.321083  | 3.598635  | 2.127874  |
| H | -1.402819 | 3.493445  | 0.636924  |
| H | -0.218373 | -0.951060 | 2.347713  |
| H | -2.318871 | 0.532655  | 0.788066  |
| H | 1.807717  | 0.958449  | 2.910264  |
| H | 3.243583  | 1.869622  | 0.694722  |
| H | 1.732412  | 0.534783  | -1.729831 |
| H | 2.201176  | -0.950618 | 0.845163  |
| H | -2.142742 | 0.834155  | -2.058484 |
| H | -1.711658 | 2.523689  | -2.243239 |
| H | -0.693335 | 1.282929  | -2.953521 |

27

5-SiH<sub>3</sub>-*meta*-carborane, E(B3LYP/aug-cc-pVTZ)= -622.9477011

|   |          |          |          |
|---|----------|----------|----------|
| C | 0.000000 | 0.000000 | 0.000000 |
| B | 0.000000 | 0.000000 | 1.688722 |
| B | 1.514941 | 0.000000 | 0.746068 |

|    |           |           |           |
|----|-----------|-----------|-----------|
| B  | 1.236722  | 0.916505  | -0.736927 |
| B  | -0.451103 | 1.493925  | -0.724973 |
| B  | -1.207469 | 0.916512  | 0.783950  |
| C  | 1.243983  | 1.098558  | 1.999263  |
| B  | 2.086920  | 1.662801  | 0.622388  |
| B  | 0.876214  | 2.595563  | -0.280880 |
| B  | -0.639111 | 2.595530  | 0.662005  |
| B  | -0.363636 | 1.662830  | 2.147198  |
| B  | 0.925973  | 2.694593  | 1.488148  |
| Si | -1.515222 | 1.534167  | -2.434981 |
| H  | 1.327301  | 3.595671  | 2.133166  |
| H  | 1.738445  | 0.533967  | -1.732744 |
| H  | 2.200900  | -0.950469 | 0.837979  |
| H  | -0.815779 | 1.867608  | 3.215583  |
| H  | 1.195004  | 3.497691  | -0.972272 |
| H  | -1.400231 | 3.497645  | 0.642549  |
| H  | 3.245133  | 1.867622  | 0.688753  |
| H  | -2.322499 | 0.533993  | 0.794068  |
| H  | -0.220556 | -0.950505 | 2.344676  |
| H  | 1.808603  | 0.956069  | 2.906666  |
| H  | -0.303868 | -0.912114 | -0.488323 |
| H  | -1.802303 | 0.146557  | -2.897867 |
| H  | -2.818754 | 2.223813  | -2.252561 |
| H  | -0.776455 | 2.225248  | -3.523428 |

25

5-OH-*meta*-carborane, E(B3LYP/aug-cc-pVTZ)= -407.5219047

|   |           |          |           |
|---|-----------|----------|-----------|
| C | 0.000000  | 0.000000 | 0.000000  |
| B | 0.000000  | 0.000000 | 1.682350  |
| B | 1.516733  | 0.000000 | 0.744609  |
| B | 1.232366  | 0.916647 | -0.729545 |
| B | -0.467574 | 1.518674 | -0.736179 |
| B | -1.203990 | 0.924301 | 0.787842  |
| C | 1.248453  | 1.098285 | 1.997602  |
| B | 2.086473  | 1.663553 | 0.616746  |

|   |           |           |           |
|---|-----------|-----------|-----------|
| B | 0.875471  | 2.598971  | -0.282052 |
| B | -0.641471 | 2.603599  | 0.673294  |
| B | -0.357107 | 1.664444  | 2.148963  |
| B | 0.927854  | 2.697061  | 1.486660  |
| O | -1.245575 | 1.511847  | -1.890275 |
| H | -0.804937 | 1.864022  | 3.220232  |
| H | -0.221583 | -0.947508 | 2.342424  |
| H | 1.709915  | 0.543874  | -1.741942 |
| H | -1.399569 | 3.507734  | 0.650276  |
| H | 1.190155  | 3.501347  | -0.977490 |
| H | -2.319335 | 0.545422  | 0.778854  |
| H | 1.333816  | 3.598868  | 2.127966  |
| H | 3.244767  | 1.870214  | 0.678823  |
| H | 2.205627  | -0.948481 | 0.837581  |
| H | -0.314694 | -0.902297 | -0.499992 |
| H | 1.813904  | 0.955216  | 2.903613  |
| H | -0.790903 | 1.832937  | -2.671255 |

25

5-SH-*meta*-carborane, E(B3LYP/aug-cc-pVTZ)= -730.4741848

|   |           |           |           |
|---|-----------|-----------|-----------|
| C | 0.000000  | 0.000000  | 0.000000  |
| B | 0.000000  | 0.000000  | 1.682656  |
| B | 1.513214  | 0.000000  | 0.742557  |
| B | 1.230673  | 0.919920  | -0.737529 |
| B | -0.453098 | 1.512013  | -0.724626 |
| B | -1.205539 | 0.923824  | 0.780638  |
| C | 1.245356  | 1.096854  | 1.996682  |
| B | 2.085908  | 1.664083  | 0.615993  |
| B | 0.877898  | 2.603986  | -0.280009 |
| B | -0.636265 | 2.606571  | 0.668748  |
| B | -0.361002 | 1.664878  | 2.145519  |
| B | 0.930717  | 2.694005  | 1.490960  |
| S | -1.503371 | 1.543287  | -2.259682 |
| H | -0.812351 | 1.865457  | 3.214828  |
| H | -0.226700 | -0.947505 | 2.340527  |

|   |           |           |           |
|---|-----------|-----------|-----------|
| H | 1.720300  | 0.543068  | -1.740816 |
| H | -1.395899 | 3.508242  | 0.645218  |
| H | 1.194336  | 3.505364  | -0.972534 |
| H | -2.321204 | 0.545560  | 0.778111  |
| H | 1.336151  | 3.593767  | 2.135025  |
| H | 3.244753  | 1.865921  | 0.678644  |
| H | 2.201279  | -0.949255 | 0.829776  |
| H | -0.315814 | -0.899464 | -0.503584 |
| H | 1.810771  | 0.952501  | 2.902892  |
| H | -0.498100 | 1.683989  | -3.140906 |

24

5-Cl-*meta*-carborane, E(B3LYP/aug-cc-pVTZ)= -791.8966493

|    |           |           |           |
|----|-----------|-----------|-----------|
| C  | 0.000000  | 0.000000  | 0.000000  |
| B  | 0.000000  | 0.000000  | 1.689655  |
| B  | 1.515718  | 0.000000  | 0.746791  |
| B  | 1.246717  | 0.918454  | -0.731346 |
| B  | -0.442863 | 1.497961  | -0.711935 |
| B  | -1.207061 | 0.918470  | 0.795069  |
| C  | 1.244616  | 1.097958  | 2.000708  |
| B  | 2.088468  | 1.662947  | 0.626567  |
| B  | 0.881775  | 2.598994  | -0.281424 |
| B  | -0.642092 | 2.599039  | 0.666560  |
| B  | -0.360934 | 1.662958  | 2.150299  |
| B  | 0.924772  | 2.695610  | 1.486534  |
| Cl | -1.390921 | 1.524131  | -2.235993 |
| H  | -0.311525 | -0.902719 | -0.500813 |
| H  | 1.190711  | 3.499428  | -0.977209 |
| H  | -0.811649 | 1.868441  | 3.218758  |
| H  | 1.324806  | 3.598246  | 2.129498  |
| H  | -1.402738 | 3.499499  | 0.636173  |
| H  | -0.221258 | -0.950925 | 2.344157  |
| H  | -2.322513 | 0.543129  | 0.780933  |
| H  | 1.808962  | 0.956273  | 2.907909  |
| H  | 3.246124  | 1.868337  | 0.694488  |

|   |          |           |           |
|---|----------|-----------|-----------|
| H | 1.726969 | 0.543079  | -1.738206 |
| H | 2.200531 | -0.950983 | 0.837602  |

24

5-O-*meta*-carborane, E(B3LYP/aug-cc-pVTZ)= -406.962792

|   |           |           |           |
|---|-----------|-----------|-----------|
| C | 0.000000  | 0.000000  | 0.000000  |
| B | 0.000000  | 0.000000  | 1.669913  |
| B | 1.506483  | 0.000000  | 0.720459  |
| B | 1.157818  | 0.936780  | -0.749119 |
| B | -0.614628 | 1.969203  | -0.975458 |
| B | -1.175287 | 0.936810  | 0.721318  |
| C | 1.251765  | 1.100049  | 1.986147  |
| B | 2.070814  | 1.644903  | 0.588970  |
| B | 0.900076  | 2.637638  | -0.299025 |
| B | -0.658032 | 2.637655  | 0.682933  |
| B | -0.362023 | 1.644926  | 2.122240  |
| B | 0.923061  | 2.696558  | 1.464539  |
| O | -1.283428 | 1.978188  | -2.036571 |
| H | -0.306451 | -0.913814 | -0.486253 |
| H | 1.311598  | 3.577592  | -0.897378 |
| H | -0.798127 | 1.873284  | 3.200282  |
| H | 1.338006  | 3.590250  | 2.122949  |
| H | -1.375363 | 3.577619  | 0.796031  |
| H | -0.213825 | -0.936341 | 2.361676  |
| H | -2.298747 | 0.557027  | 0.762156  |
| H | 1.822023  | 0.972995  | 2.890972  |
| H | 3.231532  | 1.873158  | 0.660672  |
| H | 1.679391  | 0.556910  | -1.744974 |
| H | 2.222820  | -0.936339 | 0.825946  |

24

5-S-*meta*-carborane, E(B3LYP/aug-cc-pVTZ)= -729.9285172

|   |          |          |          |
|---|----------|----------|----------|
| C | 0.000000 | 0.000000 | 0.000000 |
| B | 0.000000 | 0.000000 | 1.683898 |
| B | 1.510420 | 0.000000 | 0.744431 |

|   |           |           |           |
|---|-----------|-----------|-----------|
| B | 1.210549  | 0.920117  | -0.734722 |
| B | -0.526752 | 1.577014  | -0.846146 |
| B | -1.194717 | 0.919790  | 0.760916  |
| C | 1.249392  | 1.090201  | 2.009290  |
| B | 2.077210  | 1.654171  | 0.621771  |
| B | 0.876164  | 2.596764  | -0.286865 |
| B | -0.645353 | 2.596262  | 0.659427  |
| B | -0.361555 | 1.653921  | 2.138306  |
| B | 0.920489  | 2.688808  | 1.481148  |
| S | -1.456589 | 1.585260  | -2.342008 |
| H | -0.312372 | -0.901163 | -0.502113 |
| H | 1.232568  | 3.515634  | -0.942075 |
| H | -0.813301 | 1.861672  | 3.212460  |
| H | 1.325564  | 3.591509  | 2.131952  |
| H | -1.390936 | 3.514921  | 0.689372  |
| H | -0.222159 | -0.946900 | 2.353909  |
| H | -2.310057 | 0.534384  | 0.800061  |
| H | 1.813422  | 0.951117  | 2.916534  |
| H | 3.240227  | 1.862947  | 0.691389  |
| H | 1.738695  | 0.535695  | -1.718255 |
| H | 2.209229  | -0.947055 | 0.841719  |

26

9-NH<sub>2</sub>-*meta*-carborane, E(B3LYP/aug-cc-pVTZ)= -387.6272971

|   |           |          |           |
|---|-----------|----------|-----------|
| C | 0.000000  | 0.000000 | 0.000000  |
| B | 0.000000  | 0.000000 | 1.687260  |
| B | 1.518531  | 0.000000 | 0.742352  |
| B | 1.243255  | 0.916488 | -0.736534 |
| B | -0.433934 | 1.482732 | -0.714283 |
| B | -1.201578 | 0.923090 | 0.783405  |
| C | 1.245670  | 1.089778 | 2.004197  |
| B | 2.092016  | 1.658846 | 0.631064  |
| B | 0.900079  | 2.627303 | -0.308553 |
| B | -0.619424 | 2.596780 | 0.652195  |
| B | -0.354651 | 1.667711 | 2.143942  |

|   |           |           |           |
|---|-----------|-----------|-----------|
| B | 0.941755  | 2.686338  | 1.492732  |
| N | 1.251769  | 3.731894  | -1.201846 |
| H | -0.304336 | -0.910738 | -0.489958 |
| H | -0.810890 | 1.878410  | 3.209784  |
| H | 1.342737  | 3.590861  | 2.135277  |
| H | -1.371888 | 3.507849  | 0.627007  |
| H | -0.221920 | -0.949925 | 2.343348  |
| H | -2.319555 | 0.550897  | 0.786457  |
| H | 1.808269  | 0.940824  | 2.911684  |
| H | 3.252626  | 1.859742  | 0.694882  |
| H | 1.744438  | 0.535149  | -1.733201 |
| H | -1.053777 | 1.489033  | -1.716420 |
| H | 2.201456  | -0.952768 | 0.836605  |
| H | 0.894685  | 4.645210  | -0.972311 |
| H | 2.206447  | 3.803417  | -1.514590 |

26

9-PH<sub>2</sub>-*meta*-carborane, E(B3LYP/aug-cc-pVTZ)= -674.2113242

|   |           |           |           |
|---|-----------|-----------|-----------|
| C | 0.000000  | 0.000000  | 0.000000  |
| B | 0.000000  | 0.000000  | 1.689265  |
| B | 1.516601  | 0.000000  | 0.745888  |
| B | 1.243333  | 0.918719  | -0.734889 |
| B | -0.439620 | 1.486599  | -0.707833 |
| B | -1.206291 | 0.917239  | 0.789887  |
| C | 1.245683  | 1.095225  | 2.001357  |
| B | 2.090231  | 1.662168  | 0.626305  |
| B | 0.886717  | 2.605325  | -0.292679 |
| B | -0.634328 | 2.595427  | 0.657488  |
| B | -0.358249 | 1.666262  | 2.146627  |
| B | 0.932075  | 2.694298  | 1.484284  |
| P | 1.318794  | 4.086259  | -1.505307 |
| H | -0.304452 | -0.909624 | -0.492043 |
| H | -0.809428 | 1.877165  | 3.214185  |
| H | 1.333572  | 3.596731  | 2.127332  |
| H | -1.392742 | 3.499911  | 0.633134  |



|   |           |           |           |
|---|-----------|-----------|-----------|
| H | -0.218618 | -0.950094 | 2.346317  |
| H | -2.322348 | 0.540475  | 0.790245  |
| H | 1.810204  | 0.953656  | 2.908904  |
| H | 3.248468  | 1.866349  | 0.694418  |
| H | 1.737312  | 0.536788  | -1.734374 |
| H | -1.058171 | 1.489807  | -1.710704 |
| H | 2.202641  | -0.950291 | 0.838578  |
| H | 1.494752  | 5.083705  | -0.509789 |
| H | 2.711423  | 3.830150  | -1.623171 |

27

9-CH<sub>3</sub>-*meta*-carborane, E(B3LYP/aug-cc-pVTZ)= -371.5636369

|   |           |           |           |
|---|-----------|-----------|-----------|
| C | 0.000000  | 0.000000  | 0.000000  |
| B | 0.000000  | 0.000000  | 1.689464  |
| B | 1.514750  | 0.000000  | 0.745221  |
| B | 1.239299  | 0.916960  | -0.734924 |
| B | -0.438044 | 1.489880  | -0.707381 |
| B | -1.207237 | 0.917829  | 0.790320  |
| C | 1.245607  | 1.098810  | 1.998255  |
| B | 2.085432  | 1.663396  | 0.622483  |
| B | 0.885892  | 2.619520  | -0.303189 |
| B | -0.636972 | 2.592513  | 0.660962  |
| B | -0.361604 | 1.663801  | 2.146924  |
| B | 0.926386  | 2.693522  | 1.481495  |
| C | 1.302315  | 3.840642  | -1.234249 |
| H | -0.305474 | -0.909912 | -0.490811 |
| H | -0.810423 | 1.872015  | 3.216339  |
| H | 1.326594  | 3.597777  | 2.124667  |
| H | -1.396925 | 3.496645  | 0.637533  |
| H | -0.216024 | -0.950660 | 2.346858  |
| H | -2.322672 | 0.538033  | 0.790333  |
| H | 1.811281  | 0.957416  | 2.904989  |
| H | 3.244722  | 1.868042  | 0.688313  |
| H | 1.734288  | 0.535598  | -1.734782 |
| H | -1.062574 | 1.490147  | -1.708117 |

|   |          |           |           |
|---|----------|-----------|-----------|
| H | 2.201860 | -0.949737 | 0.839157  |
| H | 2.256834 | 3.668278  | -1.734502 |
| H | 0.559448 | 4.022752  | -2.012583 |
| H | 1.400912 | 4.765013  | -0.662729 |

27

9-SiH<sub>3</sub>-*meta*-carborane, E(B3LYP/aug-cc-pVTZ)= -622.9484866

|    |           |           |           |
|----|-----------|-----------|-----------|
| C  | 0.000000  | 0.000000  | 0.000000  |
| B  | 0.000000  | 0.000000  | 1.688728  |
| B  | 1.516827  | 0.000000  | 0.741977  |
| B  | 1.241774  | 0.918898  | -0.738615 |
| B  | -0.439781 | 1.491076  | -0.709019 |
| B  | -1.207079 | 0.918749  | 0.789461  |
| C  | 1.246647  | 1.096595  | 1.997259  |
| B  | 2.089056  | 1.664193  | 0.618773  |
| B  | 0.883818  | 2.606634  | -0.294111 |
| B  | -0.635508 | 2.595950  | 0.660108  |
| B  | -0.359411 | 1.664369  | 2.147531  |
| B  | 0.928574  | 2.694694  | 1.483188  |
| Si | 1.401293  | 4.157671  | -1.468710 |
| H  | -1.063899 | 1.488522  | -1.708817 |
| H  | -0.806619 | 1.874890  | 3.216669  |
| H  | -0.215793 | -0.951009 | 2.345585  |
| H  | 1.730521  | 0.533713  | -1.739172 |
| H  | -1.397766 | 3.497335  | 0.641008  |
| H  | -2.322799 | 0.541207  | 0.787579  |
| H  | 1.331082  | 3.595249  | 2.128263  |
| H  | 3.247338  | 1.867975  | 0.690885  |
| H  | 2.203070  | -0.950012 | 0.835218  |
| H  | -0.306514 | -0.908062 | -0.493353 |
| H  | 1.813625  | 0.956894  | 2.903318  |
| H  | 0.385530  | 4.395545  | -2.528558 |
| H  | 1.528470  | 5.412991  | -0.681549 |
| H  | 2.704729  | 3.927084  | -2.148235 |

25

9-OH-*meta*-carborane, E(B3LYP/aug-cc-pVTZ)= !!!!!!!!!

|   |           |           |           |
|---|-----------|-----------|-----------|
| C | 0.000000  | 0.000000  | 0.000000  |
| B | 0.000000  | 0.000000  | 1.687118  |
| B | 1.515484  | 0.000000  | 0.741969  |
| B | 1.240220  | 0.909667  | -0.736950 |
| B | -0.436934 | 1.486106  | -0.709158 |
| B | -1.206310 | 0.923407  | 0.789763  |
| C | 1.246550  | 1.097398  | 1.998763  |
| B | 2.090309  | 1.660806  | 0.623129  |
| B | 0.889598  | 2.623737  | -0.300001 |
| B | -0.630497 | 2.593524  | 0.667056  |
| B | -0.359348 | 1.661386  | 2.150604  |
| B | 0.933102  | 2.689984  | 1.496202  |
| O | 1.320616  | 3.679573  | -1.116342 |
| H | 1.333790  | 3.596158  | 2.134742  |
| H | 1.735788  | 0.537394  | -1.738653 |
| H | 2.199045  | -0.951663 | 0.839503  |
| H | -0.810751 | 1.866573  | 3.219368  |
| H | -1.382391 | 3.505581  | 0.633332  |
| H | 3.248379  | 1.867096  | 0.685132  |
| H | -1.061587 | 1.497329  | -1.709778 |
| H | -2.322400 | 0.545804  | 0.790171  |
| H | -0.216434 | -0.951025 | 2.343089  |
| H | 1.812792  | 0.950984  | 2.904341  |
| H | -0.307969 | -0.909704 | -0.489610 |
| H | 0.624812  | 4.289024  | -1.367641 |

25

9-SH-*meta*-carborane, E(B3LYP/aug-cc-pVTZ)= -730.4721696

|   |           |          |           |
|---|-----------|----------|-----------|
| C | 0.000000  | 0.000000 | 0.000000  |
| B | 0.000000  | 0.000000 | 1.689557  |
| B | 1.518128  | 0.000000 | 0.747966  |
| B | 1.245275  | 0.915841 | -0.733782 |
| B | -0.440949 | 1.482733 | -0.711550 |

|   |           |           |           |
|---|-----------|-----------|-----------|
| B | -1.205908 | 0.915417  | 0.788002  |
| C | 1.243787  | 1.095393  | 2.003124  |
| B | 2.091835  | 1.659283  | 0.631508  |
| B | 0.885567  | 2.603706  | -0.293411 |
| B | -0.633826 | 2.593252  | 0.653595  |
| B | -0.359609 | 1.668048  | 2.144098  |
| B | 0.933045  | 2.694004  | 1.485443  |
| S | 1.422784  | 3.991245  | -1.430074 |
| H | 1.332761  | 3.600475  | 2.123053  |
| H | 1.742624  | 0.539882  | -1.733074 |
| H | 2.203039  | -0.950787 | 0.841667  |
| H | -0.814074 | 1.881140  | 3.209701  |
| H | -1.388345 | 3.500577  | 0.624867  |
| H | 3.248493  | 1.869700  | 0.694184  |
| H | -1.055392 | 1.487192  | -1.716154 |
| H | -2.322474 | 0.540486  | 0.788757  |
| H | -0.220124 | -0.948851 | 2.347403  |
| H | 1.806318  | 0.954952  | 2.912038  |
| H | -0.302144 | -0.910468 | -0.491920 |
| H | 0.664406  | 4.951798  | -0.875376 |

24

9-Cl-*meta*-carborane, E(B3LYP/aug-cc-pVTZ)= -791.8956091

|   |           |          |           |
|---|-----------|----------|-----------|
| C | 0.000000  | 0.000000 | 0.000000  |
| B | 0.000000  | 0.000000 | 1.689964  |
| B | 1.515131  | 0.000000 | 0.747135  |
| B | 1.239682  | 0.912344 | -0.734879 |
| B | -0.447180 | 1.486255 | -0.708740 |
| B | -1.210606 | 0.914536 | 0.791912  |
| C | 1.243966  | 1.101331 | 1.999116  |
| B | 2.086784  | 1.662333 | 0.626473  |
| B | 0.872562  | 2.599259 | -0.284948 |
| B | -0.648070 | 2.591448 | 0.665555  |
| B | -0.365952 | 1.662360 | 2.149360  |
| B | 0.920575  | 2.697203 | 1.489364  |

|    |           |           |           |
|----|-----------|-----------|-----------|
| Cl | 1.351351  | 3.979685  | -1.343368 |
| H  | -0.304244 | -0.909697 | -0.492044 |
| H  | -0.814607 | 1.870142  | 3.218223  |
| H  | 1.321849  | 3.605790  | 2.121926  |
| H  | -1.399304 | 3.499717  | 0.632641  |
| H  | -0.214267 | -0.950594 | 2.346985  |
| H  | -2.324813 | 0.533123  | 0.791207  |
| H  | 1.810167  | 0.962285  | 2.905926  |
| H  | 3.241860  | 1.881217  | 0.683880  |
| H  | 1.734675  | 0.546814  | -1.738264 |
| H  | -1.063779 | 1.493671  | -1.711954 |
| H  | 2.203922  | -0.947799 | 0.840675  |

24

9-O-*meta*-carborane, E(B3LYP/aug-cc-pVTZ)= -406.9409445

|   |           |           |           |
|---|-----------|-----------|-----------|
| C | 0.000000  | 0.000000  | 0.000000  |
| B | 0.000000  | 0.000000  | 1.691449  |
| B | 1.508644  | 0.000000  | 0.740118  |
| B | 1.238088  | 0.908258  | -0.744425 |
| B | -0.423255 | 1.498702  | -0.719641 |
| B | -1.196368 | 0.935027  | 0.790950  |
| C | 1.255025  | 1.093895  | 1.990266  |
| B | 2.095797  | 1.655821  | 0.615732  |
| B | 0.946667  | 2.758305  | -0.421526 |
| B | -0.626884 | 2.597337  | 0.659177  |
| B | -0.349755 | 1.672938  | 2.133513  |
| B | 0.952581  | 2.697899  | 1.462185  |
| O | 1.299313  | 3.733340  | -1.179807 |
| H | -0.315534 | -0.910726 | -0.483343 |
| H | -0.793264 | 1.879083  | 3.212334  |
| H | 1.348936  | 3.576825  | 2.151418  |
| H | -1.405633 | 3.491744  | 0.658637  |
| H | -0.221460 | -0.951321 | 2.353979  |
| H | -2.316907 | 0.551076  | 0.796124  |
| H | 1.817161  | 0.948156  | 2.898761  |

|   |           |           |           |
|---|-----------|-----------|-----------|
| H | 3.266531  | 1.810699  | 0.706141  |
| H | 1.730805  | 0.472176  | -1.729231 |
| H | -1.082205 | 1.457839  | -1.703901 |
| H | 2.188049  | -0.961531 | 0.840188  |

24

9-S<sup>-</sup>-*meta*-carborane, E(B3LYP/aug-cc-pVTZ)= -729.9172863

|   |           |           |           |
|---|-----------|-----------|-----------|
| C | 0.000000  | 0.000000  | 0.000000  |
| B | 0.000000  | 0.000000  | 1.689932  |
| B | 1.508950  | 0.000000  | 0.737105  |
| B | 1.240877  | 0.915126  | -0.748898 |
| B | -0.420269 | 1.504236  | -0.722722 |
| B | -1.193520 | 0.933191  | 0.786299  |
| C | 1.254237  | 1.092938  | 1.986615  |
| B | 2.095864  | 1.659973  | 0.605420  |
| B | 0.933781  | 2.689839  | -0.379172 |
| B | -0.618969 | 2.601168  | 0.649713  |
| B | -0.344705 | 1.672925  | 2.130955  |
| B | 0.953152  | 2.700991  | 1.452686  |
| S | 1.435488  | 4.034799  | -1.435952 |
| H | -0.313961 | -0.907797 | -0.489651 |
| H | -0.789169 | 1.886904  | 3.206416  |
| H | 1.356263  | 3.583881  | 2.126941  |
| H | -1.390149 | 3.497899  | 0.643256  |
| H | -0.222397 | -0.950137 | 2.352922  |
| H | -2.315393 | 0.557207  | 0.789020  |
| H | 1.821496  | 0.952844  | 2.892716  |
| H | 3.261630  | 1.827955  | 0.692903  |
| H | 1.726846  | 0.490657  | -1.738111 |
| H | -1.067090 | 1.472451  | -1.711270 |
| H | 2.192082  | -0.957912 | 0.832973  |

26

1-NH<sub>2</sub>-*para*-carborane, E(B3LYP/aug-cc-pVTZ)= -387.5973511

|   |          |          |          |
|---|----------|----------|----------|
| C | 0.000000 | 0.000000 | 0.000000 |
|---|----------|----------|----------|

|   |           |           |           |
|---|-----------|-----------|-----------|
| B | 0.000000  | 0.000000  | 1.713713  |
| B | 1.526156  | 0.000000  | 0.786460  |
| B | 1.280990  | 0.945486  | -0.689006 |
| B | -0.409390 | 1.506562  | -0.680764 |
| B | -1.196324 | 0.950359  | 0.815762  |
| B | 1.325903  | 1.067736  | 2.167435  |
| B | 2.109577  | 1.663161  | 0.683780  |
| B | 0.910270  | 2.596858  | -0.236767 |
| B | -0.612690 | 2.600346  | 0.690695  |
| B | -0.350061 | 1.667213  | 2.179053  |
| C | 0.904831  | 2.567874  | 1.467746  |
| N | -0.458234 | -1.184906 | -0.653154 |
| H | 2.186961  | -0.977097 | 0.755461  |
| H | -0.841288 | 2.012812  | 3.192265  |
| H | 1.233759  | 3.565151  | -0.824369 |
| H | -1.277796 | 3.572250  | 0.707782  |
| H | 1.218500  | 3.462694  | 1.979901  |
| H | 1.769502  | 0.589540  | -1.701228 |
| H | 3.237384  | 2.002445  | 0.710221  |
| H | -1.019809 | 1.541083  | -1.689259 |
| H | -2.320379 | 0.604124  | 0.788466  |
| H | -0.329578 | -0.970572 | 2.293821  |
| H | 1.937519  | 1.021852  | 3.172996  |
| H | -0.553016 | -1.056177 | -1.650423 |
| H | 0.144327  | -1.975053 | -0.471938 |

26

1-PH<sub>2</sub>-*para*-carborane, E(B3LYP/aug-cc-pVTZ)= -371.5578679

|   |           |          |           |
|---|-----------|----------|-----------|
| C | 0.000000  | 0.000000 | 0.000000  |
| B | 0.000000  | 0.000000 | 1.717743  |
| B | 1.519198  | 0.000000 | 0.787881  |
| B | 1.261191  | 0.941227 | -0.698778 |
| B | -0.422631 | 1.506989 | -0.696481 |
| B | -1.201033 | 0.931913 | 0.799105  |
| B | 1.313879  | 1.083664 | 2.164674  |

|   |           |           |           |
|---|-----------|-----------|-----------|
| B | 2.091640  | 1.664947  | 0.671861  |
| B | 0.888333  | 2.600155  | -0.246561 |
| B | -0.634349 | 2.593801  | 0.675556  |
| B | -0.367414 | 1.663012  | 2.168784  |
| C | 0.881522  | 2.570854  | 1.454223  |
| P | -0.481437 | -1.530426 | -0.975392 |
| H | -2.327539 | 0.588681  | 0.781399  |
| H | 1.214889  | 3.567101  | -0.834267 |
| H | 1.927541  | 1.048118  | 3.169387  |
| H | 3.216845  | 2.012128  | 0.693727  |
| H | 1.189073  | 3.469777  | 1.963873  |
| H | -0.326842 | -0.964071 | 2.310072  |
| H | -0.869168 | 2.010284  | 3.176299  |
| H | 2.198271  | -0.962921 | 0.767510  |
| H | 1.761153  | 0.594263  | -1.706815 |
| H | -1.033900 | 1.541918  | -1.703537 |
| H | -1.310703 | 3.557827  | 0.696094  |
| H | -0.106361 | -2.475191 | 0.013809  |
| H | -1.846198 | -1.544221 | -0.589570 |

27

1-CH<sub>3</sub>-*para*-carborane, E(B3LYP/aug-cc-pVTZ)= -371.5578679

|   |           |           |           |
|---|-----------|-----------|-----------|
| C | 0.000000  | 0.000000  | 0.000000  |
| B | 0.000000  | 0.000000  | 1.713324  |
| B | 1.520507  | 0.000000  | 0.797404  |
| B | 1.262919  | 0.932068  | -0.689781 |
| B | -0.415125 | 1.514600  | -0.689588 |
| B | -1.194740 | 0.940632  | 0.796639  |
| B | 1.315551  | 1.080629  | 2.171370  |
| B | 2.097994  | 1.658628  | 0.681379  |
| B | 0.900330  | 2.597133  | -0.240518 |
| B | -0.622085 | 2.601535  | 0.681342  |
| B | -0.365606 | 1.662733  | 2.171470  |
| C | 0.890336  | 2.569451  | 1.462674  |
| C | -0.439388 | -1.266804 | -0.720848 |



|   |           |           |           |
|---|-----------|-----------|-----------|
| H | 2.191067  | -0.969127 | 0.774892  |
| H | -0.867339 | 2.009839  | 3.179095  |
| H | 1.234434  | 3.562192  | -0.827529 |
| H | -1.293456 | 3.569166  | 0.703133  |
| H | 1.201223  | 3.466391  | 1.973274  |
| H | 1.763692  | 0.584027  | -1.698400 |
| H | 3.224240  | 2.003082  | 0.703767  |
| H | -1.023901 | 1.551492  | -1.698125 |
| H | -2.321134 | 0.594757  | 0.773865  |
| H | -0.334741 | -0.966019 | 2.299908  |
| H | 1.924428  | 1.042857  | 3.179048  |
| H | -0.465467 | -1.105569 | -1.796458 |
| H | 0.249366  | -2.083091 | -0.513407 |
| H | -1.433418 | -1.566388 | -0.395424 |

27

1-SiH<sub>3</sub>-*para*-carborane, E(B3LYP/aug-cc-pVTZ)= -622.9525986

|    |           |           |           |
|----|-----------|-----------|-----------|
| C  | 0.000000  | 0.000000  | 0.000000  |
| B  | 0.000000  | 0.000000  | 1.715092  |
| B  | 1.521272  | 0.000000  | 0.792667  |
| B  | 1.262465  | 0.935606  | -0.696705 |
| B  | -0.421594 | 1.507349  | -0.695877 |
| B  | -1.200645 | 0.935662  | 0.797026  |
| B  | 1.314545  | 1.084543  | 2.166951  |
| B  | 2.093650  | 1.663141  | 0.674627  |
| B  | 0.891169  | 2.597473  | -0.247960 |
| B  | -0.631109 | 2.597616  | 0.675159  |
| B  | -0.368933 | 1.663413  | 2.168105  |
| C  | 0.882595  | 2.569866  | 1.454518  |
| Si | -0.544488 | -1.588391 | -0.897817 |
| H  | -1.032605 | 1.549366  | -1.703549 |
| H  | 3.218738  | 2.011139  | 0.696301  |
| H  | -0.869670 | 2.011742  | 3.175730  |
| H  | 1.924979  | 1.051266  | 3.173746  |
| H  | 1.191309  | 3.468900  | 1.963528  |

|   |           |           |           |
|---|-----------|-----------|-----------|
| H | -2.328589 | 0.596231  | 0.781087  |
| H | -1.304703 | 3.563632  | 0.695771  |
| H | -0.328262 | -0.962329 | 2.311464  |
| H | 2.201412  | -0.962578 | 0.777136  |
| H | 1.769325  | 0.595577  | -1.704295 |
| H | 1.220878  | 3.563398  | -0.835868 |
| H | -2.021318 | -1.609549 | -0.982656 |
| H | 0.040332  | -1.596373 | -2.256784 |
| H | -0.063933 | -2.760026 | -0.132753 |

25

1-OH-*para*-carborane, E(B3LYP/aug-cc-pVTZ)= -407.4685537

|   |           |           |           |
|---|-----------|-----------|-----------|
| C | 0.000000  | 0.000000  | 0.000000  |
| B | 0.000000  | 0.000000  | 1.704981  |
| B | 1.530873  | 0.000000  | 0.789825  |
| B | 1.262690  | 0.923340  | -0.703895 |
| B | -0.428792 | 1.498369  | -0.701774 |
| B | -1.208644 | 0.939821  | 0.796272  |
| B | 1.315852  | 1.080567  | 2.159097  |
| B | 2.092988  | 1.660836  | 0.667620  |
| B | 0.887205  | 2.583355  | -0.260002 |
| B | -0.631224 | 2.593203  | 0.669651  |
| B | -0.370035 | 1.661652  | 2.161798  |
| C | 0.882599  | 2.566543  | 1.446970  |
| O | -0.396089 | -1.128803 | -0.695552 |
| H | -2.327891 | 0.575294  | 0.770966  |
| H | 1.215192  | 3.547748  | -0.850748 |
| H | 1.922177  | 1.045362  | 3.168089  |
| H | 3.217036  | 2.011655  | 0.686014  |
| H | 1.191805  | 3.466491  | 1.952948  |
| H | -0.333192 | -0.979026 | 2.274694  |
| H | -0.866211 | 2.006396  | 3.172690  |
| H | 2.189604  | -0.976287 | 0.764863  |
| H | 1.752365  | 0.561982  | -1.710809 |
| H | -1.039157 | 1.516158  | -1.707466 |

|   |           |           |           |
|---|-----------|-----------|-----------|
| H | -1.301516 | 3.561330  | 0.686309  |
| H | -0.517403 | -1.858377 | -0.078535 |

25

1-SH-*para*-carborane, E(B3LYP/aug-cc-pVTZ)= -730.4413275

|   |           |           |           |
|---|-----------|-----------|-----------|
| C | 0.000000  | 0.000000  | 0.000000  |
| B | 0.000000  | 0.000000  | 1.726646  |
| B | 1.515191  | 0.000000  | 0.786072  |
| B | 1.259116  | 0.944299  | -0.706734 |
| B | -0.427193 | 1.503478  | -0.704100 |
| B | -1.204828 | 0.918863  | 0.796858  |
| B | 1.307833  | 1.088541  | 2.161853  |
| B | 2.082695  | 1.667619  | 0.665400  |
| B | 0.877747  | 2.600207  | -0.250131 |
| B | -0.646511 | 2.584581  | 0.668118  |
| B | -0.374669 | 1.661102  | 2.165667  |
| C | 0.869488  | 2.571770  | 1.449470  |
| S | -0.444455 | -1.544714 | -0.837603 |
| H | 1.757677  | 0.591479  | -1.711708 |
| H | 1.926239  | 1.057449  | 3.163505  |
| H | -1.330334 | 3.543221  | 0.686087  |
| H | -0.880822 | 2.010134  | 3.170120  |
| H | 1.174261  | 3.473040  | 1.956667  |
| H | -1.041681 | 1.529425  | -1.708210 |
| H | 1.199053  | 3.568017  | -0.839209 |
| H | -2.327655 | 0.564040  | 0.773028  |
| H | -0.324135 | -0.969624 | 2.308234  |
| H | 2.191722  | -0.963703 | 0.762758  |
| H | 3.207235  | 2.016195  | 0.689421  |
| H | -1.683005 | -1.163330 | -1.194669 |

24

1-Cl-*para*-carborane, E(B3LYP/aug-cc-pVTZ)= -791.8462717

|   |          |          |          |
|---|----------|----------|----------|
| C | 0.000000 | 0.000000 | 0.000000 |
| B | 0.000000 | 0.000000 | 1.712768 |

|    |           |           |           |
|----|-----------|-----------|-----------|
| B  | 1.523339  | 0.000000  | 0.780136  |
| B  | 1.249551  | 0.918370  | -0.727180 |
| B  | -0.444251 | 1.485073  | -0.726876 |
| B  | -1.216364 | 0.917584  | 0.780798  |
| B  | 1.307266  | 1.100986  | 2.138477  |
| B  | 2.076649  | 1.666451  | 0.636135  |
| B  | 0.864668  | 2.581108  | -0.292520 |
| B  | -0.653914 | 2.580945  | 0.636541  |
| B  | -0.380537 | 1.665921  | 2.138986  |
| C  | 0.862608  | 2.574603  | 1.410809  |
| Cl | -0.498377 | -1.487120 | -0.814982 |
| H  | 2.195104  | -0.965029 | 0.760925  |
| H  | -0.882943 | 2.020950  | 3.142828  |
| H  | 1.184826  | 3.540691  | -0.894896 |
| H  | -1.337185 | 3.539688  | 0.647484  |
| H  | 1.166373  | 3.481722  | 1.907808  |
| H  | 1.741585  | 0.550952  | -1.730131 |
| H  | 3.199617  | 2.019974  | 0.648325  |
| H  | -1.059006 | 1.489488  | -1.729404 |
| H  | -2.334039 | 0.552362  | 0.760303  |
| H  | -0.322613 | -0.966150 | 2.300543  |
| H  | 1.922488  | 1.081337  | 3.142120  |

24

1-O-*para*-carborane, E(B3LYP/aug-cc-pVTZ)= -406.9276741

|   |           |          |           |
|---|-----------|----------|-----------|
| C | 0.000000  | 0.000000 | 0.000000  |
| B | 0.000000  | 0.000000 | 1.787240  |
| B | 1.540974  | 0.000000 | 0.904265  |
| B | 1.356463  | 1.038900 | -0.524332 |
| B | -0.299531 | 1.681384 | -0.524538 |
| B | -1.137768 | 1.039386 | 0.903918  |
| B | 1.339127  | 1.001024 | 2.338080  |
| B | 2.175777  | 1.641823 | 0.912331  |
| B | 1.040323  | 2.679214 | 0.030432  |
| B | -0.498063 | 2.679498 | 0.911991  |

|   |           |           |           |
|---|-----------|-----------|-----------|
| B | -0.313835 | 1.642068  | 2.338061  |
| C | 0.992343  | 2.556828  | 1.731466  |
| O | -0.383255 | -0.989528 | -0.669639 |
| H | 2.218402  | -0.969220 | 0.866177  |
| H | -0.823798 | 1.954028  | 3.360916  |
| H | 1.427402  | 3.678202  | -0.475341 |
| H | -1.130475 | 3.678317  | 0.989797  |
| H | 1.321705  | 3.406329  | 2.306532  |
| H | 1.907051  | 0.778759  | -1.538470 |
| H | 3.316480  | 1.951997  | 0.991342  |
| H | -0.881160 | 1.861607  | -1.538723 |
| H | -2.291567 | 0.781391  | 0.864777  |
| H | -0.375594 | -0.969494 | 2.351426  |
| H | 1.925956  | 0.886981  | 3.360959  |

24

1-S<sup>-</sup>-*para*-carborane, E(B3LYP/aug-cc-pVTZ)= -729.9080955

|   |           |           |           |
|---|-----------|-----------|-----------|
| C | 0.000000  | 0.000000  | 0.000000  |
| B | 0.000000  | 0.000000  | 1.743026  |
| B | 1.524752  | 0.000000  | 0.843063  |
| B | 1.302397  | 0.983248  | -0.612472 |
| B | -0.360624 | 1.591019  | -0.612341 |
| B | -1.165421 | 0.983433  | 0.843207  |
| B | 1.326535  | 1.048336  | 2.249035  |
| B | 2.131997  | 1.656422  | 0.792288  |
| B | 0.965841  | 2.640583  | -0.108464 |
| B | -0.560393 | 2.640880  | 0.792535  |
| B | -0.337862 | 1.656353  | 2.249352  |
| C | 0.941112  | 2.573053  | 1.594397  |
| S | -0.524908 | -1.436385 | -0.889801 |
| H | 2.210439  | -0.958859 | 0.821949  |
| H | -0.845111 | 1.986702  | 3.265905  |
| H | 1.324706  | 3.624796  | -0.658325 |
| H | -1.215956 | 3.624622  | 0.840697  |
| H | 1.260896  | 3.448128  | 2.136482  |

|   |           |           |           |
|---|-----------|-----------|-----------|
| H | 1.836511  | 0.691028  | -1.622146 |
| H | 3.267633  | 1.984661  | 0.841653  |
| H | -0.957383 | 1.713479  | -1.621808 |
| H | -2.308109 | 0.693744  | 0.821097  |
| H | -0.349841 | -0.959564 | 2.332060  |
| H | 1.927498  | 0.972922  | 3.265402  |

26

2-NH<sub>2</sub>-*para*-carborane, E(B3LYP/aug-cc-pVTZ)= -387.6369566

|   |           |           |           |
|---|-----------|-----------|-----------|
| C | 0.000000  | 0.000000  | 0.000000  |
| B | 0.000000  | 0.000000  | 1.762017  |
| B | 1.504323  | 0.000000  | 0.777736  |
| B | 1.237799  | 0.880981  | -0.750191 |
| B | -0.444781 | 1.452406  | -0.750181 |
| B | -1.193226 | 0.916287  | 0.777772  |
| B | 1.323890  | 1.138677  | 2.113259  |
| B | 2.083219  | 1.654321  | 0.592190  |
| B | 0.869094  | 2.558260  | -0.351833 |
| B | -0.644527 | 2.580888  | 0.592072  |
| B | -0.356462 | 1.709480  | 2.113128  |
| C | 0.880585  | 2.592302  | 1.346864  |
| N | -0.401745 | -1.183471 | 2.495476  |
| H | -1.322355 | 3.544285  | 0.587814  |
| H | 3.207665  | 2.005340  | 0.587955  |
| H | 1.191007  | 3.505689  | -0.972678 |
| H | 1.192430  | 3.510342  | 1.818689  |
| H | 2.178744  | -0.967248 | 0.786555  |
| H | 1.950551  | 1.144792  | 3.111727  |
| H | 1.738168  | 0.497361  | -1.745200 |
| H | -1.075343 | 1.452933  | -1.745163 |
| H | -2.317250 | 0.559959  | 0.786313  |
| H | -0.849803 | 2.096259  | 3.111481  |
| H | -0.314185 | -0.925363 | -0.455950 |
| H | 0.299189  | -1.699814 | 2.999960  |
| H | -1.272872 | -1.167193 | 2.998735  |

26

2-PH<sub>2</sub>-*para*-carborane, E(B3LYP/aug-cc-pVTZ)= -674.216683

|   |           |           |           |
|---|-----------|-----------|-----------|
| C | 0.000000  | 0.000000  | 0.000000  |
| B | 0.000000  | 0.000000  | 1.720877  |
| B | 1.513142  | 0.000000  | 0.772549  |
| B | 1.237704  | 0.896646  | -0.744485 |
| B | -0.450786 | 1.460344  | -0.744511 |
| B | -1.209743 | 0.908987  | 0.772500  |
| B | 1.310345  | 1.121568  | 2.118758  |
| B | 2.074504  | 1.664005  | 0.605354  |
| B | 0.857204  | 2.567662  | -0.332868 |
| B | -0.658875 | 2.576509  | 0.605270  |
| B | -0.373950 | 1.683854  | 2.118661  |
| C | 0.862639  | 2.584149  | 1.368346  |
| P | -0.541551 | -1.622823 | 2.664159  |
| H | -1.342024 | 3.535696  | 0.611064  |
| H | 3.196851  | 2.020475  | 0.611175  |
| H | 1.175840  | 3.521984  | -0.944755 |
| H | 1.167717  | 3.498174  | 1.852396  |
| H | 2.195417  | -0.960697 | 0.766357  |
| H | 1.929741  | 1.120298  | 3.120420  |
| H | 1.735335  | 0.522154  | -1.743819 |
| H | -1.073540 | 1.459858  | -1.743877 |
| H | -2.332306 | 0.550820  | 0.766237  |
| H | -0.870010 | 2.054971  | 3.120249  |
| H | -0.306148 | -0.917076 | -0.478419 |
| H | 0.540242  | -1.665935 | 3.581185  |
| H | -1.432435 | -1.007721 | 3.581237  |

27

2-CH<sub>3</sub>-*para*-carborane, E(B3LYP/aug-cc-pVTZ)= -371.5696614

|   |          |          |          |
|---|----------|----------|----------|
| C | 0.000000 | 0.000000 | 0.000000 |
| B | 0.000000 | 0.000000 | 1.719392 |
| B | 1.519701 | 0.000000 | 0.760943 |

|   |           |           |           |
|---|-----------|-----------|-----------|
| B | 1.244619  | 0.885336  | -0.756930 |
| B | -0.439826 | 1.462695  | -0.756908 |
| B | -1.200143 | 0.932253  | 0.760978  |
| B | 1.324307  | 1.121082  | 2.100497  |
| B | 2.089624  | 1.655759  | 0.582937  |
| B | 0.878222  | 2.562243  | -0.355327 |
| B | -0.634510 | 2.589482  | 0.582971  |
| B | -0.358081 | 1.697744  | 2.100494  |
| C | 0.885630  | 2.583785  | 1.348362  |
| C | -0.433637 | -1.265166 | 2.569388  |
| H | -1.307642 | 3.556099  | 0.584760  |
| H | 3.214189  | 2.006199  | 0.584704  |
| H | 1.203413  | 3.511011  | -0.972655 |
| H | 1.198718  | 3.497220  | 1.828142  |
| H | 2.190569  | -0.968832 | 0.763318  |
| H | 1.944923  | 1.123288  | 3.102427  |
| H | 1.733773  | 0.502988  | -1.757966 |
| H | -1.060702 | 1.460820  | -1.757930 |
| H | -2.324278 | 0.578674  | 0.763380  |
| H | -0.846842 | 2.080200  | 3.102430  |
| H | -0.312903 | -0.912890 | -0.482205 |
| H | -0.361919 | -1.055760 | 3.637852  |
| H | -1.465061 | -1.560146 | 2.371280  |
| H | 0.200028  | -2.130814 | 2.371345  |

27

2-SiH<sub>3</sub>-*para*-carborane, E(B3LYP/aug-cc-pVTZ)= -622.95188

|   |           |          |           |
|---|-----------|----------|-----------|
| C | 0.000000  | 0.000000 | 0.000000  |
| B | 0.000000  | 0.000000 | 1.715168  |
| B | 1.517280  | 0.000000 | 0.768562  |
| B | 1.239904  | 0.897840 | -0.747287 |
| B | -0.447779 | 1.463882 | -0.747302 |
| B | -1.210448 | 0.914869 | 0.768538  |
| B | 1.312762  | 1.119795 | 2.113108  |
| B | 2.077970  | 1.664585 | 0.600795  |



|    |           |           |           |
|----|-----------|-----------|-----------|
| B  | 0.861874  | 2.569715  | -0.336018 |
| B  | -0.654062 | 2.580898  | 0.600773  |
| B  | -0.372089 | 1.684881  | 2.113103  |
| C  | 0.866859  | 2.584571  | 1.365529  |
| Si | -0.537819 | -1.603564 | 2.811028  |
| H  | -1.335248 | 3.541513  | 0.607108  |
| H  | 3.200616  | 2.020202  | 0.607145  |
| H  | 1.181673  | 3.523187  | -0.948957 |
| H  | 1.173101  | 3.497650  | 1.850590  |
| H  | 2.204266  | -0.956632 | 0.757262  |
| H  | 1.932641  | 1.121043  | 3.114855  |
| H  | 1.734686  | 0.521659  | -1.747523 |
| H  | -1.069309 | 1.462108  | -1.747547 |
| H  | -2.335320 | 0.565936  | 0.757208  |
| H  | -0.865854 | 2.059649  | 3.114850  |
| H  | -0.305136 | -0.909794 | -0.492574 |
| H  | -0.435896 | -1.299594 | 4.261967  |
| H  | -1.939362 | -2.011132 | 2.525499  |
| H  | 0.334582  | -2.773766 | 2.525534  |

25

2-OH-*para*-carborane, E(B3LYP/aug-cc-pVTZ)= -407.523931

|   |           |           |           |
|---|-----------|-----------|-----------|
| C | 0.000000  | 0.000000  | 0.000000  |
| B | 0.000000  | 0.000000  | 1.710867  |
| B | 1.532558  | 0.000000  | 0.749466  |
| B | 1.252346  | 0.880485  | -0.760188 |
| B | -0.433204 | 1.468317  | -0.760197 |
| B | -1.200195 | 0.953037  | 0.749453  |
| B | 1.336431  | 1.113404  | 2.094405  |
| B | 2.101459  | 1.650148  | 0.574956  |
| B | 0.892927  | 2.560368  | -0.357152 |
| B | -0.619557 | 2.599093  | 0.574941  |
| B | -0.354235 | 1.703023  | 2.094400  |
| C | 0.898560  | 2.576561  | 1.351621  |
| O | -0.402349 | -1.153697 | 2.381748  |

|   |           |           |           |
|---|-----------|-----------|-----------|
| H | -1.283690 | 3.571725  | 0.579222  |
| H | 3.226397  | 1.998862  | 0.579239  |
| H | 1.223905  | 3.509365  | -0.970386 |
| H | 1.216098  | 3.487094  | 1.833799  |
| H | 2.184511  | -0.980464 | 0.765671  |
| H | 1.950712  | 1.108027  | 3.100951  |
| H | 1.734978  | 0.499610  | -1.764693 |
| H | -1.048009 | 1.470169  | -1.764707 |
| H | -2.320467 | 0.590631  | 0.765651  |
| H | -0.838638 | 2.080823  | 3.100939  |
| H | -0.319278 | -0.915508 | -0.473248 |
| H | -0.378782 | -1.085610 | 3.337521  |

25

2-SH-*para*-carborane, E(B3LYP/aug-cc-pVTZ)= -730.475101

|   |           |           |           |
|---|-----------|-----------|-----------|
| C | 0.000000  | 0.000000  | 0.000000  |
| B | 0.000000  | 0.000000  | 1.703363  |
| B | 1.529287  | 0.000000  | 0.756751  |
| B | 1.249010  | 0.894727  | -0.749820 |
| B | -0.439111 | 1.472335  | -0.749801 |
| B | -1.208721 | 0.936838  | 0.756780  |
| B | 1.323490  | 1.105917  | 2.107953  |
| B | 2.089823  | 1.658225  | 0.594730  |
| B | 0.878924  | 2.568746  | -0.336069 |
| B | -0.635945 | 2.590893  | 0.594741  |
| B | -0.368586 | 1.684871  | 2.107975  |
| C | 0.880571  | 2.573545  | 1.371402  |
| S | -0.523335 | -1.529472 | 2.638548  |
| H | -1.308627 | 3.557253  | 0.605124  |
| H | 3.213499  | 2.009943  | 0.605114  |
| H | 1.205359  | 3.522813  | -0.943800 |
| H | 1.191345  | 3.481810  | 1.862414  |
| H | 2.195087  | -0.969975 | 0.758967  |
| H | 1.935852  | 1.095670  | 3.113941  |
| H | 1.737066  | 0.518910  | -1.753291 |

|   |           |           |           |
|---|-----------|-----------|-----------|
| H | -1.055112 | 1.474282  | -1.753260 |
| H | -2.329171 | 0.578044  | 0.759020  |
| H | -0.858864 | 2.051901  | 3.113967  |
| H | -0.311060 | -0.909075 | -0.490800 |
| H | -0.345102 | -1.008506 | 3.863827  |

24

2-Cl-*para*-carborane, E(B3LYP/aug-cc-pVTZ)= -791.9001247

|    |           |           |           |
|----|-----------|-----------|-----------|
| C  | 0.000000  | 0.000000  | 0.000000  |
| B  | 0.000000  | 0.000000  | 1.709297  |
| B  | 1.522052  | 0.000000  | 0.769678  |
| B  | 1.244511  | 0.903494  | -0.736339 |
| B  | -0.445245 | 1.472029  | -0.736339 |
| B  | -1.212506 | 0.920042  | 0.769678  |
| B  | 1.314733  | 1.104718  | 2.127884  |
| B  | 2.079131  | 1.661703  | 0.618239  |
| B  | 0.865523  | 2.572478  | -0.312746 |
| B  | -0.651797 | 2.580560  | 0.618254  |
| B  | -0.379546 | 1.674774  | 2.127884  |
| C  | 0.865414  | 2.572111  | 1.392465  |
| Cl | -0.486868 | -1.447033 | 2.650687  |
| H  | -1.330546 | 3.542424  | 0.629634  |
| H  | 3.201267  | 2.017640  | 0.629621  |
| H  | 1.187947  | 3.530777  | -0.915490 |
| H  | 1.171026  | 3.480443  | 1.886523  |
| H  | 2.189140  | -0.969264 | 0.772374  |
| H  | 1.924484  | 1.087859  | 3.134170  |
| H  | 1.741015  | 0.534620  | -1.738040 |
| H  | -1.063746 | 1.478309  | -1.738041 |
| H  | -2.329818 | 0.551139  | 0.772374  |
| H  | -0.875474 | 2.029930  | 3.134170  |
| H  | -0.307700 | -0.914524 | -0.481797 |

24

2-O-*para*-carborane, E(B3LYP/aug-cc-pVTZ)= -406.966424

|   |           |           |           |
|---|-----------|-----------|-----------|
| C | 0.000000  | 0.000000  | 0.000000  |
| B | 0.000000  | 0.000000  | 2.194734  |
| B | 1.463806  | 0.000000  | 0.792864  |
| B | 1.233381  | 0.866140  | -0.761646 |
| B | -0.449572 | 1.438517  | -0.761655 |
| B | -1.160274 | 0.892449  | 0.792856  |
| B | 1.357637  | 1.159137  | 2.119338  |
| B | 2.077344  | 1.635977  | 0.557105  |
| B | 0.866817  | 2.548649  | -0.372156 |
| B | -0.649131 | 2.563262  | 0.557063  |
| B | -0.369401 | 1.746525  | 2.119327  |
| C | 0.879524  | 2.586046  | 1.330848  |
| O | -0.341913 | -1.005249 | 2.872202  |
| H | -1.311523 | 3.544670  | 0.556173  |
| H | 3.200727  | 2.010051  | 0.556183  |
| H | 1.192959  | 3.507591  | -0.983736 |
| H | 1.194817  | 3.513122  | 1.782298  |
| H | 2.165974  | -0.954882 | 0.791180  |
| H | 2.046294  | 1.270285  | 3.076652  |
| H | 1.749842  | 0.492432  | -1.760680 |
| H | -1.086774 | 1.457170  | -1.760696 |
| H | -2.299023 | 0.563683  | 0.791177  |
| H | -0.847505 | 2.254505  | 3.076629  |
| H | -0.314109 | -0.923581 | -0.462434 |

24

2-S-*para*-carborane, E(B3LYP/aug-cc-pVTZ)= -729.9350111

|   |           |          |           |
|---|-----------|----------|-----------|
| C | 0.000000  | 0.000000 | 0.000000  |
| B | 0.000000  | 0.000000 | 1.838961  |
| B | 1.508087  | 0.000000 | 0.748063  |
| B | 1.245975  | 0.839163 | -0.803442 |
| B | -0.426230 | 1.440554 | -0.803504 |
| B | -1.162870 | 0.960184 | 0.748089  |
| B | 1.364934  | 1.170005 | 2.049264  |
| B | 2.111915  | 1.637382 | 0.494030  |

|   |           |           |           |
|---|-----------|-----------|-----------|
| B | 0.911709  | 2.535449  | -0.465486 |
| B | -0.585667 | 2.607094  | 0.494033  |
| B | -0.307319 | 1.771280  | 2.049142  |
| C | 0.939444  | 2.612712  | 1.239941  |
| S | -0.491512 | -1.366977 | 2.840932  |
| H | -1.245754 | 3.588114  | 0.470696  |
| H | 3.245568  | 1.973459  | 0.470647  |
| H | 1.245216  | 3.462979  | -1.118020 |
| H | 1.272212  | 3.538444  | 1.681912  |
| H | 2.190848  | -0.962000 | 0.756042  |
| H | 2.026647  | 1.239562  | 3.024734  |
| H | 1.728695  | 0.418714  | -1.797949 |
| H | -1.066078 | 1.423839  | -1.798052 |
| H | -2.301900 | 0.653229  | 0.756132  |
| H | -0.773295 | 2.246403  | 3.024522  |
| H | -0.334429 | -0.930372 | -0.429967 |

28

1,2-NH<sub>2</sub>-*ortho*-carborane, E(B3LYP/aug-cc-pVTZ)= -442.948093

|   |           |           |           |
|---|-----------|-----------|-----------|
| C | 0.000000  | 0.000000  | 0.000000  |
| C | 0.000000  | 0.000000  | 1.895371  |
| B | 1.428144  | 0.000000  | 0.947700  |
| B | 1.221341  | 1.032184  | -0.504544 |
| B | -0.482651 | 1.524523  | -0.504550 |
| B | -1.208094 | 0.761643  | 0.947669  |
| B | 1.221324  | 1.032219  | 2.399920  |
| B | 1.987800  | 1.684002  | 0.947677  |
| B | 0.765119  | 2.648281  | 0.066270  |
| B | -0.783426 | 2.484655  | 0.947688  |
| B | -0.482683 | 1.524501  | 2.399914  |
| B | 0.765115  | 2.648309  | 1.829083  |
| N | -0.348302 | -1.205545 | 2.482167  |
| N | -0.348272 | -1.205553 | -0.586801 |
| H | -2.281072 | 0.271387  | 0.947684  |
| H | 1.784317  | 0.723262  | -1.494992 |
| H | 1.041346  | 3.604454  | 2.465174  |

|   |           |           |           |
|---|-----------|-----------|-----------|
| H | 3.139260  | 1.946752  | 0.947658  |
| H | 1.041368  | 3.604412  | -0.569837 |
| H | -1.123664 | 1.563419  | 3.390363  |
| H | -1.617340 | 3.321007  | 0.947688  |
| H | 1.784296  | 0.723317  | 3.390375  |
| H | 2.074343  | -0.986942 | 0.947701  |
| H | -1.123614 | 1.563446  | -1.495008 |
| H | 0.391490  | -1.678998 | 2.974375  |
| H | -1.226588 | -1.211495 | 2.974403  |
| H | -1.226615 | -1.211556 | -1.078937 |
| H | 0.391498  | -1.678922 | -1.079125 |

26

1,2-OH-*ortho*-carborane, E(B3LYP/aug-cc-pVTZ)= -482.683302

|   |           |           |           |
|---|-----------|-----------|-----------|
| C | 0.000000  | 0.000000  | 0.000000  |
| C | 0.000000  | 0.000000  | 1.776301  |
| B | 1.466976  | 0.000000  | 0.888817  |
| B | 1.221492  | 1.017765  | -0.557437 |
| B | -0.488257 | 1.515016  | -0.559933 |
| B | -1.234605 | 0.798134  | 0.887450  |
| B | 1.221049  | 1.018242  | 2.334512  |
| B | 1.989401  | 1.690490  | 0.888645  |
| B | 0.761427  | 2.637511  | 0.002332  |
| B | -0.786369 | 2.495652  | 0.887817  |
| B | -0.489007 | 1.514537  | 2.335642  |
| B | 0.760914  | 2.637561  | 1.774268  |
| O | -0.292761 | -1.187032 | -0.596732 |
| O | -0.293835 | -1.187196 | 2.372384  |
| H | 2.084325  | -0.999357 | 0.888894  |
| H | -1.118540 | 1.525134  | 3.333679  |
| H | 1.035841  | 3.591255  | -0.636673 |
| H | -1.616335 | 3.334990  | 0.887788  |
| H | 1.034750  | 3.591395  | 2.413388  |
| H | 1.758195  | 0.697786  | -1.555467 |
| H | 3.137651  | 1.962515  | 0.888805  |

|   |           |           |           |
|---|-----------|-----------|-----------|
| H | -1.117049 | 1.525695  | -1.558381 |
| H | -2.291833 | 0.269467  | 0.887308  |
| H | 1.757055  | 0.698368  | 3.332961  |
| H | -1.218110 | -1.200688 | -0.867493 |
| H | -1.216513 | -1.195951 | 2.652322  |

26

1,2-SH-*ortho*-carborane, E(B3LYP/aug-cc-pVTZ)= -1128.626200

|   |           |           |           |
|---|-----------|-----------|-----------|
| C | 0.000000  | 0.000000  | 0.000000  |
| C | 0.000000  | 0.000000  | 1.827995  |
| B | 1.453113  | 0.000000  | 0.914018  |
| B | 1.218687  | 1.028557  | -0.536259 |
| B | -0.487075 | 1.522873  | -0.534577 |
| B | -1.232578 | 0.772033  | 0.913993  |
| B | 1.218681  | 1.028574  | 2.364265  |
| B | 1.987903  | 1.689632  | 0.913987  |
| B | 0.761861  | 2.646105  | 0.031329  |
| B | -0.784208 | 2.491580  | 0.913977  |
| B | -0.487081 | 1.522886  | 2.362556  |
| B | 0.761844  | 2.646143  | 1.796608  |
| S | -0.508880 | -1.482299 | 2.670176  |
| S | -0.508871 | -1.482317 | -0.842157 |
| H | -2.305985 | 0.289060  | 0.913991  |
| H | 1.774975  | 0.717471  | -1.527306 |
| H | 1.038349  | 3.598496  | 2.437259  |
| H | 3.139315  | 1.950251  | 0.913977  |
| H | 1.038384  | 3.598437  | -0.609346 |
| H | -1.122356 | 1.554714  | 3.353384  |
| H | -1.617327 | 3.327537  | 0.913962  |
| H | 1.774956  | 0.717475  | 3.355316  |
| H | 2.108291  | -0.978882 | 0.914028  |
| H | -1.122328 | 1.554699  | -1.525419 |
| H | 0.724618  | -1.993110 | 2.835049  |
| H | 0.724635  | -1.993096 | -1.007069 |

25

1-O<sup>-</sup>,2-OH-*ortho*-carborane, E(B3LYP/aug-cc-pVTZ)= -482.178423

|   |           |           |           |
|---|-----------|-----------|-----------|
| C | 0.000000  | 0.000000  | 0.000000  |
| C | 0.000000  | 0.000000  | 1.905754  |
| B | 1.479704  | 0.000000  | 1.064333  |
| B | 1.297146  | 1.049210  | -0.341404 |
| B | -0.418099 | 1.615062  | -0.341261 |
| B | -1.189145 | 0.880594  | 1.064576  |
| B | 1.243559  | 0.923813  | 2.556688  |
| B | 2.058937  | 1.645971  | 1.154394  |
| B | 0.876428  | 2.656276  | 0.287699  |
| B | -0.675057 | 2.548083  | 1.154517  |
| B | -0.449493 | 1.482574  | 2.556796  |
| B | 0.853320  | 2.585914  | 2.072127  |
| O | -0.358204 | -1.085447 | -0.492259 |
| O | -0.405114 | -1.227989 | 2.376622  |
| H | 2.083942  | -1.014320 | 1.048013  |
| H | -1.086021 | 1.500826  | 3.554225  |
| H | 1.200203  | 3.637763  | -0.296090 |
| H | -1.455947 | 3.441397  | 1.176152  |
| H | 1.158879  | 3.511686  | 2.748205  |
| H | 1.882149  | 0.834124  | -1.347054 |
| H | 3.218120  | 1.899138  | 1.176104  |
| H | -1.016294 | 1.790538  | -1.346844 |
| H | -2.278413 | 0.425142  | 1.048130  |
| H | 1.766223  | 0.559661  | 3.553974  |
| H | -0.577754 | -1.750794 | 1.567080  |

25

1-S<sup>-</sup>,2-SH-*ortho*-carborane, E(B3LYP/aug-cc-pVTZ)= -1128.118379

|   |           |          |           |
|---|-----------|----------|-----------|
| C | 0.000000  | 0.000000 | 0.000000  |
| C | 0.000000  | 0.000000 | 2.151952  |
| B | 1.377774  | 0.000000 | 1.185030  |
| B | 1.239146  | 1.065498 | -0.249814 |
| B | -0.497533 | 1.556283 | -0.254763 |



|   |           |           |           |
|---|-----------|-----------|-----------|
| B | -1.179989 | 0.719516  | 1.176630  |
| B | 1.203427  | 1.016128  | 2.684053  |
| B | 1.962143  | 1.688288  | 1.246234  |
| B | 0.750106  | 2.662917  | 0.373036  |
| B | -0.797097 | 2.463137  | 1.239238  |
| B | -0.504997 | 1.492590  | 2.678375  |
| B | 0.738528  | 2.637429  | 2.135853  |
| S | -0.396141 | -1.432770 | -0.794084 |
| S | -0.497856 | -1.512994 | 2.938292  |
| H | 2.069076  | -0.957616 | 1.183393  |
| H | -1.168553 | 1.540155  | 3.656729  |
| H | 1.028536  | 3.644897  | -0.232273 |
| H | -1.636216 | 3.301391  | 1.240709  |
| H | 1.005444  | 3.595525  | 2.782427  |
| H | 1.887594  | 0.880522  | -1.219748 |
| H | 3.116048  | 1.963231  | 1.250959  |
| H | -1.140192 | 1.735430  | -1.229550 |
| H | -2.267972 | 0.263074  | 1.173579  |
| H | 1.790026  | 0.711894  | 3.665875  |
| H | 0.712350  | -2.099590 | 2.946727  |

24

1,2-O-*ortho*-carborane, E(B3LYP/aug-cc-pVTZ)= -481.503108

|   |           |          |           |
|---|-----------|----------|-----------|
| C | 0.000000  | 0.000000 | 0.000000  |
| C | 0.000000  | 0.000000 | 2.124603  |
| B | 1.438290  | 0.000000 | 1.063346  |
| B | 1.299987  | 1.025304 | -0.387692 |
| B | -0.390648 | 1.608873 | -0.387928 |
| B | -1.131781 | 0.886469 | 1.063060  |
| B | 1.299832  | 1.025982 | 2.513827  |
| B | 2.087974  | 1.651121 | 1.063038  |
| B | 0.920504  | 2.667210 | 0.176652  |
| B | -0.625214 | 2.587265 | 1.062805  |
| B | -0.390569 | 1.609261 | 2.513715  |
| B | 0.920467  | 2.667609 | 1.948813  |

|   |           |           |           |
|---|-----------|-----------|-----------|
| O | -0.357525 | -1.036721 | -0.614638 |
| O | -0.357642 | -1.036578 | 2.739892  |
| H | 2.086847  | -0.994485 | 1.063225  |
| H | -1.012415 | 1.767508  | 3.516736  |
| H | 1.251393  | 3.625652  | -0.456131 |
| H | -1.400301 | 3.497856  | 1.062327  |
| H | 1.251320  | 3.626368  | 2.581141  |
| H | 1.887263  | 0.767055  | -1.390810 |
| H | 3.259601  | 1.890328  | 1.062646  |
| H | -1.012105 | 1.767582  | -1.391129 |
| H | -2.255799 | 0.504066  | 1.062871  |
| H | 1.886752  | 0.767270  | 3.517020  |

24

1,2-S'-*ortho*-carborane, E(B3LYP/aug-cc-pVTZ)= -1127.474042

|   |           |           |           |
|---|-----------|-----------|-----------|
| C | 0.000000  | 0.000000  | 0.000000  |
| C | 0.000000  | 0.000000  | 2.192474  |
| B | 1.368788  | 0.000000  | 1.095279  |
| B | 1.237453  | 1.048988  | -0.366534 |
| B | -0.475082 | 1.551159  | -0.366698 |
| B | -1.152198 | 0.739223  | 1.095045  |
| B | 1.237507  | 1.048953  | 2.557207  |
| B | 1.984443  | 1.692799  | 1.095335  |
| B | 0.782214  | 2.668066  | 0.213344  |
| B | -0.756364 | 2.496347  | 1.095198  |
| B | -0.475400 | 1.551025  | 2.557132  |
| B | 0.782095  | 2.667944  | 1.977404  |
| S | -0.422883 | -1.442069 | 3.040296  |
| S | -0.422751 | -1.442116 | -0.848937 |
| H | -2.257617 | 0.324532  | 1.095465  |
| H | 1.863876  | 0.822539  | -1.347602 |
| H | 1.067172  | 3.640205  | 2.607903  |
| H | 3.146613  | 1.961683  | 1.095608  |
| H | 1.067387  | 3.640332  | -0.417099 |
| H | -1.124806 | 1.699344  | 3.538207  |

|   |           |           |           |
|---|-----------|-----------|-----------|
| H | -1.589404 | 3.350153  | 1.095503  |
| H | 1.864061  | 0.823198  | 3.538382  |
| H | 2.075483  | -0.945782 | 1.095642  |
| H | -1.124487 | 1.698636  | -1.347867 |

28

9,12-NH<sub>2</sub>-*ortho*-carborane, E(B3LYP/aug-cc-pVTZ)= -443.007131

|   |           |           |           |
|---|-----------|-----------|-----------|
| C | 0.000000  | 0.000000  | 0.000000  |
| C | 0.000000  | 0.000000  | 1.624641  |
| B | 1.514844  | 0.000000  | 0.827464  |
| B | 1.220045  | 0.993218  | -0.625335 |
| B | -0.492286 | 1.481690  | -0.631252 |
| B | -1.270018 | 0.815875  | 0.822088  |
| B | 1.214986  | 0.998406  | 2.247572  |
| B | 2.002830  | 1.677744  | 0.816015  |
| B | 0.778524  | 2.644200  | -0.133300 |
| B | -0.769289 | 2.496615  | 0.794288  |
| B | -0.480072 | 1.510860  | 2.238949  |
| B | 0.788297  | 2.665360  | 1.687567  |
| N | 1.146225  | 3.901280  | 2.391275  |
| N | 1.077760  | 3.842015  | -0.908276 |
| H | 2.135223  | -1.000170 | 0.822624  |
| H | -1.087375 | 1.539097  | 3.250167  |
| H | -1.578572 | 3.357836  | 0.790231  |
| H | 1.747895  | 0.657937  | -1.626341 |
| H | 3.150771  | 1.962933  | 0.811786  |
| H | -1.106268 | 1.482502  | -1.637563 |
| H | -2.334800 | 0.314619  | 0.823543  |
| H | -0.274895 | -0.925183 | 2.102554  |
| H | 1.730177  | 0.693838  | 3.264547  |
| H | -0.267078 | -0.931060 | -0.470038 |
| H | 1.319981  | 4.655741  | -0.362051 |
| H | 1.692533  | 3.755496  | -1.701297 |
| H | 0.434049  | 4.352372  | 2.942788  |
| H | 2.028430  | 3.925935  | 2.876965  |

26

9,12-OH-*ortho*-carborane, E(B3LYP/aug-cc-pVTZ)= -482.787112

|   |           |           |           |
|---|-----------|-----------|-----------|
| C | 0.000000  | 0.000000  | 0.000000  |
| C | 0.000000  | 0.000000  | 1.627053  |
| B | 1.513659  | 0.000000  | 0.811895  |
| B | 1.216419  | 1.001549  | -0.616768 |
| B | -0.494420 | 1.493485  | -0.620976 |
| B | -1.276743 | 0.806470  | 0.806320  |
| B | 1.214029  | 0.990753  | 2.257427  |
| B | 1.999202  | 1.675639  | 0.823790  |
| B | 0.771762  | 2.650397  | -0.069786 |
| B | -0.789058 | 2.487244  | 0.813461  |
| B | -0.499013 | 1.489270  | 2.251677  |
| B | 0.767124  | 2.643950  | 1.737932  |
| O | 1.092885  | 3.762488  | 2.510642  |
| O | 1.056251  | 3.847386  | -0.753521 |
| H | -2.336651 | 0.295943  | 0.807414  |
| H | 1.741523  | 0.697622  | -1.628843 |
| H | 3.142297  | 1.977640  | 0.822654  |
| H | -1.112946 | 1.497954  | 3.257291  |
| H | -1.591327 | 3.353632  | 0.813852  |
| H | 1.732468  | 0.669403  | 3.265665  |
| H | 2.134769  | -0.999200 | 0.810624  |
| H | -0.264913 | -0.928995 | -0.475659 |
| H | -1.092758 | 1.513093  | -1.636201 |
| H | -0.269592 | -0.929766 | 2.098208  |
| H | 1.225607  | 4.551229  | 1.978247  |
| H | 1.870171  | 3.829170  | -1.260038 |

26

9,12-SH-*ortho*-carborane, E(B3LYP/aug-cc-pVTZ)= -1128.696108

|   |          |          |          |
|---|----------|----------|----------|
| C | 0.000000 | 0.000000 | 0.000000 |
| C | 0.000000 | 0.000000 | 1.624619 |
| B | 1.511046 | 0.000000 | 0.820534 |

|   |           |           |           |
|---|-----------|-----------|-----------|
| B | 1.214896  | 0.990802  | -0.626899 |
| B | -0.499332 | 1.489371  | -0.625488 |
| B | -1.278210 | 0.806348  | 0.821458  |
| B | 1.217208  | 1.004905  | 2.244270  |
| B | 1.997947  | 1.687480  | 0.805007  |
| B | 0.759961  | 2.629151  | -0.108237 |
| B | -0.789821 | 2.493008  | 0.810115  |
| B | -0.493341 | 1.495715  | 2.246564  |
| B | 0.761288  | 2.640063  | 1.690604  |
| S | 1.273745  | 4.138789  | 2.688327  |
| S | 1.182072  | 4.103642  | -1.165181 |
| H | 2.137612  | -0.995085 | 0.819786  |
| H | -1.090758 | 1.516988  | 3.261243  |
| H | -1.599060 | 3.351387  | 0.806826  |
| H | 1.734177  | 0.672382  | -1.634657 |
| H | 3.139601  | 1.982879  | 0.801609  |
| H | -1.111296 | 1.497680  | -1.631737 |
| H | -2.339335 | 0.299433  | 0.820417  |
| H | -0.266810 | -0.926447 | 2.105050  |
| H | 1.735752  | 0.705280  | 3.258070  |
| H | -0.269706 | -0.928386 | -0.474610 |
| H | 1.546179  | 4.893194  | -0.135310 |
| H | 0.071799  | 4.740799  | 2.701992  |

25

9-O<sup>-</sup>,12-OH-*ortho*-carborane, E(B3LYP/aug-cc-pVTZ)= -482.215023

|   |           |          |           |
|---|-----------|----------|-----------|
| C | 0.000000  | 0.000000 | 0.000000  |
| C | 0.000000  | 0.000000 | 1.633185  |
| B | 1.509016  | 0.000000 | 0.805503  |
| B | 1.215743  | 0.997699 | -0.636919 |
| B | -0.478104 | 1.498279 | -0.636918 |
| B | -1.266623 | 0.820231 | 0.805500  |
| B | 1.227579  | 1.001796 | 2.238774  |
| B | 2.008958  | 1.663066 | 0.800509  |
| B | 0.824667  | 2.790448 | -0.162050 |

|   |           |           |           |
|---|-----------|-----------|-----------|
| B | -0.782244 | 2.487902  | 0.800513  |
| B | -0.485891 | 1.508125  | 2.238772  |
| B | 0.781877  | 2.645669  | 1.694932  |
| O | 1.125758  | 3.809273  | 2.422131  |
| O | 1.148530  | 3.886445  | -0.763984 |
| H | 2.116304  | -1.015203 | 0.809447  |
| H | -1.094433 | 1.517731  | 3.255217  |
| H | -1.607523 | 3.339383  | 0.825246  |
| H | 1.734592  | 0.622326  | -1.634358 |
| H | 3.164509  | 1.929166  | 0.825263  |
| H | -1.117650 | 1.465247  | -1.634357 |
| H | -2.328184 | 0.298191  | 0.809444  |
| H | -0.273757 | -0.926444 | 2.106863  |
| H | 1.743601  | 0.679064  | 3.255211  |
| H | -0.275884 | -0.933641 | -0.461318 |
| H | 1.326485  | 4.488485  | 1.764662  |

25

9-S-,12-SH-*ortho*-carborane, E(B3LYP/aug-cc-pVTZ)= -1128.149407

|   |           |           |           |
|---|-----------|-----------|-----------|
| C | 0.000000  | 0.000000  | 0.000000  |
| C | 0.000000  | 0.000000  | 1.637949  |
| B | 1.503835  | 0.000000  | 0.806755  |
| B | 1.217523  | 1.003006  | -0.632601 |
| B | -0.485184 | 1.500994  | -0.632601 |
| B | -1.266837 | 0.810332  | 0.806754  |
| B | 1.225972  | 1.003375  | 2.237558  |
| B | 2.001783  | 1.677724  | 0.798880  |
| B | 0.794135  | 2.715253  | -0.154682 |
| B | -0.782284 | 2.491971  | 0.798888  |
| B | -0.492103 | 1.505858  | 2.237558  |
| B | 0.769934  | 2.632642  | 1.689750  |
| S | 1.219750  | 4.170691  | 2.647651  |
| S | 1.223240  | 4.182432  | -1.069983 |
| H | 2.122131  | -1.006506 | 0.809873  |
| H | -1.098226 | 1.519372  | 3.252815  |

|   |           |           |           |
|---|-----------|-----------|-----------|
| H | -1.606455 | 3.338382  | 0.817059  |
| H | 1.731663  | 0.645931  | -1.634764 |
| H | 3.152150  | 1.946656  | 0.817038  |
| H | -1.110706 | 1.477233  | -1.634763 |
| H | -2.330046 | 0.295618  | 0.809898  |
| H | -0.270631 | -0.925307 | 2.116455  |
| H | 1.743856  | 0.688154  | 3.252815  |
| H | -0.272107 | -0.930352 | -0.470388 |
| H | 1.420641  | 4.858234  | 1.484722  |

24

9,12-O'-*ortho*-carborane, E(B3LYP/aug-cc-pVTZ)= -481.490207

|   |           |           |           |
|---|-----------|-----------|-----------|
| C | 0.000000  | 0.000000  | 0.000000  |
| C | 0.000000  | 0.000000  | 1.614744  |
| B | 1.517086  | 0.000000  | 0.807362  |
| B | 1.235591  | 0.997897  | -0.623603 |
| B | -0.436569 | 1.527065  | -0.623599 |
| B | -1.240919 | 0.872919  | 0.807384  |
| B | 1.235590  | 0.997921  | 2.238339  |
| B | 2.047465  | 1.666230  | 0.807364  |
| B | 0.891745  | 2.817751  | -0.180683 |
| B | -0.715997 | 2.540889  | 0.807354  |
| B | -0.436540 | 1.527127  | 2.238344  |
| B | 0.891769  | 2.817854  | 1.795358  |
| O | 1.201469  | 3.796178  | 2.592696  |
| O | 1.201430  | 3.796021  | -0.978111 |
| H | 2.111204  | -1.033694 | 0.807393  |
| H | -1.068073 | 1.512724  | 3.249894  |
| H | -1.583994 | 3.361183  | 0.807253  |
| H | 1.743911  | 0.622955  | -1.635182 |
| H | 3.229329  | 1.837932  | 0.807287  |
| H | -1.068050 | 1.512799  | -1.635178 |
| H | -2.321530 | 0.369154  | 0.807398  |
| H | -0.293366 | -0.926771 | 2.081370  |
| H | 1.743952  | 0.622897  | 3.249871  |

H -0.293386 -0.926781 -0.466595

24

9,12-S-*ortho*-carborane, E(B3LYP/aug-cc-pVTZ)= -1127.463462

|   |           |           |           |
|---|-----------|-----------|-----------|
| C | 0.000000  | 0.000000  | 0.000000  |
| C | 0.000000  | 0.000000  | 1.629994  |
| B | 1.503831  | 0.000000  | 0.815053  |
| B | 1.231998  | 1.000646  | -0.618589 |
| B | -0.455211 | 1.520480  | -0.618680 |
| B | -1.243100 | 0.846301  | 0.814954  |
| B | 1.231977  | 1.000701  | 2.248686  |
| B | 2.021398  | 1.682946  | 0.815044  |
| B | 0.837532  | 2.718432  | -0.154058 |
| B | -0.723829 | 2.528727  | 0.814987  |
| B | -0.455287 | 1.520443  | 2.248605  |
| B | 0.837472  | 2.718399  | 1.784071  |
| S | 1.249835  | 4.057123  | 2.925703  |
| S | 1.249963  | 4.057145  | -1.295663 |
| H | 2.115268  | -1.018074 | 0.815050  |
| H | -1.082752 | 1.506475  | 3.254748  |
| H | -1.568887 | 3.360543  | 0.815006  |
| H | 1.742843  | 0.635997  | -1.624719 |
| H | 3.188048  | 1.895007  | 0.815051  |
| H | -1.082650 | 1.506469  | -1.624840 |
| H | -2.321450 | 0.348814  | 0.814993  |
| H | -0.284502 | -0.923298 | 2.107656  |
| H | 1.742708  | 0.635972  | 3.254846  |
| H | -0.284403 | -0.923320 | -0.477680 |

28

9,10-NH<sub>2</sub>-*meta*-carborane, E(B3LYP/aug-cc-pVTZ)= -443.0314439

|   |          |          |           |
|---|----------|----------|-----------|
| C | 0.000000 | 0.000000 | 0.000000  |
| B | 0.000000 | 0.000000 | 1.691008  |
| B | 1.509798 | 0.000000 | 0.745895  |
| B | 1.224119 | 0.925011 | -0.734158 |



|   |           |           |           |
|---|-----------|-----------|-----------|
| B | -0.466977 | 1.487258  | -0.691930 |
| B | -1.219046 | 0.895572  | 0.800858  |
| C | 1.248711  | 1.110431  | 1.988106  |
| B | 2.078294  | 1.658142  | 0.615582  |
| B | 0.858703  | 2.627921  | -0.299790 |
| B | -0.704271 | 2.611897  | 0.680212  |
| B | -0.376793 | 1.663283  | 2.144550  |
| B | 0.914852  | 2.692739  | 1.475599  |
| N | -1.645174 | 3.725890  | 0.593708  |
| N | 1.153682  | 3.786754  | -1.145321 |
| H | -0.200730 | -0.950850 | 2.352831  |
| H | 1.309846  | 3.604054  | 2.115070  |
| H | -2.329275 | 0.501345  | 0.806207  |
| H | -1.090006 | 1.489159  | -1.694266 |
| H | -0.302606 | -0.909357 | -0.493240 |
| H | -0.811950 | 1.862722  | 3.222871  |
| H | 3.235350  | 1.880179  | 0.670204  |
| H | 1.712037  | 0.556917  | -1.743096 |
| H | 2.198407  | -0.948396 | 0.839270  |
| H | 1.810875  | 0.974506  | 2.897690  |
| H | 1.236768  | 3.638231  | -2.137938 |
| H | 1.858751  | 4.432878  | -0.829561 |
| H | -1.400852 | 4.432735  | -0.085432 |
| H | -1.929809 | 4.162977  | 1.455737  |

26

9,10-OH-*meta*-carborane, E(B3LYP/aug-cc-pVTZ)= -482.8104761

|   |           |          |           |
|---|-----------|----------|-----------|
| C | 0.000000  | 0.000000 | 0.000000  |
| B | 0.000000  | 0.000000 | 1.690358  |
| B | 1.517335  | 0.000000 | 0.752552  |
| B | 1.259174  | 0.907711 | -0.733013 |
| B | -0.425269 | 1.471741 | -0.715435 |
| B | -1.202748 | 0.915619 | 0.786726  |
| C | 1.236328  | 1.101799 | 2.004977  |
| B | 2.095564  | 1.658033 | 0.629807  |

|   |           |           |           |
|---|-----------|-----------|-----------|
| B | 0.907887  | 2.608526  | -0.311585 |
| B | -0.646151 | 2.612919  | 0.644691  |
| B | -0.363436 | 1.663077  | 2.145600  |
| B | 0.929813  | 2.689449  | 1.485996  |
| O | -1.462880 | 3.758210  | 0.598654  |
| O | 1.273637  | 3.676415  | -1.138546 |
| H | 2.195097  | -0.954406 | 0.857892  |
| H | -1.049173 | 1.486910  | -1.717592 |
| H | 3.253196  | 1.862279  | 0.704386  |
| H | 1.319655  | 3.605931  | 2.117210  |
| H | 1.798792  | 0.962221  | 2.913831  |
| H | 1.755995  | 0.520001  | -1.728200 |
| H | -2.323857 | 0.549059  | 0.782200  |
| H | -0.827646 | 1.883252  | 3.205728  |
| H | -0.218744 | -0.950816 | 2.345674  |
| H | -0.302234 | -0.912259 | -0.488166 |
| H | -2.281452 | 3.638531  | 0.113862  |
| H | 0.703175  | 4.441705  | -1.027790 |

26

9,10-SH-*meta*-carborane, E(B3LYP/aug-cc-pVTZ)= -1128.7206425

|   |           |          |           |
|---|-----------|----------|-----------|
| C | 0.000000  | 0.000000 | 0.000000  |
| B | 0.000000  | 0.000000 | 1.692762  |
| B | 1.512167  | 0.000000 | 0.744603  |
| B | 1.230661  | 0.913602 | -0.734819 |
| B | -0.454015 | 1.486240 | -0.701790 |
| B | -1.214727 | 0.912365 | 0.799929  |
| C | 1.249572  | 1.101144 | 1.993922  |
| B | 2.077227  | 1.667404 | 0.619207  |
| B | 0.858920  | 2.605994 | -0.287606 |
| B | -0.674712 | 2.599846 | 0.680661  |
| B | -0.363667 | 1.656469 | 2.158937  |
| B | 0.911917  | 2.695424 | 1.491428  |
| S | -1.897986 | 4.005458 | 0.655301  |
| S | 1.388650  | 4.070240 | -1.321268 |

|   |           |           |           |
|---|-----------|-----------|-----------|
| H | 2.203171  | -0.946160 | 0.835142  |
| H | -1.082043 | 1.494739  | -1.698562 |
| H | 3.231690  | 1.891229  | 0.672965  |
| H | 1.308507  | 3.605352  | 2.125156  |
| H | 1.819118  | 0.964276  | 2.898924  |
| H | 1.720320  | 0.550373  | -1.741896 |
| H | -2.327938 | 0.528755  | 0.801592  |
| H | -0.808430 | 1.863366  | 3.228984  |
| H | -0.210855 | -0.951877 | 2.348915  |
| H | -0.309608 | -0.908571 | -0.490779 |
| H | -1.099040 | 4.851437  | -0.025537 |
| H | 0.623707  | 3.795973  | -2.392224 |

25

9-O-10-OH-*meta*-carborane, E(B3LYP/aug-cc-pVTZ)= -482.2410195

|   |           |           |           |
|---|-----------|-----------|-----------|
| C | 0.000000  | 0.000000  | 0.000000  |
| B | 0.000000  | 0.000000  | 1.691304  |
| B | 1.510415  | 0.000000  | 0.734724  |
| B | 1.239982  | -0.918297 | -0.747563 |
| B | -0.429528 | -1.478534 | -0.707458 |
| B | -1.205152 | -0.931190 | 0.800390  |
| C | 1.259946  | -1.088090 | 1.989599  |
| B | 2.097850  | -1.659063 | 0.607113  |
| B | 0.909494  | -2.743184 | -0.383600 |
| B | -0.643910 | -2.612561 | 0.670611  |
| B | -0.352569 | -1.667574 | 2.147324  |
| B | 0.957708  | -2.676570 | 1.483629  |
| O | 1.117802  | -3.804381 | -1.096063 |
| O | -1.484480 | -3.744474 | 0.583249  |
| H | 2.182339  | 0.965720  | 0.837676  |
| H | 1.348218  | -3.570106 | 2.156490  |
| H | 1.725868  | -0.486226 | -1.737575 |
| H | -1.088361 | -1.466043 | -1.692045 |
| H | -0.311746 | 0.913077  | -0.481277 |
| H | 3.268108  | -1.817607 | 0.697993  |

|   |           |           |           |
|---|-----------|-----------|-----------|
| H | -0.789681 | -1.866111 | 3.229306  |
| H | -2.323186 | -0.542406 | 0.807760  |
| H | -0.208430 | 0.958504  | 2.347450  |
| H | 1.825565  | -0.932955 | 2.894320  |
| H | -1.041581 | -4.350774 | -0.029613 |

25

9-S<sup>-</sup>-10-SH-*meta*-carborane, E(B3LYP/aug-cc-pVTZ)= -1128.1775459

|   |           |           |           |
|---|-----------|-----------|-----------|
| C | 0.000000  | 0.000000  | 0.000000  |
| B | 0.000000  | 0.000000  | 1.688581  |
| B | 1.512007  | 0.000000  | 0.729013  |
| B | 1.234185  | 0.922269  | -0.750472 |
| B | -0.429020 | 1.497483  | -0.709793 |
| B | -1.199673 | 0.930796  | 0.793260  |
| C | 1.261157  | 1.082337  | 1.987295  |
| B | 2.095715  | 1.661670  | 0.607209  |
| B | 0.921788  | 2.678065  | -0.354888 |
| B | -0.633880 | 2.605263  | 0.671897  |
| B | -0.340960 | 1.667717  | 2.146333  |
| B | 0.956463  | 2.686574  | 1.473466  |
| S | -1.761076 | 4.083850  | 0.581917  |
| S | 1.320708  | 4.087216  | -1.375324 |
| H | 2.192377  | -0.959609 | 0.819902  |
| H | -1.078992 | 1.485182  | -1.694985 |
| H | 3.260998  | 1.835122  | 0.687586  |
| H | 1.355284  | 3.574345  | 2.141313  |
| H | 1.830568  | 0.933987  | 2.890624  |
| H | 1.716589  | 0.509754  | -1.746238 |
| H | -2.318993 | 0.552021  | 0.798481  |
| H | -0.779599 | 1.873143  | 3.224190  |
| H | -0.216076 | -0.955052 | 2.345974  |
| H | -0.314764 | -0.907203 | -0.490046 |
| H | -0.901016 | 4.695020  | -0.296443 |

24

9,10-O'-*meta*-carborane, E(B3LYP/aug-cc-pVTZ)= -481.5165725

|   |           |           |           |
|---|-----------|-----------|-----------|
| C | 0.000000  | 0.000000  | 0.000000  |
| B | 0.000000  | 0.000000  | 1.680025  |
| B | 1.510815  | 0.000000  | 0.734786  |
| B | 1.227790  | 0.926988  | -0.743012 |
| B | -0.444880 | 1.524575  | -0.711114 |
| B | -1.205168 | 0.927006  | 0.779151  |
| C | 1.240621  | 1.091601  | 1.982927  |
| B | 2.072957  | 1.670685  | 0.607934  |
| B | 0.929474  | 2.679207  | -0.376412 |
| B | -0.745026 | 2.679213  | 0.671202  |
| B | -0.359963 | 1.670683  | 2.130101  |
| B | 0.906590  | 2.713762  | 1.449071  |
| O | 1.565267  | 3.961704  | -1.480227 |
| O | -2.015743 | 3.961715  | 0.760160  |
| H | 2.207170  | -0.954175 | 0.824387  |
| H | -1.072385 | 1.462400  | -1.714115 |
| H | 3.240208  | 1.851258  | 0.700965  |
| H | 1.334938  | 3.580628  | 2.133687  |
| H | 1.808642  | 0.960167  | 2.890813  |
| H | 1.713649  | 0.508014  | -1.739072 |
| H | -2.313411 | 0.508043  | 0.780428  |
| H | -0.786817 | 1.851268  | 3.220476  |
| H | -0.223993 | -0.954174 | 2.345434  |
| H | -0.311412 | -0.905236 | -0.497743 |

24

9,10-S'-*meta*-carborane, E(B3LYP/aug-cc-pVTZ)= -1127.4930208

|   |           |          |           |
|---|-----------|----------|-----------|
| C | 0.000000  | 0.000000 | 0.000000  |
| B | 0.000000  | 0.000000 | 1.680025  |
| B | 1.510818  | 0.000000 | 0.734787  |
| B | 1.227790  | 0.926988 | -0.743012 |
| B | -0.444898 | 1.524593 | -0.711093 |
| B | -1.205169 | 0.926999 | 0.779157  |
| C | 1.240621  | 1.091601 | 1.982927  |

|   |           |           |           |
|---|-----------|-----------|-----------|
| B | 2.072996  | 1.670670  | 0.607909  |
| B | 0.929479  | 2.679211  | -0.376404 |
| B | -0.745003 | 2.679212  | 0.671225  |
| B | -0.359961 | 1.670675  | 2.130098  |
| B | 0.906606  | 2.713760  | 1.449061  |
| S | -2.015707 | 3.961724  | 0.760211  |
| S | 1.565284  | 3.961717  | -1.480201 |
| H | 2.207176  | -0.954174 | 0.824382  |
| H | -1.072415 | 1.462428  | -1.714087 |
| H | 3.240247  | 1.851241  | 0.700940  |
| H | 1.334947  | 3.580627  | 2.133681  |
| H | 1.808642  | 0.960167  | 2.890812  |
| H | 1.713649  | 0.508014  | -1.739072 |
| H | -2.313411 | 0.508034  | 0.780435  |
| H | -0.786815 | 1.851260  | 3.220474  |
| H | -0.223993 | -0.954174 | 2.345434  |
| H | -0.311414 | -0.905234 | -0.497746 |
